# Supplementary material for: The shared genetic risk architecture of neurological and psychiatric disorders: a genome-wide analysis
Source: PubMed Central journal article supplement — medRxiv. 2023 Sep 26:2023.07.21.23292993. Originally published 2023 Jul 23. Preprint. [Version 2] doi: 10.1101/2023.07.21.23292993 (PMC10371109; doi:10.1101/2023.07.21.23292993), 2023-09-26
Supplement: media-1.pdf [file media-1.pdf]

## Supplementary Information for:

### Genome-wide analyses reveal widespread genetic overlap between neurological and psychiatric disorders and a convergence of biological associations related to the brain

Olav B. Smeland<sup>1</sup>, Gleda Kutrolli<sup>1</sup>, Shahram Bahrami<sup>1</sup>, Vera Fominykh<sup>1</sup>, Nadine Parker<sup>1</sup>, Guy F. L. Hindley<sup>1,2</sup>, Linn Rødevand<sup>1</sup>, Piotr Jaholkowski<sup>1</sup>, Markos Tesfaye<sup>1,3</sup>, Pravesh Parekh<sup>1</sup>, Torbjørn Elvsåshagen<sup>1,4</sup>, Andrew D. Grotzinger<sup>5,6</sup>, The International Multiple Sclerosis Genetics Consortium (IMSGC), The International Headache Genetics Consortium (IHGC), Nils Eiel Steen<sup>1</sup>, Dennis van der Meer<sup>1,7</sup>, Kevin S. O'Connell<sup>1</sup>, Srdjan Djurovic<sup>8,9</sup>, Anders M. Dale<sup>10,11,12,13</sup>, Alexey A. Shadrin<sup>1,14#</sup>, Oleksandr Frei<sup>1,15#</sup>, Ole A. Andreassen<sup>1,14</sup>

#### Affiliations

<sup>1</sup> NORMENT, Division of Mental Health and Addiction, Oslo University Hospital & Institute of Clinical Medicine, University of Oslo, Oslo, Norway

<sup>2</sup> Psychosis Studies, Institute of Psychiatry, Psychology and Neurosciences, King's College London, London, United Kingdom

<sup>3</sup> Department of Psychiatry, St. Paul's Hospital Millennium Medical College, Addis Ababa, Ethiopia

<sup>4</sup> Department of Neurology, Division of Clinical Neuroscience, Oslo University Hospital, Oslo, Norway

<sup>5</sup> Department of Psychology and Neuroscience, University of Colorado at Boulder, Boulder, CO, USA.

<sup>6</sup> Institute for Behavioral Genetics, University of Colorado at Boulder, Boulder, CO, USA.

<sup>7</sup> School of Mental Health and Neuroscience, Faculty of Health, Medicine and Life Sciences, Maastricht University, The Netherlands

<sup>8</sup> Department of Medical Genetics, Oslo University Hospital, Oslo, Norway

<sup>9</sup> NORMENT, Department of Clinical Science, University of Bergen, Bergen, Norway

<sup>10</sup> Multimodal Imaging Laboratory, University of California San Diego, La Jolla, USA

<sup>11</sup> Department of Psychiatry, University of California, San Diego, La Jolla, USA,

<sup>12</sup> Department of Neurosciences, University of California San Diego, La Jolla, USA

<sup>13</sup> Department of Radiology, University of California, San Diego, La Jolla, USA

<sup>14</sup> KG Jebsen Centre for Neurodevelopmental disorders, University of Oslo, Oslo, Norway

<sup>15</sup> Center for Bioinformatics, Department of Informatics, University of Oslo, Oslo, Norway

# These authors contributed equally.

## Table of Contents

|          |                                                                                   |           |
|----------|-----------------------------------------------------------------------------------|-----------|
| <b>1</b> | <b>Supplementary Methods</b> .....                                                | <b>3</b>  |
| 1.1      | <i>Descriptions of GWAS summary data</i> .....                                    | 3         |
| 1.1.1    | <b>Neurological disorders</b> .....                                               | 3         |
| 1.1.2    | <b>Psychiatric disorders</b> .....                                                | 5         |
| 1.1.3    | <b>Comparators</b> .....                                                          | 9         |
| <b>2</b> | <b>Supplementary Results</b> .....                                                | <b>11</b> |
| 2.1      | <i>Global genetic correlations</i> .....                                          | 11        |
| 2.2      | <i>Differential expression of MAGMA genes in specific tissues</i> .....           | 13        |
| <b>3</b> | <b>Supplementary Figures</b> .....                                                | <b>15</b> |
| 3.1      | <i>Supplementary Fig. 1   GWAS power plots</i> .....                              | 15        |
| 3.2      | <i>Supplementary Fig. 2   Genetic correlations</i> .....                          | 16        |
| 3.3      | <i>Supplementary Fig. 3   Bivariate MiXeR estimates of genetic overlap</i> .....  | 17        |
| 3.4      | <i>Supplementary Fig. 4   Tissue specific expression of mapped genes</i> .....    | 53        |
| 3.5      | <i>Supplementary Fig. 5   Cell type specific expression of mapped genes</i> ..... | 60        |
| <b>4</b> | <b>Supplementary References</b> .....                                             | <b>67</b> |

## 1 Supplementary Methods

### 1.1 Descriptions of GWAS summary data

GWAS summary statistics for 28 phenotypes were included in this cross-trait analysis. A summary of the samples contributing to each GWAS, including the phenotype definition, is provided below. Detailed information about cohort design, genotyping, quality control and imputation can be found in the original publications (Table 1).

#### 1.1.1 Neurological disorders

**Alzheimer's disease (ALZ).** We retrieved GWAS summary statistics based on 12 cohorts contributing to the Wightman *et al.* (2021) GWAS on ALZ<sup>1</sup>, yielding a total sample of 86,531 cases and 676,386 controls, all of European ancestry. Depending on the cohort, cases had been clinically diagnosed with ALZ according to ICD-9 or ICD-10 criteria, were found to have definite, probable or possible ALZ at a memory clinic, or were identified in medical registries as having been prescribed Donepezil (Aricept). Additionally, a proxy phenotype for ALZ case-control status was generated from a self-report questionnaire from the UK Biobank<sup>2</sup>, in which participants reported whether their biological mother or father ever suffered from ALZ/dementia, and they reported each parent's current age (or age at death, if applicable).

**Amyotrophic lateral sclerosis (ALS).** 117 cohorts were meta-analyzed, yielding a total sample of 27,205 cases and 110,881 controls. All cases were diagnosed and ascertained through specialized motor neuron disease clinics where they were diagnosed with ALS according to the (revised) El Escorial Criteria<sup>3</sup> by neurologists specialized in motor neuron diseases. All individuals were of European ancestry.

**Essential tremor (ET).** Two clinical cohorts, comprising of samples from multiple centers, were meta-analyzed together with data from two population-based cohorts from the UK Biobank and 23andMe, yielding a total sample of 7,177 cases and 475,877 controls<sup>4</sup>. In the clinical cohorts, cases were diagnosed according to consensus criteria from the Movement Disorder Society (MDS), the Tremor Research Investigational Group (TRIG), other clinical or research criteria, or review of longitudinal movement disorder clinical notes. In the population-based cohorts, cases self-reported as having ET. All individuals were of European ancestry.

**Focal epilepsy (FE) and genetic generalized epilepsy (GGE).** The multi-ancestry GWAS<sup>5</sup> on the broad epilepsy subtypes FE and GGE by the International league against epilepsy (ILAE) included 14,939 cases with FE, 6,952 cases with GGE and 42,436 controls of European ancestry that were included in the present analysis. All cases were classified by neurologists.

**Lewy body dementia (LBD).** The GWAS on LBD<sup>6</sup> comprised of multiple sites/consortia from Europe and North America, of which GWAS summary data on 2,591 cases and 4,027 controls of European ancestry were included in the present analysis. Cases were diagnosed with pathologically definite or clinically probable disease according to consensus criteria.

**Migraine (MIG).** We retrieved GWAS summary data based on four study collections contributing to the GWAS on MIG by the International Headache Genetics Consortium (IHGC)<sup>7</sup>, totaling 48,975 cases and 540,381 controls. Most migraine diagnoses were self-reported, while a subset of cases was phenotyped in headache specialist centers. All individuals were of European ancestry.

**Multiple sclerosis (MS).** We retrieved GWAS summary data on 14,802 cases and 26,703 controls contributing to the GWAS on MS by the International Multiple Sclerosis Genetics Consortium (IMSGC)<sup>8</sup>. Cases were determined according to standard diagnostic criteria. All individuals were of European ancestry.

**Parkinson's disease (PD).** The GWAS summary data was based on a meta-analysis from three different GWAS<sup>9-11</sup>, yielding a total sample of 53,858 cases and 846,380 controls. A subset of cases was ascertained by clinicians<sup>10</sup>, a subset in the 23andMe cohort self-reported as having PD in a web-based survey<sup>11</sup>, while another subset was determined as proxy-cases using UK Biobank data (individuals who do not have Parkinson's disease but have a first degree relative that does)<sup>9</sup>. All individuals were of European ancestry.

**Stroke.** We included GWAS summary statistics on any stroke (comprising ischemic stroke, intracerebral hemorrhage, and stroke of unknown or undetermined type) contributing to a recent GWAS on stroke<sup>12</sup>. Cases were determined according to various clinical criteria depending on the cohort. All individuals were of European ancestry.

### 1.1.2 Psychiatric disorders

**Anorexia nervosa (AN).** Thirty-three datasets were meta-analyzed, yielding 16,992 cases and 55,525 controls<sup>13</sup>. Cases met criteria for lifetime diagnosis of AN via hospital or register records, structured clinical interviews, or online questionnaires based on standardized criteria (DSM-III-R, DSM-IV, ICD-8, ICD-9 or ICD-10), while in one contributing cohort, the UK Biobank, cases self-reported diagnosis of AN. All individuals were of European ancestry.

**Anxiety disorders (ANX).** Three cohorts were meta-analyzed<sup>14</sup>, yielding a total sample of 31,977 cases and 82,114 controls. In the first cohort from the UK Biobank, cases self-reported a lifetime professional diagnosis for at least one of the core five ANX (generalized anxiety disorder, social phobia, panic disorder, agoraphobia or specific phobia). Additionally, some cases met criteria for a likely lifetime diagnosis of DSM-IV generalized anxiety disorder based on anxiety questions from the Composite International Diagnostic Interview Short-form questionnaire. In the second cohort from the ANGST study<sup>15</sup>, cases met DSM criteria for at least one of the five core ANX. In the third cohort from iPSYCH<sup>16</sup>, diagnosis of one of the five ANX was made by a psychiatrist. All individuals were of European ancestry.

**Attention deficit hyperactive disorder (ADHD).** Twelve cohorts, including data from iPSYCH, deCODE genetics and ten cohorts collected by the PGC, were meta-analyzed, yielding a sample of 38,691 cases and 186,843 controls<sup>17</sup>. In the iPSYCH cohort, cases were diagnosed by psychiatrists according to ICD-10 criteria identified using the Danish Psychiatric Central Research Register and the Danish National Patient register. In the deCODE cohort, cases had been diagnosed according to ICD-10 criteria, or had been prescribed medication specific for ADHD symptoms. Depending on the PGC cohorts, cases were recruited from clinics, hospitals or through medical registries and diagnosed using research-based assessments administered by clinicians or trained staff. All individuals were of European ancestry.

**Autism spectrum disorder (ASD).** Five family-based cohorts and a population-based case-control sample from iPSYCH were meta-analyzed<sup>18</sup>, yielding a sample of 18,381 cases and 27,969 controls. In the family-based cohorts, diagnosis was confirmed for all affected individuals using standard research tools and expert clinical consensus diagnosis. In the

population-based sample, cases were identified using the Danish Psychiatric Central Research Register and were diagnosed with ASD before 2014 by a psychiatrist according to ICD-10. All individuals were of European ancestry.

**Bipolar disorder (BD).** Fifty-seven cohorts collected in Europe, North America and Australia were meta-analyzed, yielding a total sample of 41,917 cases and 371,549 controls<sup>19</sup>. For 52 cohorts, cases met international consensus criteria (DSM-IV, ICD-9 or ICD-10) for lifetime diagnosis of BD, established using structured diagnostic interviews, clinician-administered checklists or medical record review. For five external cohorts (iPSYCH, deCODE genetics, Estonian Biobank, Trøndelag Health Study (HUNT) and UK Biobank), cases were ascertained using ICD codes or self-report during a nurse interview. All individuals were of European ancestry.

**Major depressive disorder (MDD).** We meta-analyzed separate GWAS data on MDD, from the PGC<sup>20</sup>, 23andMe<sup>21</sup>, UK Biobank<sup>22</sup>, Million Veteran Program<sup>23</sup>, and FinnGen<sup>24</sup>, yielding a total sample of 412,305 cases and 1,588,397 controls. In the PGC cohort<sup>20</sup>, lifetime diagnosis of MDD was ascertained using structured clinical interviews (DSM-V, ICD-9, ICD-10), clinician-administered checklists, or review of medical records, while some met broader criteria. In the 23andMe cohort<sup>21</sup>, cases were defined according to a self-reported clinical diagnosis of depression. In the UK Biobank cohort<sup>22</sup>, case and control status of broad depression was defined by the participants' response to the questions 'Have you ever seen a general practitioner for nerves, anxiety, tension or depression?' or 'Have you ever seen a psychiatrist for nerves, anxiety, tension or depression?', while participants who either identified with bipolar disorder, schizophrenia, or personality disorder, or were prescribed antipsychotic medications, were excluded. In both the Million Veteran Program and FinnGen cohorts, case

definitions were derived from electronic health record data based on ICD-9 and -ICD-10 codes for MDD. All individuals were of European ancestry.

**Obsessive compulsive disorder (OCD).** Two cohorts were meta-analyzed yielding 2,688 cases and 7,037 controls<sup>25</sup>. All cases met DSM-IV criteria for OCD. All individuals were of European ancestry.

**Post-traumatic stress disorder (PTSD).** We included only individuals of European ancestry of an ancestrally diverse meta-analysis of 60 different PTSD-cohorts<sup>26</sup>, yielding 20,329 cases and 124,440 controls. Cases were determined either by lifetime or current PTSD. Diagnosis was established using various instruments and different versions of the DSM (DSM-III-R, DSM-IV, DSM-5).

**Schizophrenia (SCZ).** We excluding all individuals of non-European ancestry from the recent GWAS on SCZ from the PGC<sup>27</sup>, yielding a sample of 53,386 cases and 77,258 controls across 75 cohorts. Depending on the cohort, cases were defined as individuals diagnosed with schizophrenia, schizoaffective disorder, or schizophrenia spectrum disorders, determined by research diagnostic interview, expert clinical consensus diagnosis, or review of medical records or hospital registers.

**Tourette syndrome (TS).** The GWAS consisted of three case-control cohorts and one family-based cohort including 4,819 cases and 9,488 controls<sup>28</sup>. All cases met DSM-IV-TR or DSM-5 criteria for TS, while 12 cases met DSM-5 criteria for chronic motor or vocal tic disorder. Cases were recruited through TS specialty clinics or were identified by email or online recruitment



combined with validated, web-based phenotypic assessments. All individuals were of European ancestry.

### **1.1.3 Comparators**

**Average cortical thickness (CRT-TH) and total cortical surface area (CRT-SA).** To generate the neuroimaging data, we used the Freesurfer v5.3 automatic cortical pipeline<sup>29</sup> to process T1-weighted MRI data from all white Europeans participating in the UK Biobank, under accession number 27412. The final neuroimaging sample included 32,877 individuals, after excluding individuals with poor scan quality, and all individuals with a neurological, psychiatric or brain-related disorder, specifically the ICD10 diagnoses ‘Malignant neoplasms of eye, brain and other parts of central nervous system’ (C69-C72), ‘Mental, Behavioral and Neurodevelopmental disorders’ (F00-F99), ‘Diseases of the nervous system’ (G00-G99), ‘Cerebrovascular diseases’ (I60-I69), and ‘Congenital malformations of the nervous system’ (Q00-07), to avoid bias when estimating genetic overlap with neurological and psychiatric disorders. Age, sex, scanner location, scan quality and the first twenty genetic principal components were included as covariates and a rank-based inverse normal transformation was applied to the phenotype when conducting association analysis. We further made use of the UK Biobank v3 imputed data. The GWAS on brain morphology measures were carried out using the standard additive model of linear association in regenie v3.2.5.<sup>30</sup>

**General cognitive ability (COG).** 14 epidemiological cohorts contributed to the GWAS on COG<sup>31</sup>, including a total of 269,867 participants of European ancestry. Various neurocognitive tests, primarily assessing fluid domains of cognitive functioning, were conducted across the cohorts.

**Chronic kidney disease (CKD).** We retrieved GWAS summary data on 41,395 cases and 439,303 controls of European ancestry contributing to a GWAS on CKD<sup>32</sup>. CKD was defined as an eGFR below 60 ml min<sup>-1</sup> per 1.73 m<sup>2</sup>.

**Coronary artery disease (CAD).** We included GWAS summary statistics on 71,602 cases and 260,875 controls of European ancestry contributing to GWAS on CAD<sup>33-35</sup>. Cases were defined by an inclusive CAD phenotype, for example fatal or nonfatal myocardial infarction, acute coronary syndrome, percutaneous transluminal coronary angioplasty, coronary artery bypass grafting, chronic ischemic heart disease, angina and coronary stenosis of >50%.

**Inflammatory bowel disease (IBD).** A total of 25,042 cases and 34,915 controls contributed to the GWAS on IBD, all of European ancestry<sup>36</sup>. Diagnosis of IBD was based on accepted radiological, endoscopic and histopathological criteria.

**Type 2 Diabetes (T2D).** The GWAS summary statistics on T2D was based on a meta-analysis of 32 GWAS, including 74,124 cases and 824,006 controls, all of European ancestry<sup>37</sup>. Cases were defined according to standard diagnostic criteria.

**Height.** We included GWAS summary statistics on 4,080,687 individuals of European ancestry contributing to the recent GWAS on height<sup>38</sup>.

## 2 Supplementary Results

### 2.1 Global genetic correlations

Using linkage disequilibrium score regression (LDSC)<sup>39</sup> (Fig. 3; Supplementary Table 4), we estimated significant genetic correlations between ET and five psychiatric disorders at FDR < 0.05. Specifically, ET was positively correlated with PTSD ( $r_g=0.40$ ,  $p=4.00 \times 10^{-4}$ ), ANX ( $r_g=0.37$ ,  $p=4.63 \times 10^{-6}$ ), MDD ( $r_g=0.22$ ,  $p=6.08 \times 10^{-7}$ ), AN ( $r_g=0.17$ ,  $p=2.80 \times 10^{-3}$ ) and ADHD ( $r_g=0.15$ ,  $p=7.40 \times 10^{-3}$ ), indicating shared genetic effects. MIG, which was positively correlated with ET ( $r_g=0.17$ ,  $p=3.90 \times 10^{-3}$ ), showed a similar pattern of genetic correlations with psychiatric disorders as ET. Specifically, MIG was significantly correlated with ANX ( $r_g=0.35$ ,  $p=8.59 \times 10^{-16}$ ), MDD ( $r_g=0.29$ ,  $p=1.71 \times 10^{-45}$ ), PTSD ( $r_g=0.22$ ,  $p=1.00 \times 10^{-4}$ ), ADHD ( $r_g=0.20$ ,  $p=6.83 \times 10^{-10}$ ), ASD ( $r_g=0.12$ ,  $p=3.30 \times 10^{-3}$ ) and TS ( $r_g=0.12$ ,  $p=1.39 \times 10^{-2}$ ) at FDR < 0.05. Stroke was also significantly correlated with multiple psychiatric disorders at FDR < 0.05. Stroke was positively correlated with ADHD ( $r_g=0.29$ ,  $p=6.70 \times 10^{-13}$ ), PTSD ( $r_g=0.28$ ,  $p=1.00 \times 10^{-4}$ ), ANX ( $r_g=0.20$ ,  $p=5.09 \times 10^{-5}$ ), MDD ( $r_g=0.16$ ,  $p=1.22 \times 10^{-7}$ ) and BD ( $r_g=0.09$ ,  $p=9.30 \times 10^{-3}$ ), while it was negatively correlated with OCD ( $r_g=-0.19$ ,  $p=5.90 \times 10^{-3}$ ).

Except for negative correlations between CRT-TH and the psychiatric disorders ADHD ( $r_g=-0.19$ ,  $p=1.67 \times 10^{-7}$ ), ANX ( $r_g=-0.14$ ,  $p=1.60 \times 10^{-3}$ ) and MDD ( $r_g=-0.08$ ,  $p=1.40 \times 10^{-3}$ ), neither of the two neuroimaging measures were significantly correlated with neurological or psychiatric disorders at FDR < 0.05. CRT-TH and CRT-SA were negatively correlated with each other ( $r_g=-0.36$ ,  $p=3.43 \times 10^{-17}$ ), while CRT-TH was positively correlated with COG ( $r_g=0.23$ ,  $p=4.75 \times 10^{-17}$ ) and height ( $r_g=0.20$ ,  $p=6.86 \times 10^{-16}$ ), and negatively correlated with CAD ( $r_g=-0.12$ ,  $p=5.00 \times 10^{-4}$ ). Cognitive impairment is a clinical hallmark shared between many psychiatric and neurological conditions<sup>40-43</sup>. As expected<sup>31</sup>, COG was negatively correlated with several neurological and psychiatric disorders, but positively correlated with ASD ( $r_g=0.23$ ,  $p=5.60 \times 10^{-14}$ ) and AN ( $r_g=0.09$ ,  $p=3.60 \times 10^{-3}$ ). Notably, COG was also significantly

correlated with somatic disorders CAD ( $r_g=-0.19$ ,  $p=2.14 \times 10^{-18}$ ), T2D ( $r_g=-0.05$ ,  $p=1.22 \times 10^{-2}$ ), IBD ( $r_g=0.10$ ,  $p=2.00 \times 10^{-4}$ ) as well as height ( $r_g=0.10$ ,  $p=2.65 \times 10^{-16}$ ), indicating that genetic variants linked to COG influence a wide spectrum of health-related traits. CAD, which was genetically correlated with stroke ( $r_g=0.52$ ,  $p=1.65 \times 10^{-33}$ ), showed a similar pattern of genetic correlations as stroke. Specifically, CAD was significantly correlated with four psychiatric disorders (MDD ( $r_g=0.22$ ,  $p=4.15 \times 10^{-24}$ ), ADHD ( $r_g=0.31$ ,  $p=5.06 \times 10^{-26}$ ), ANX ( $r_g=0.25$ ,  $p=1.85 \times 10^{-10}$ ) and PTSD ( $r_g=0.27$ ,  $p=9.66 \times 10^{-6}$ ) as well as FE ( $r_g=0.20$ ,  $p=5.60 \times 10^{-3}$ ). T2D, a cardiovascular disease risk factor, was also significantly correlated with MDD ( $r_g=0.11$ ,  $p=2.86 \times 10^{-10}$ ), ADHD ( $r_g=0.18$ ,  $p=4.82 \times 10^{-11}$ ) and ANX ( $r_g=0.11$ ,  $p=2.20 \times 10^{-3}$ ), but negatively correlated with AN ( $r_g=-0.10$ ,  $p=1.40 \times 10^{-3}$ ) and OCD ( $r_g=-0.14$ ,  $p=5.20 \times 10^{-3}$ ). Apart from psychiatric disorders, T2D was significantly correlated with stroke ( $r_g=0.27$ ,  $p=2.92 \times 10^{-13}$ ), MS ( $r_g=0.08$ ,  $p=1.26 \times 10^{-2}$ ), and CAD ( $r_g=0.33$ ,  $p=4.18 \times 10^{-27}$ ). IBD was significantly positively correlated with five psychiatric disorders SCZ ( $r_g=0.14$ ,  $p=9.83 \times 10^{-9}$ ), BD ( $r_g=0.09$ ,  $p=8.00 \times 10^{-4}$ ), MDD ( $r_g=0.11$ ,  $p=6.11 \times 10^{-7}$ ), ANX ( $r_g=0.11$ ,  $p=3.50 \times 10^{-3}$ ) and OCD ( $r_g=0.15$ ,  $p=1.03 \times 10^{-2}$ ), but only with MS ( $r_g=0.25$ ,  $p=4.45 \times 10^{-9}$ ) among the neurological disorders. CKD was negatively correlated with four psychiatric disorders SCZ ( $r_g=-0.14$ ,  $p=4.67 \times 10^{-5}$ ), BD ( $r_g=-0.11$ ,  $p=2.80 \times 10^{-3}$ ), PTSD ( $r_g=-0.36$ ,  $p=1.00 \times 10^{-4}$ ), and AN ( $r_g=-0.17$ ,  $p=3.60 \times 10^{-3}$ ), but not with any neurological disorder. Height showed multiple significant genetic correlations at  $FDR < 0.05$ . Specifically, height was negatively correlated with MDD ( $r_g=-0.04$ ,  $p=2.00 \times 10^{-4}$ ), ANX ( $r_g=-0.07$ ,  $p=9.00 \times 10^{-4}$ ), PTSD ( $r_g=-0.11$ ,  $p=6.10 \times 10^{-3}$ ), ALZ ( $r_g=-0.09$ ,  $p=1.80 \times 10^{-2}$ ), and CAD ( $r_g=-0.13$ ,  $p=2.55 \times 10^{-12}$ ), and positively correlated with CRT-TH ( $r_g=0.20$ ,  $p=6.86 \times 10^{-16}$ ), COG ( $r_g=-0.10$ ,  $p=2.65 \times 10^{-16}$ ) and CKD ( $r_g=0.10$ ,  $p=3.00 \times 10^{-4}$ ), demonstrating multiple health-related correlations with this anthropometric measure. As observed for other measures of genetic overlap in this study, the presence of statistically significant genetic correlations appeared to be driven by statistical power. The GWAS with low power (e.g., TS and OCD)

showed fewer significant correlations than other psychiatric disorders, while this is likely to change as their respective GWAS increase in sample size.

## **2.2 Differential expression of MAGMA genes in specific tissues**

Using MAGMA, we evaluated whether the implicated genes for each GWAS were differentially expressed in 54 specific human tissue types based on Genotype-Tissue Expression v.8 data<sup>44</sup>, as implemented in FUMA<sup>45</sup> (Supplementary Fig. 3) Risk genes for ALZ were significantly upregulated in the spleen, the terminal ileum of the small intestine and in whole blood, all linked to the immune system. Risk genes for ADHD were significantly upregulated in the cerebral cortex only. Risk genes for AN were significantly downregulated in the putamen and the hippocampus, and differentially expressed in the putamen, the hippocampus and the amygdala (considering both sides). Genes implicated for CRT-TH were significantly upregulated in the cerebellar hemisphere only. Genes implicated for COG were significantly upregulated in several brain tissues, specifically the anterior cingulate cortex, frontal cortex, cerebral cortex, nucleus accumbens, the cerebellar hemisphere and the cerebellum, and downregulated in the renal cortex. Moreover, COG genes were differentially expressed in the following brain tissues, the putamen, anterior cingulate cortex, hypothalamus, amygdala, hippocampus, frontal cortex, cerebral cortex, nucleus accumbens and the substantia nigra. Height genes were significantly upregulated, downregulated or differentially expressed in 37 out of all 54 tissue types assessed, indicating body-wide expression of height genes. Risk genes for IBD were significantly upregulated in the spleen and whole blood, and downregulated in several brain tissues, specifically the putamen, amygdala, hippocampus, C-1 of the spinal cord, the substantia nigra, hypothalamus and frontal cortex. Risk genes for MDD were significantly upregulated in several brain tissues, specifically the hypothalamus, nucleus accumbens, putamen, hippocampus, the frontal cortex, nucleus caudate, substantia nigra, amygdala, anterior cingulate cortex, cerebral

cortex, cerebellum, and the cerebellar hemisphere. Moreover, risk genes for MDD were differentially expressed in the hypothalamus, nucleus accumbens, putamen, hippocampus, and the frontal cortex. Risk genes for MS were significantly upregulated in EBV-transformed lymphocytes, the spleen, whole blood and in the terminal ileum of the small intestine. PD risk genes were significantly upregulated in the substantia nigra only. Risk genes for SCZ were significantly upregulated in several brain tissues, specifically the hippocampus, frontal cortex, cerebellum, the anterior cingulate cortex, the cerebral cortex, the cerebellar hemisphere, the amygdala, and the nucleus accumbens. Furthermore, SCZ risk genes were differentially expressed in the hippocampus, frontal cortex, cerebellum, and the anterior cingulate cortex. Finally, T2D risk genes were significantly downregulated in the substantia nigra, amygdala, hippocampus, C-1 of the spinal cord, putamen, caudate nucleus, nucleus accumbens and the hypothalamus.

### 3 Supplementary Figures

#### 3.1 Supplementary Fig. 1 | GWAS power plots

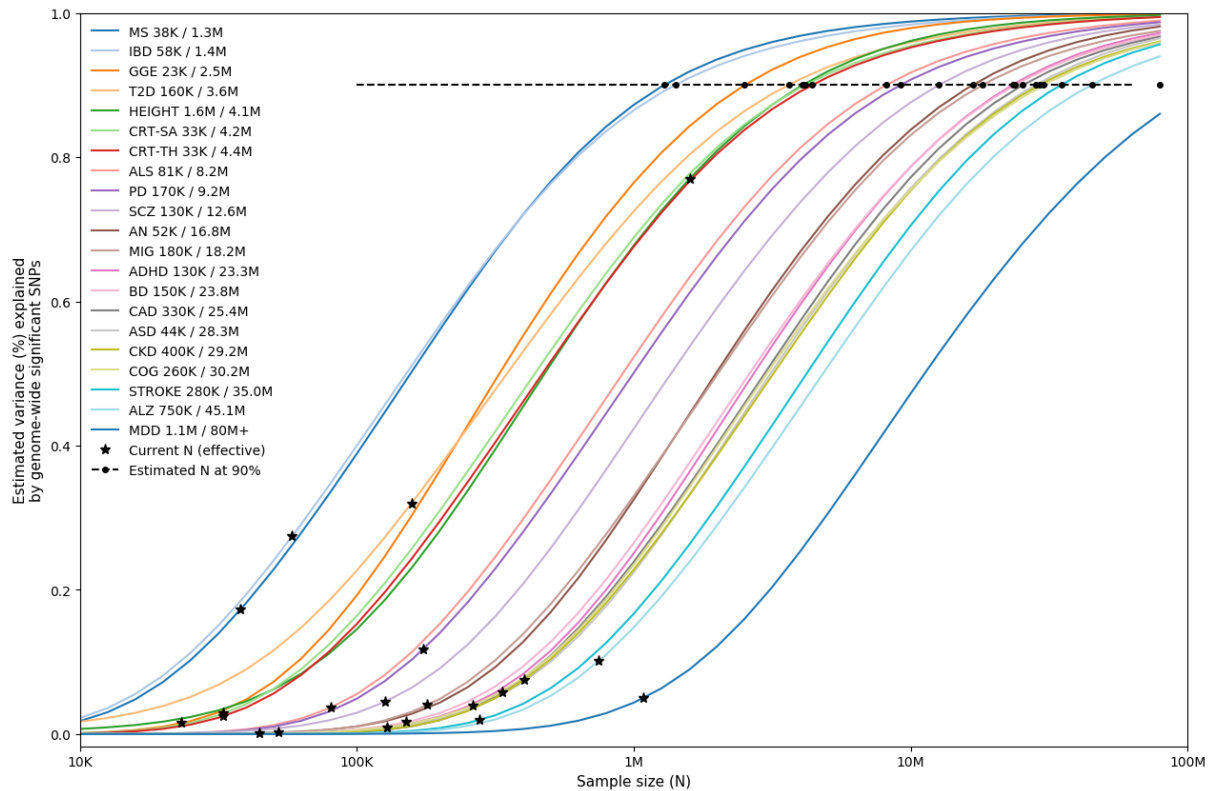

**Supplementary Fig. 1 | GWAS power plots.** Power plots of current and future GWAS estimated using MiXeR<sup>46</sup>, displaying the proportion of SNP- heritability explained by genome-wide significant SNPs as a function of sample size, N. Asterisks indicate the current effective sample sizes of the GWAS, and circles indicate the estimated sample sizes needed to capture 90% of the genetic variance for that phenotype.

### 3.2 Supplementary Fig. 2 | Genetic correlations

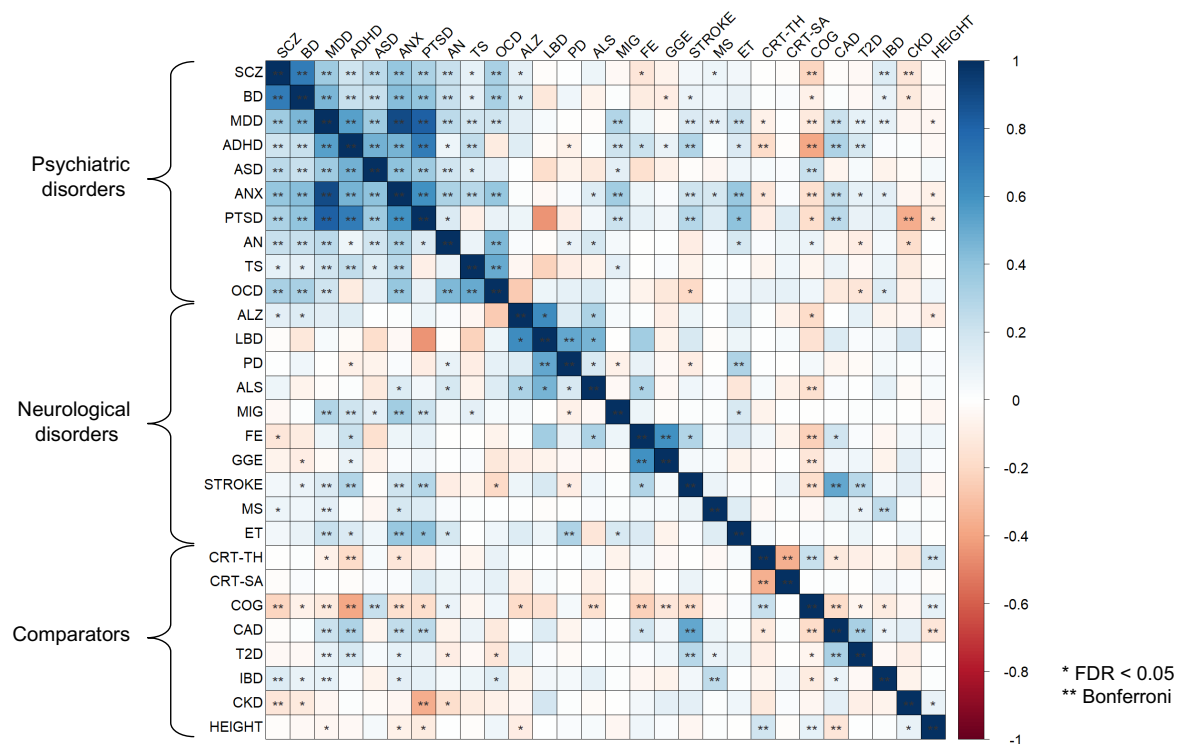

**Supplementary Fig. 2 | Genetic correlations.** Global pairwise genetic correlations across all phenotypes estimated using linkage disequilibrium score regression<sup>39</sup>. One asterisk denotes statistical significance at  $FDR < 0.05$ , two asterisks denote statistical significance after Bonferroni correction. The color denotes the magnitude and direction of correlation.



### 3.3 Supplementary Fig. 3 | Bivariate MiXeR estimates of genetic overlap

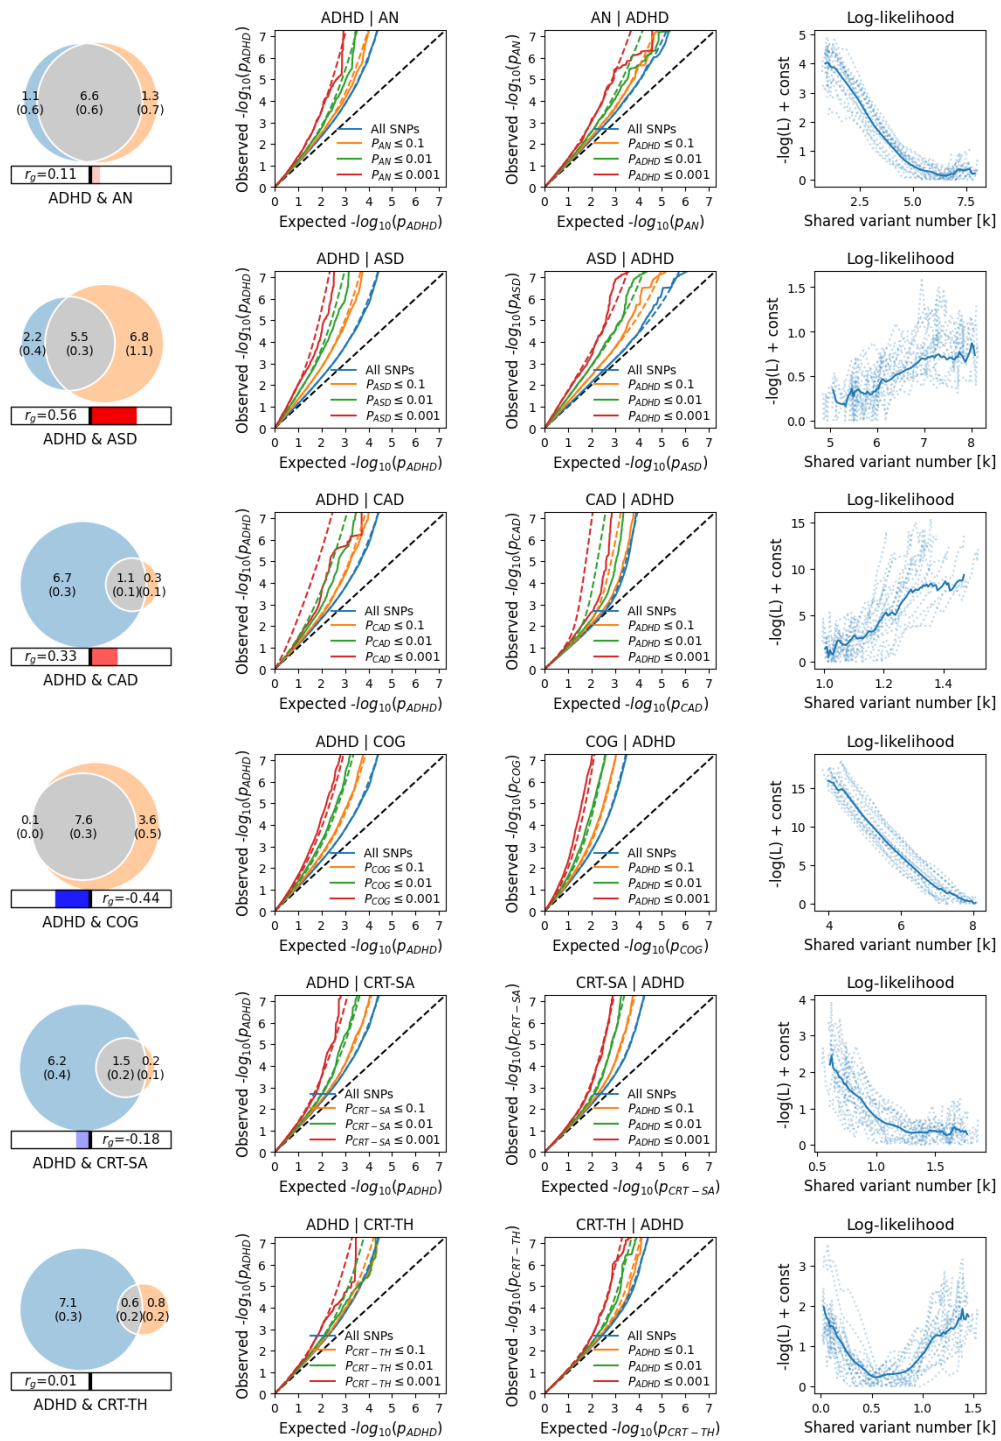

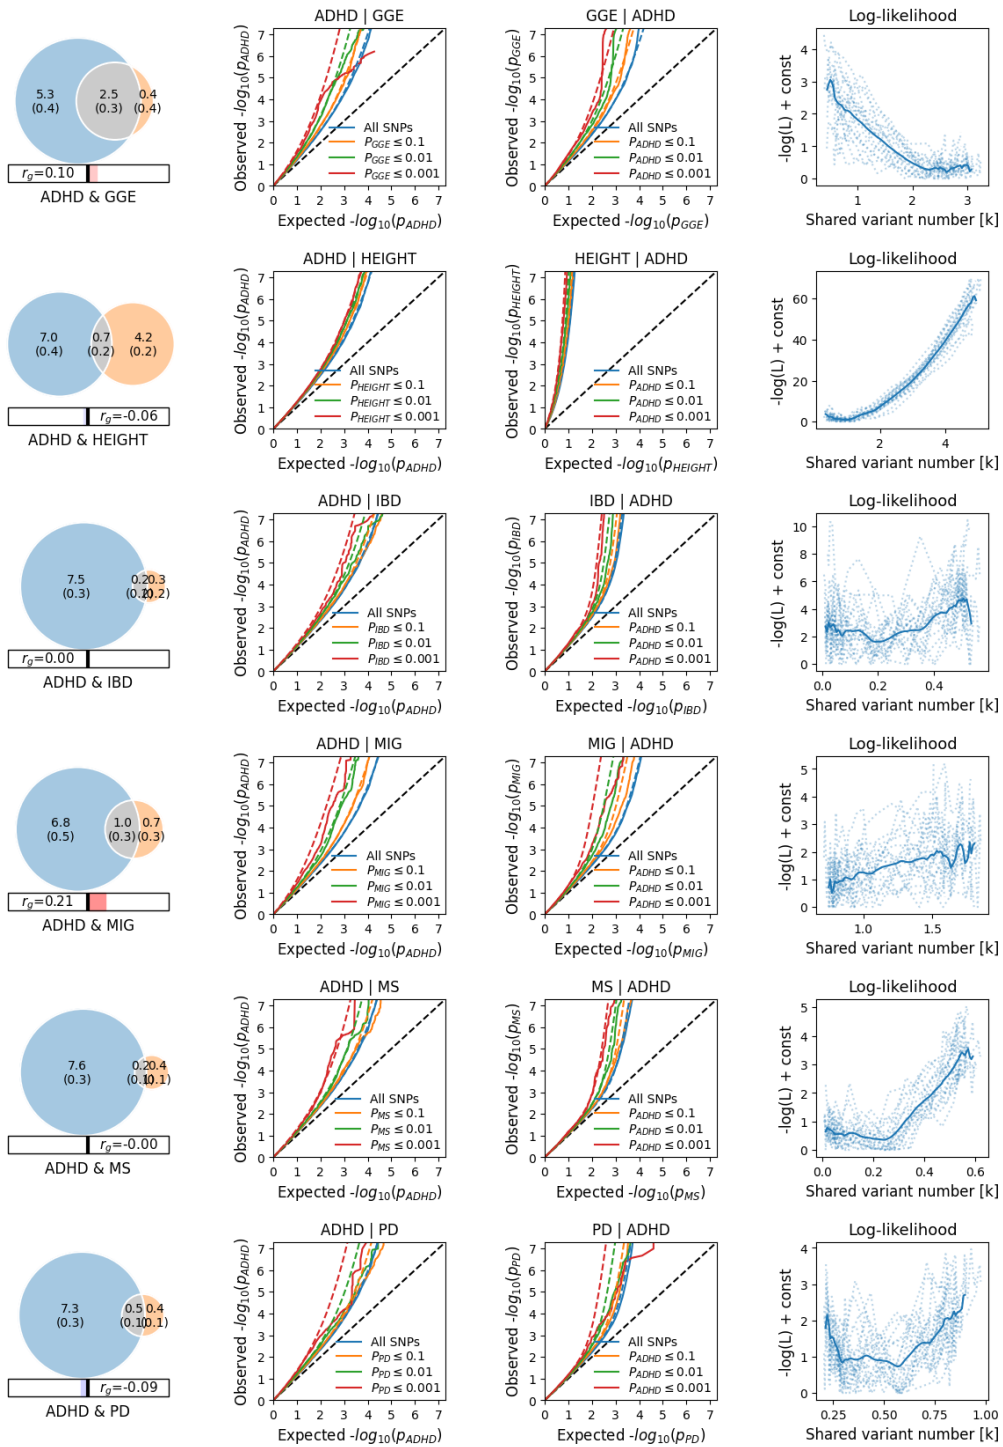

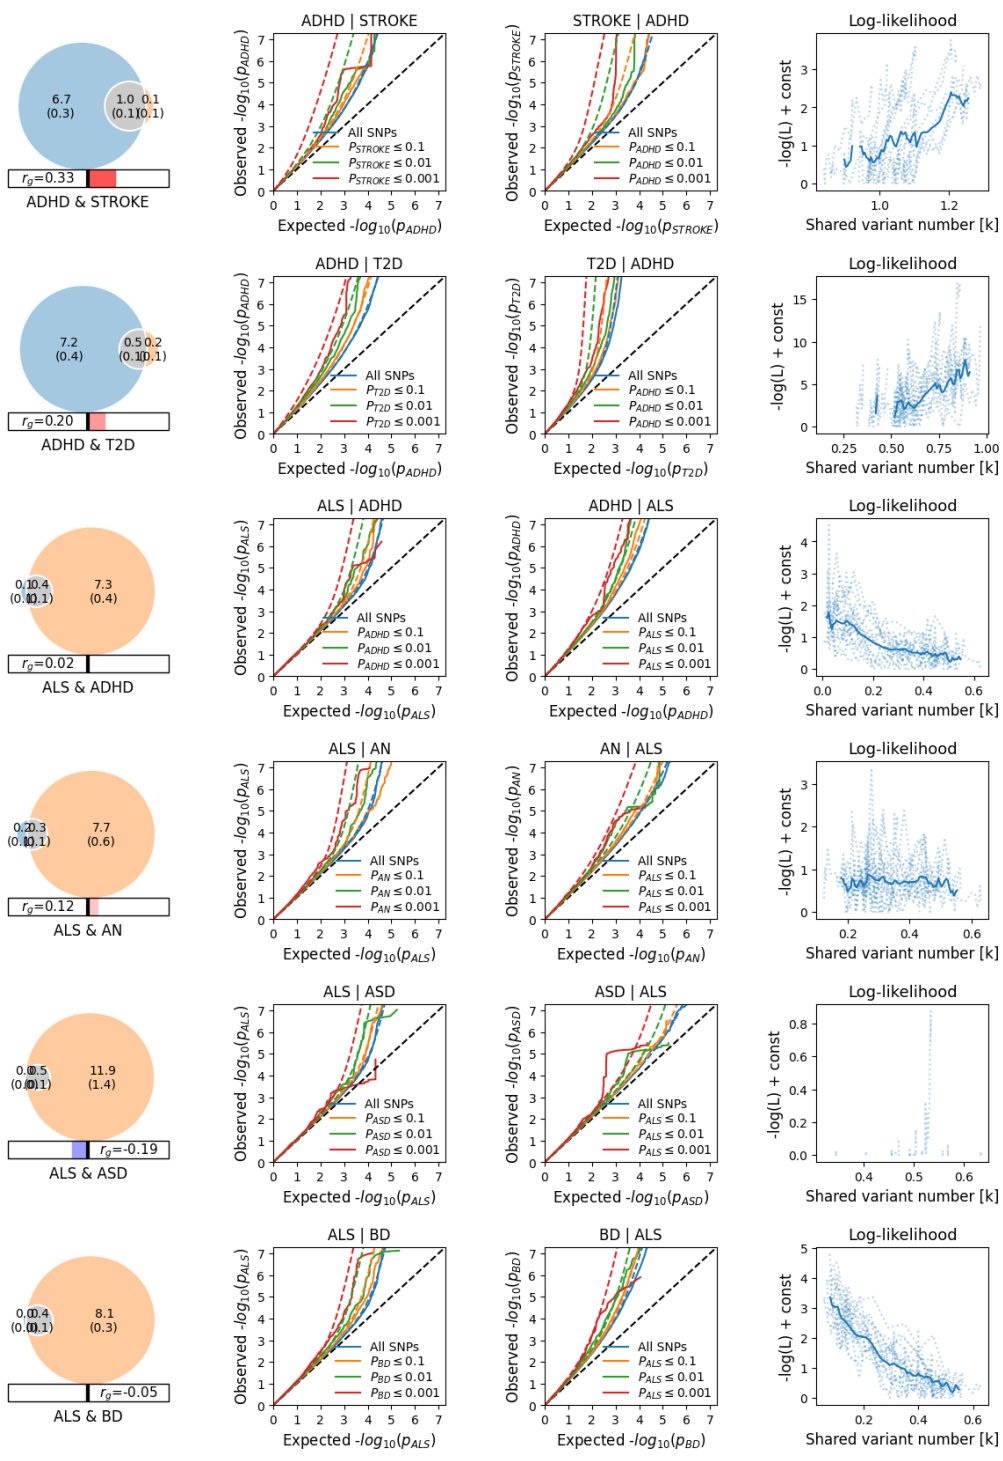

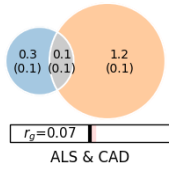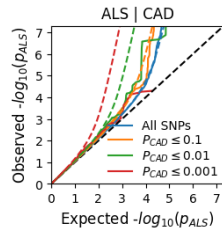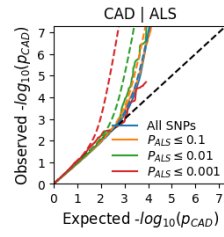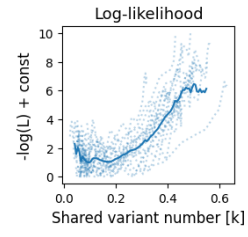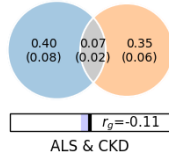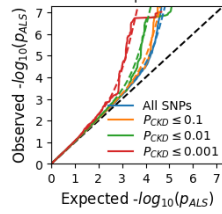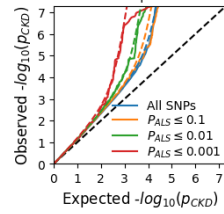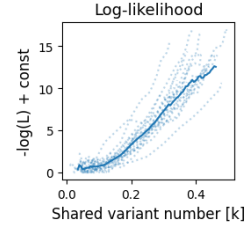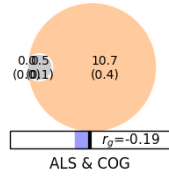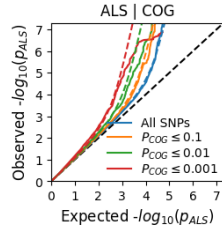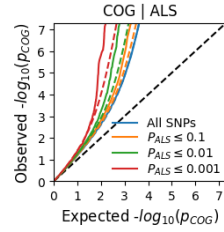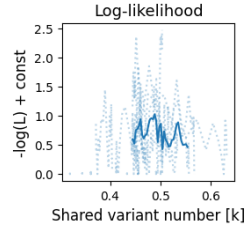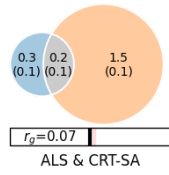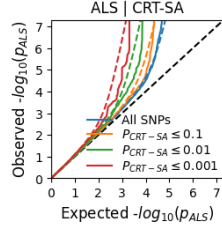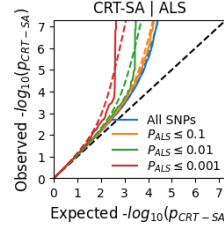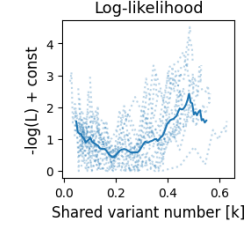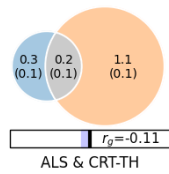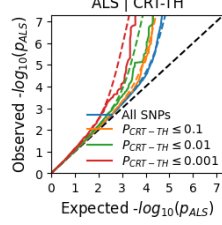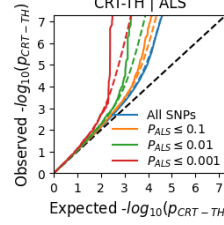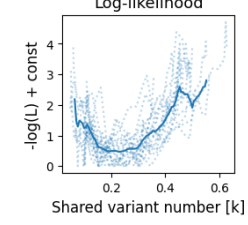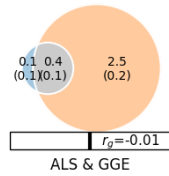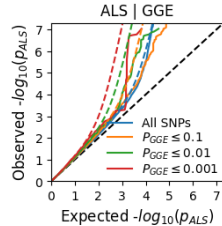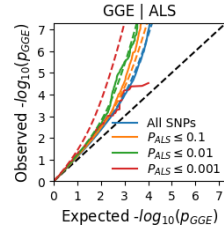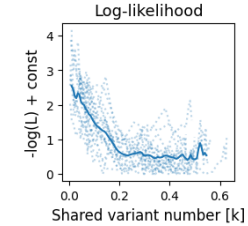

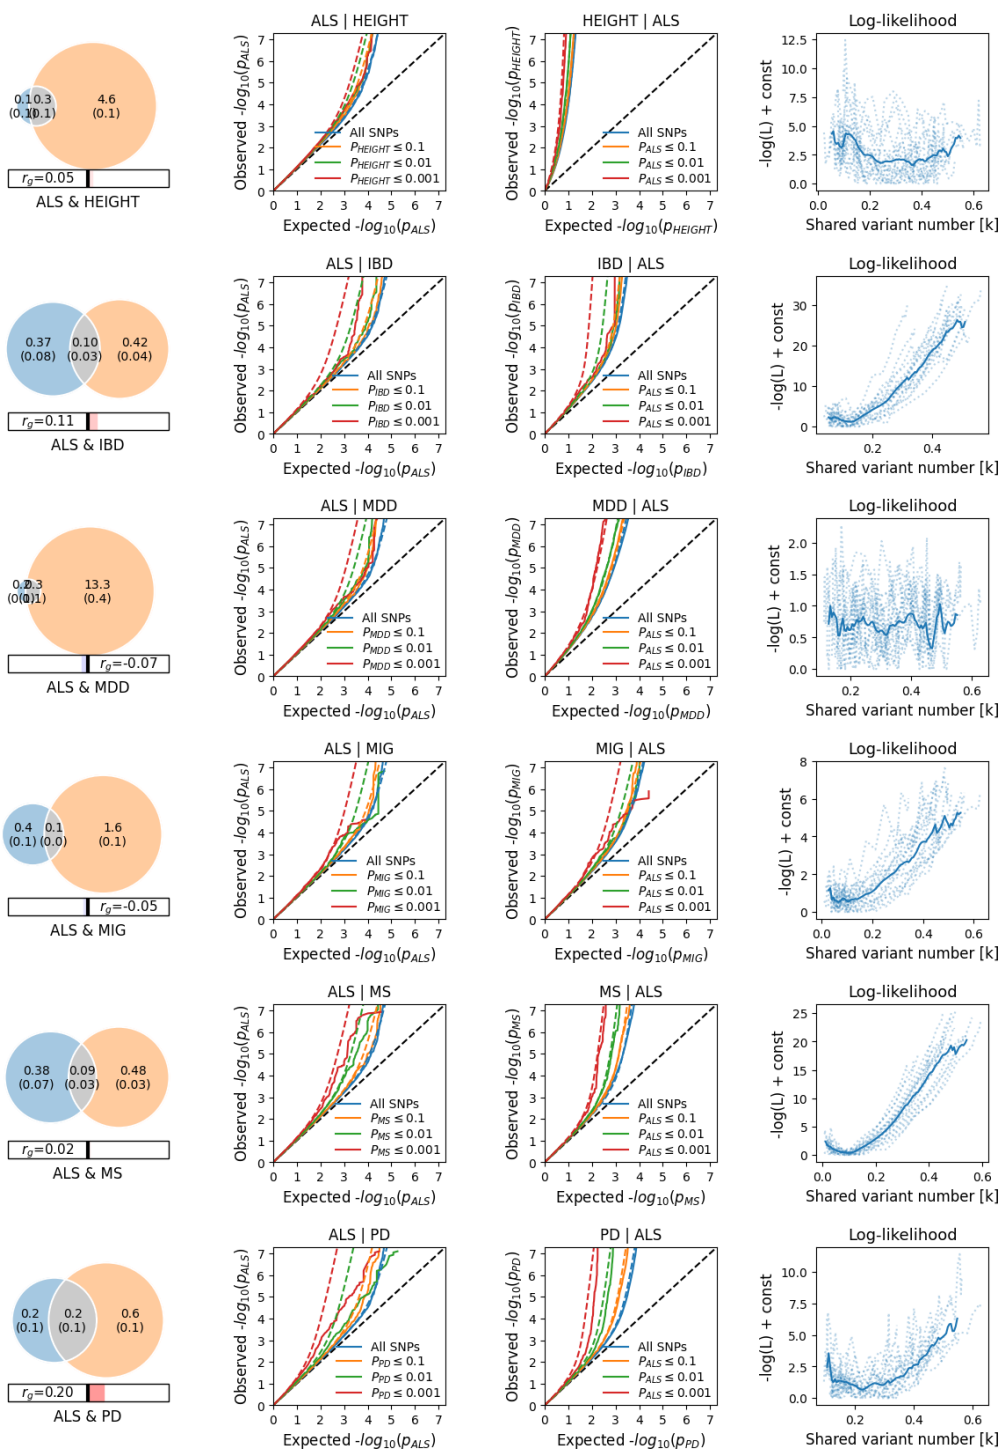

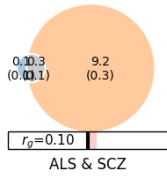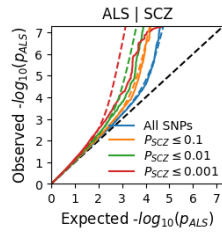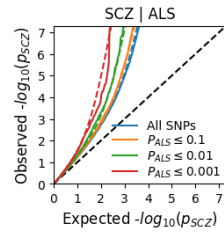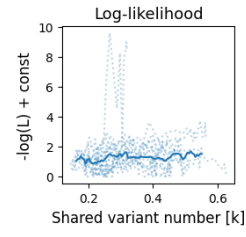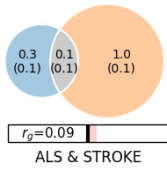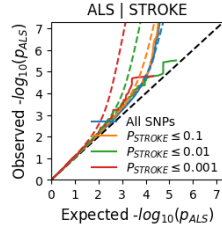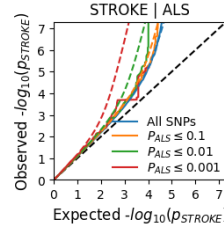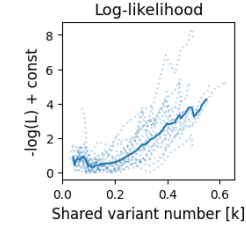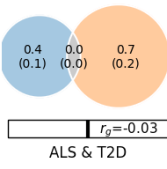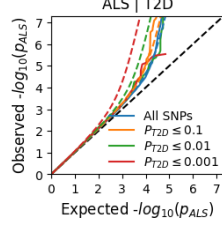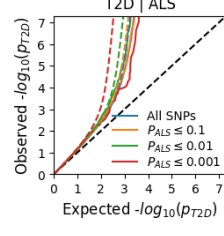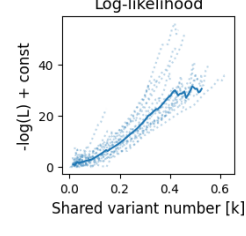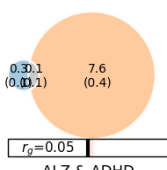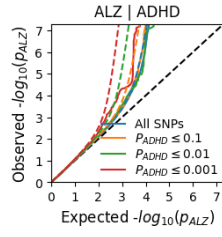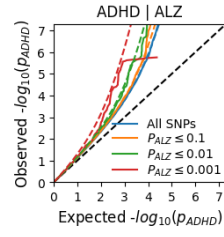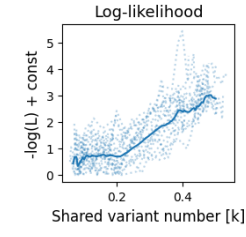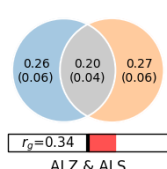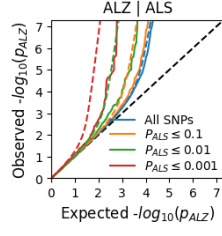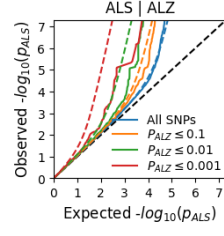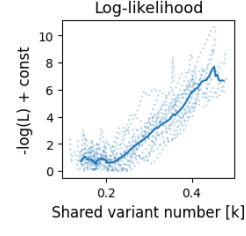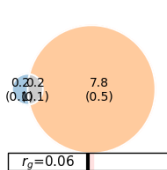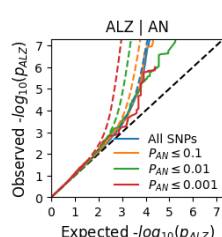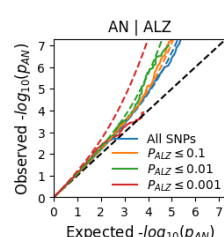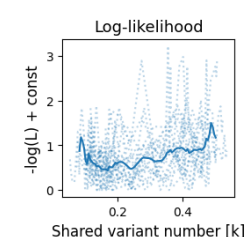

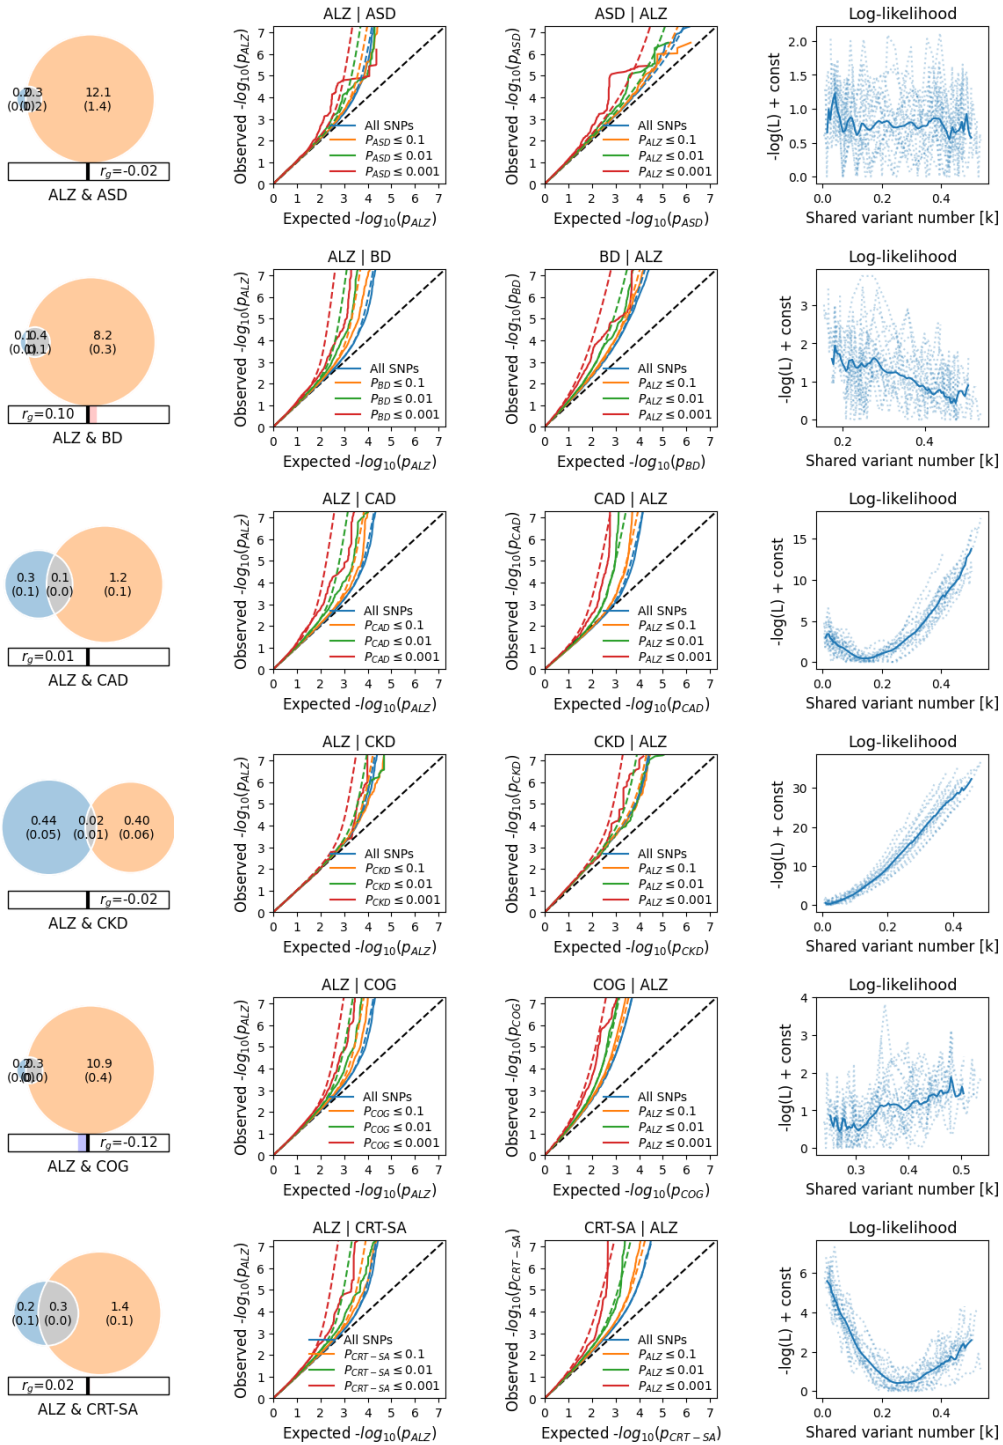

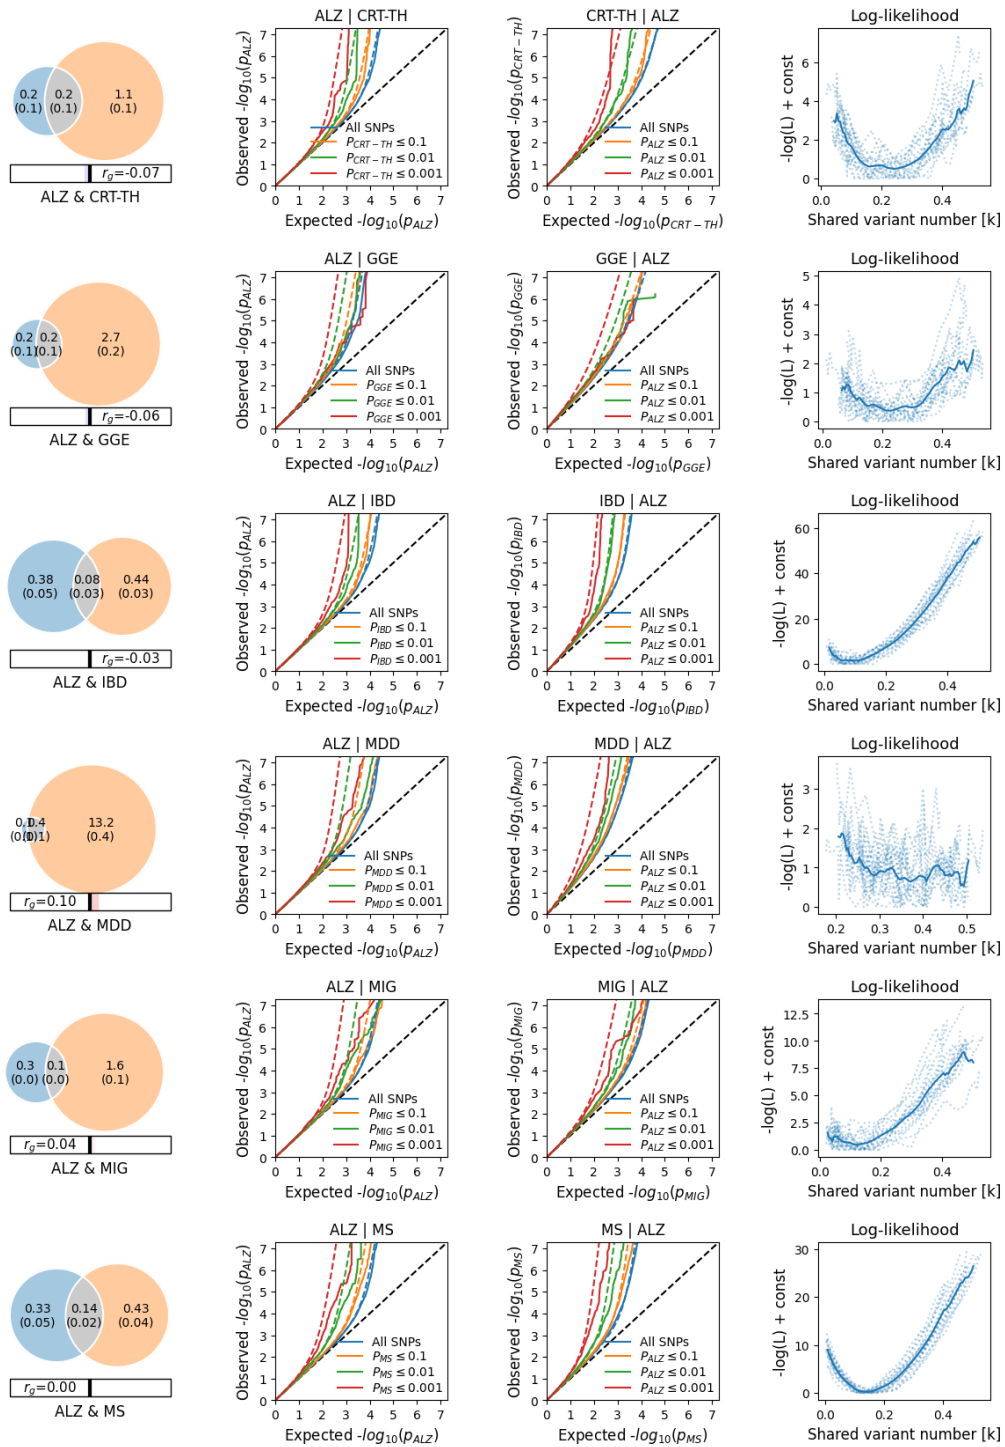



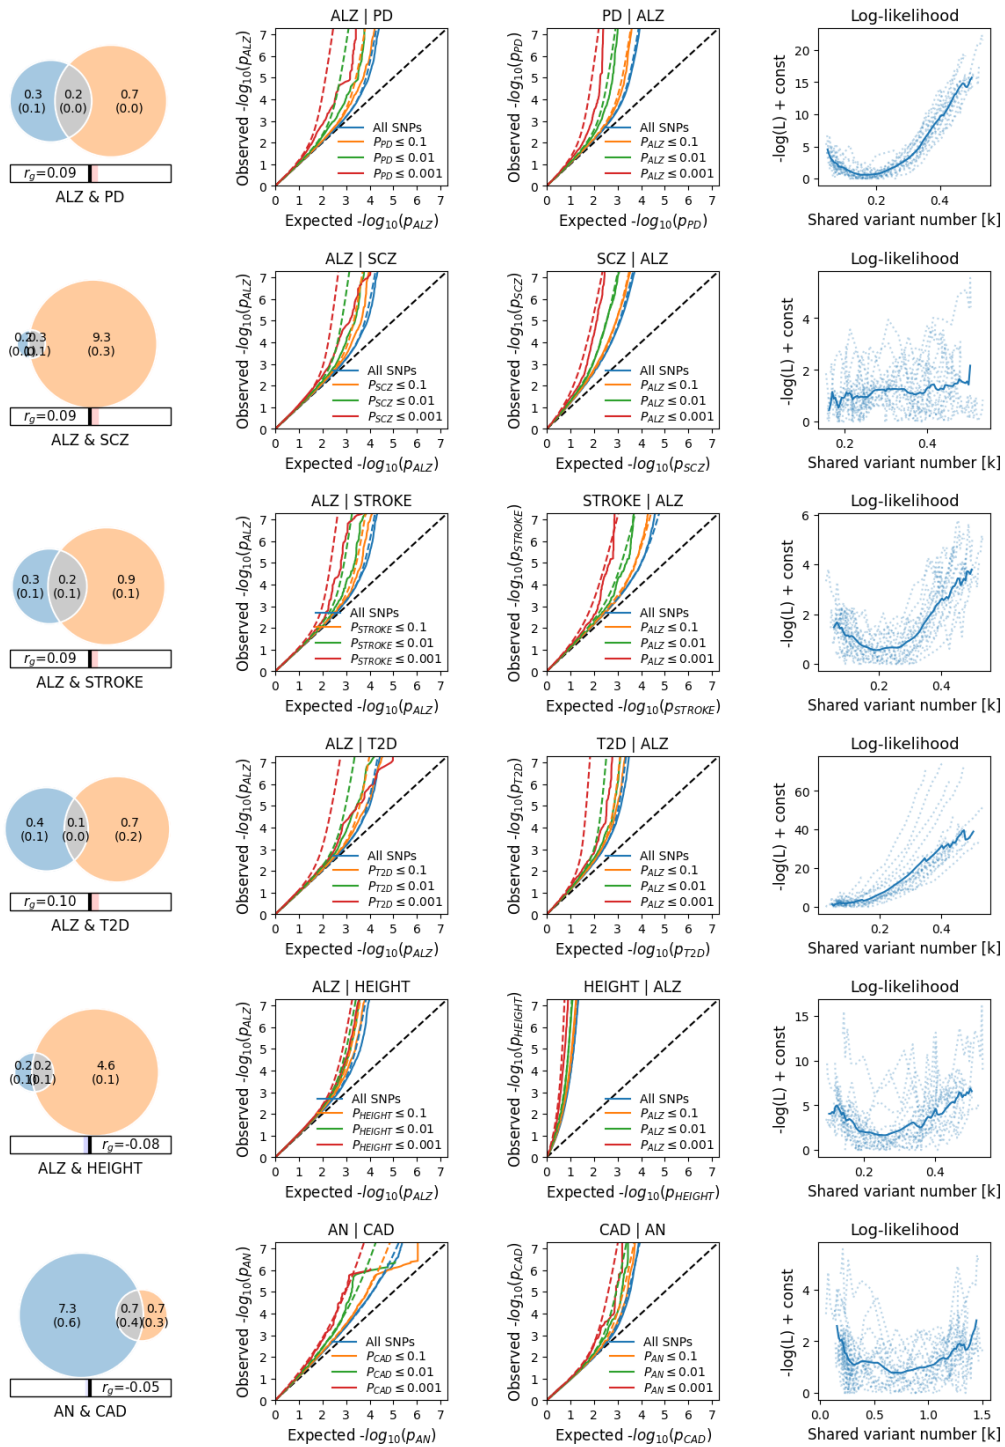

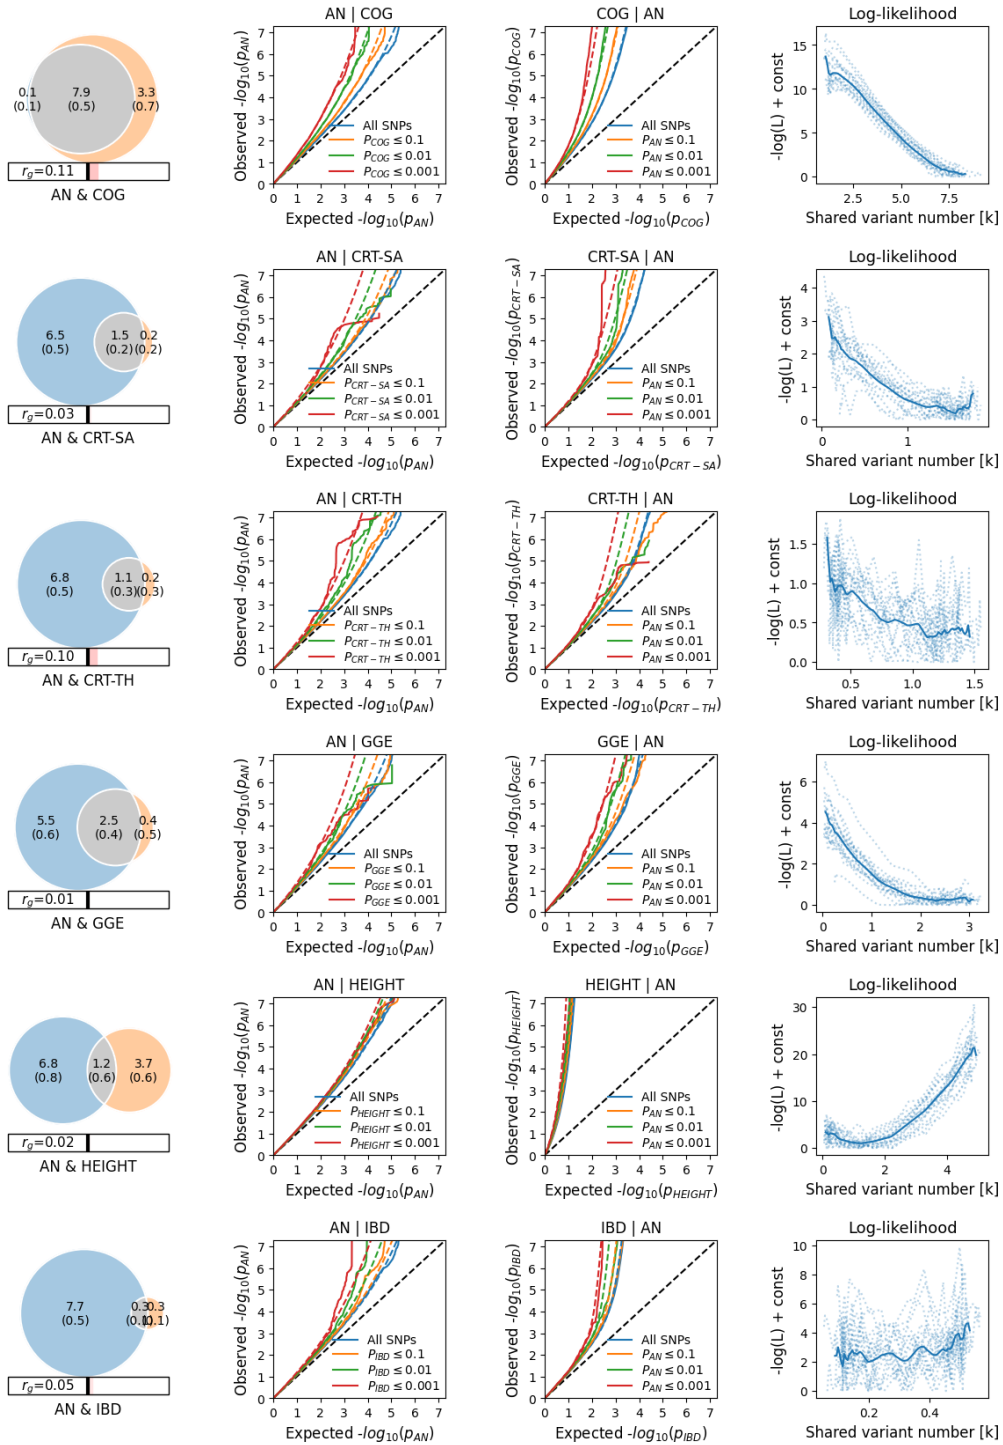

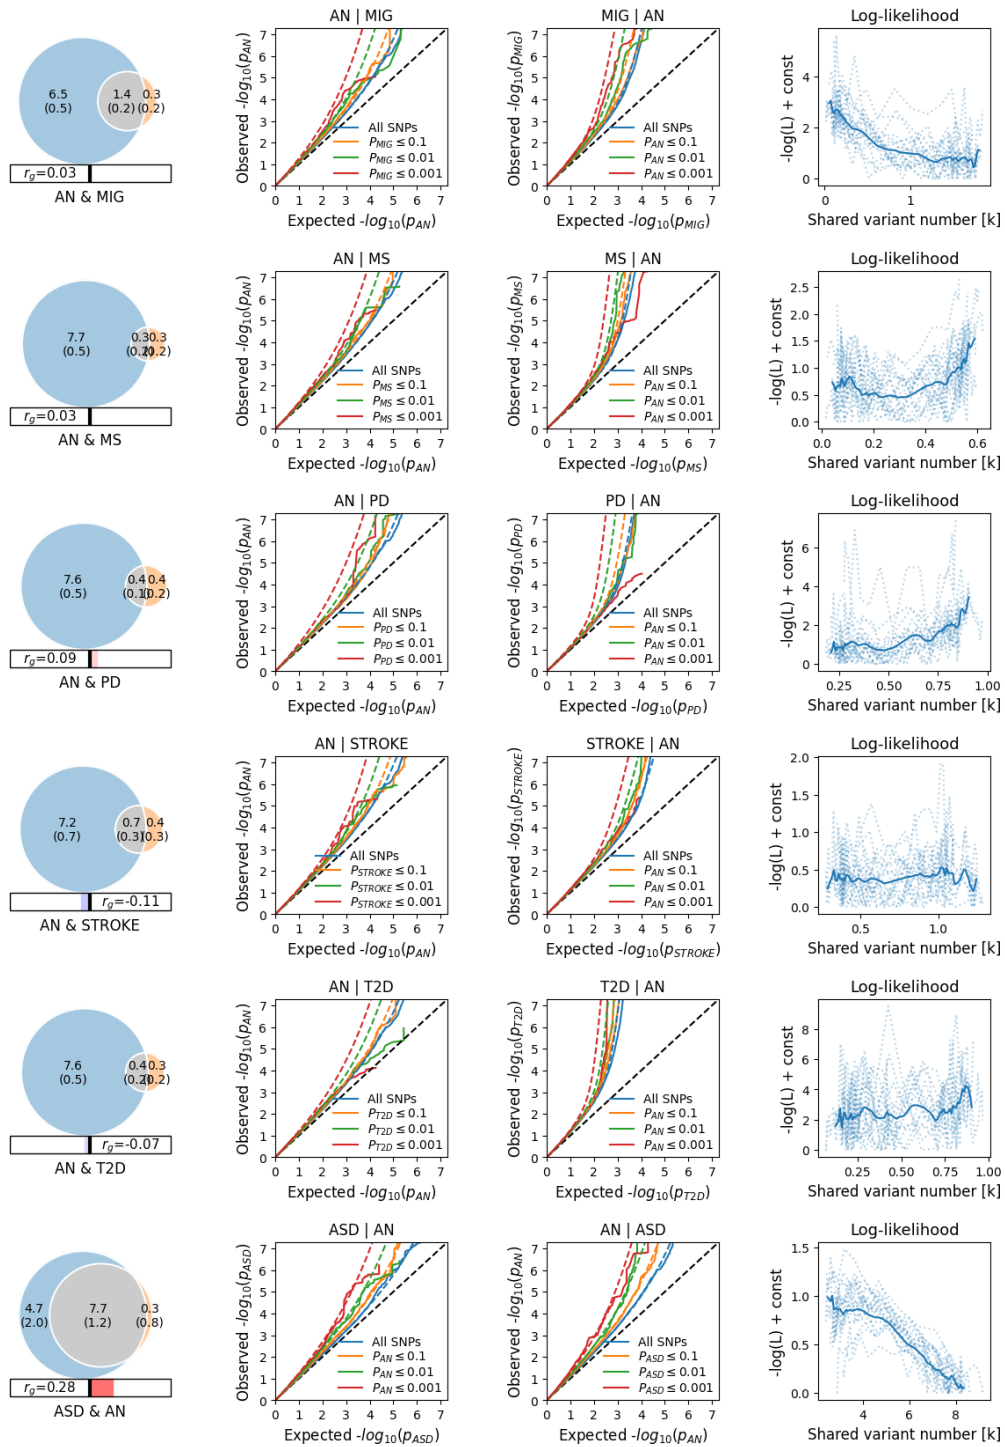

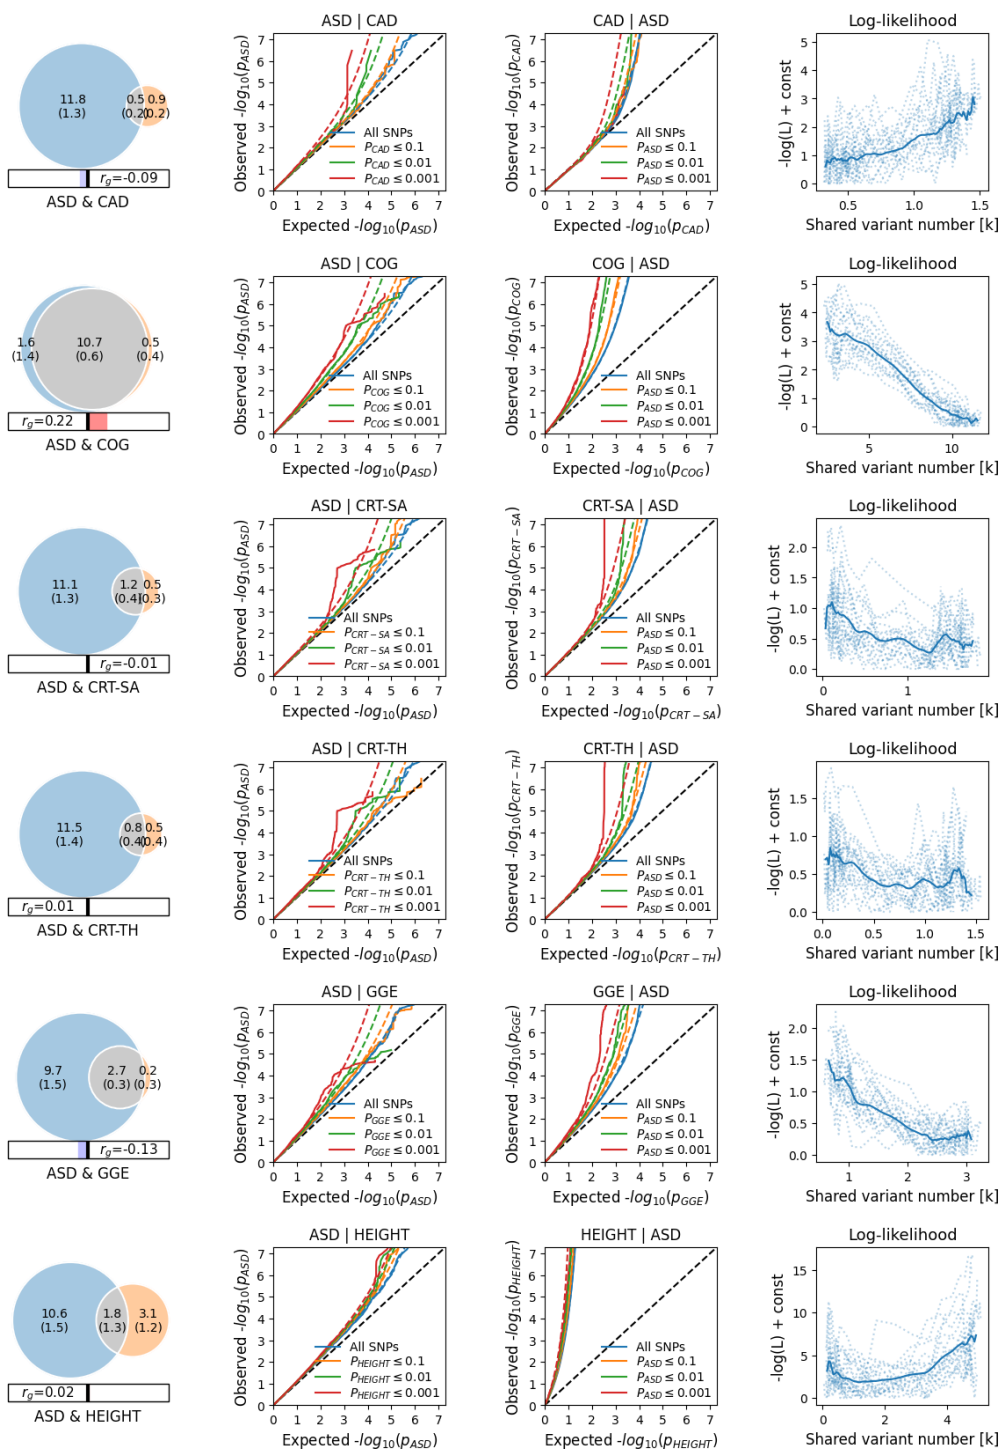

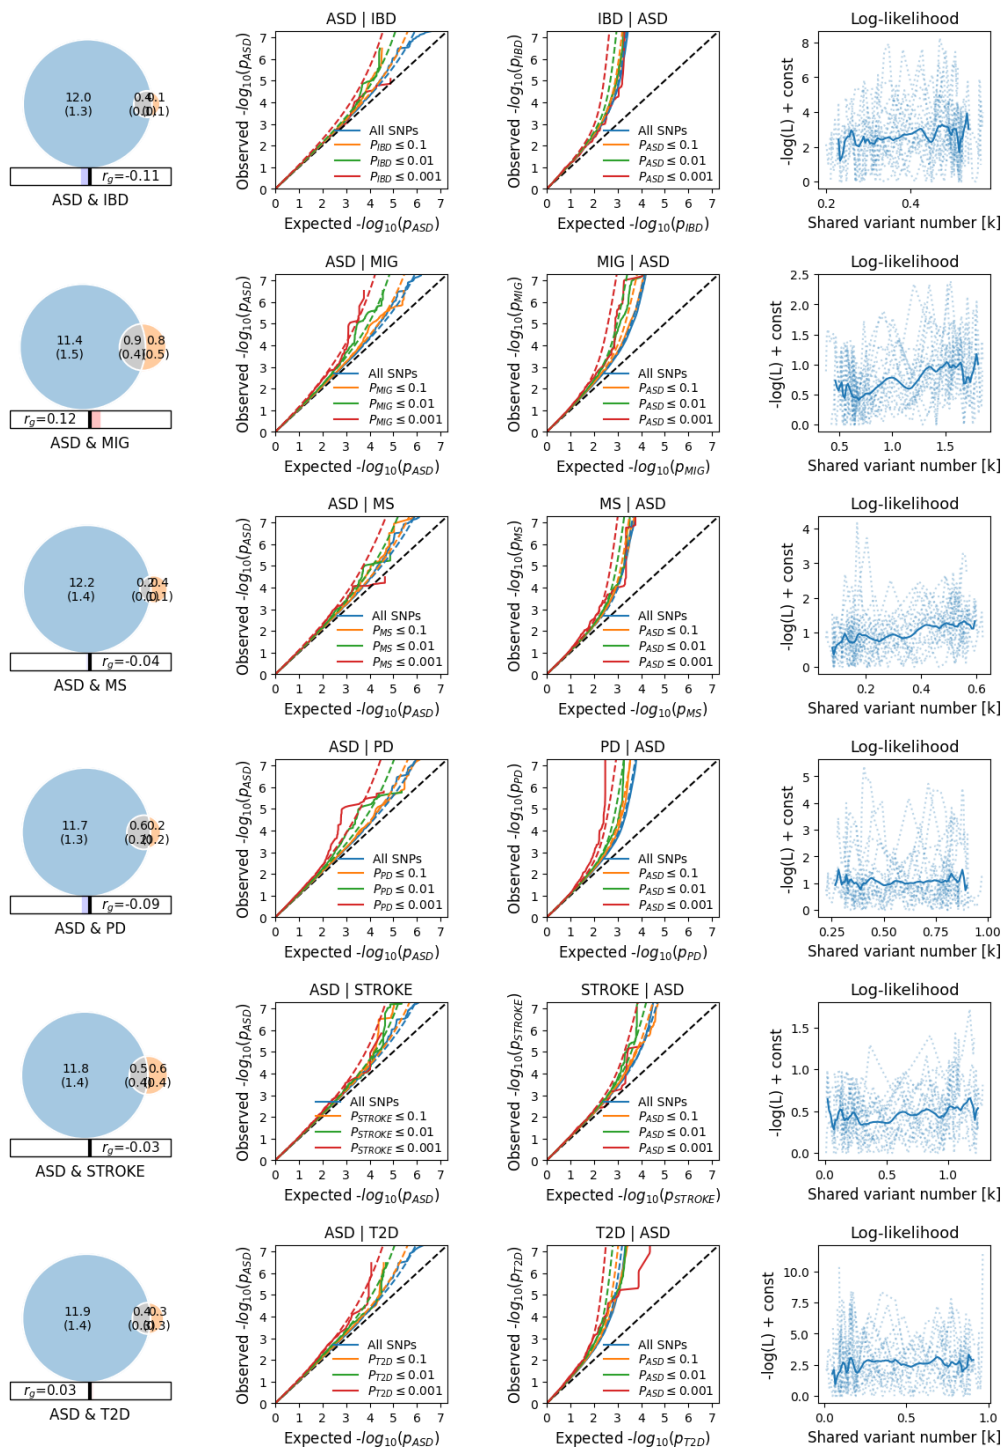

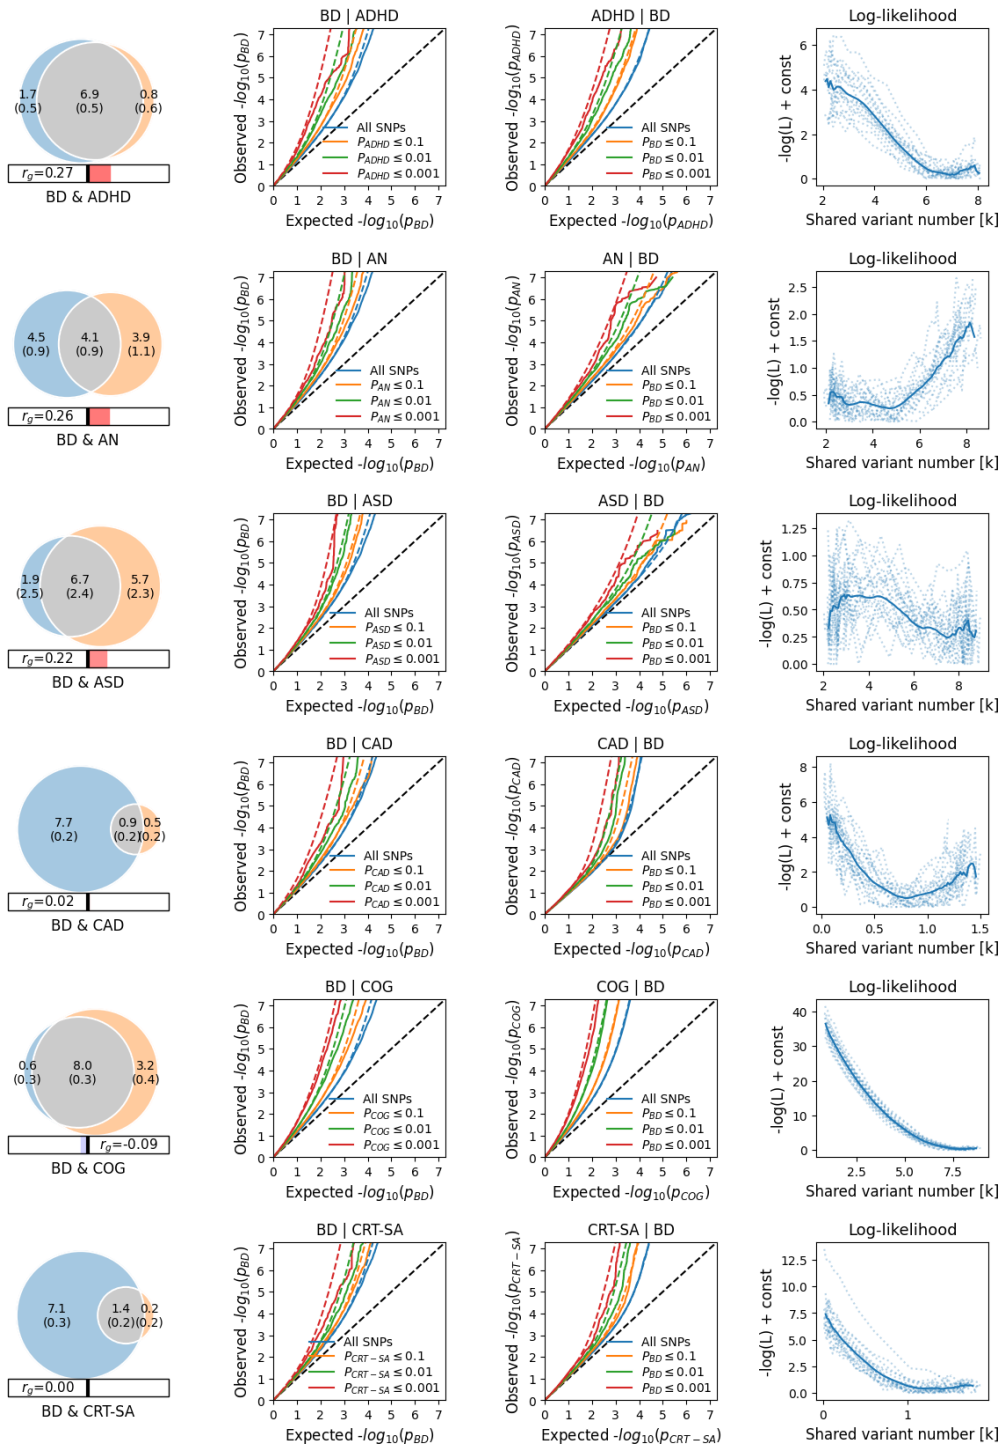

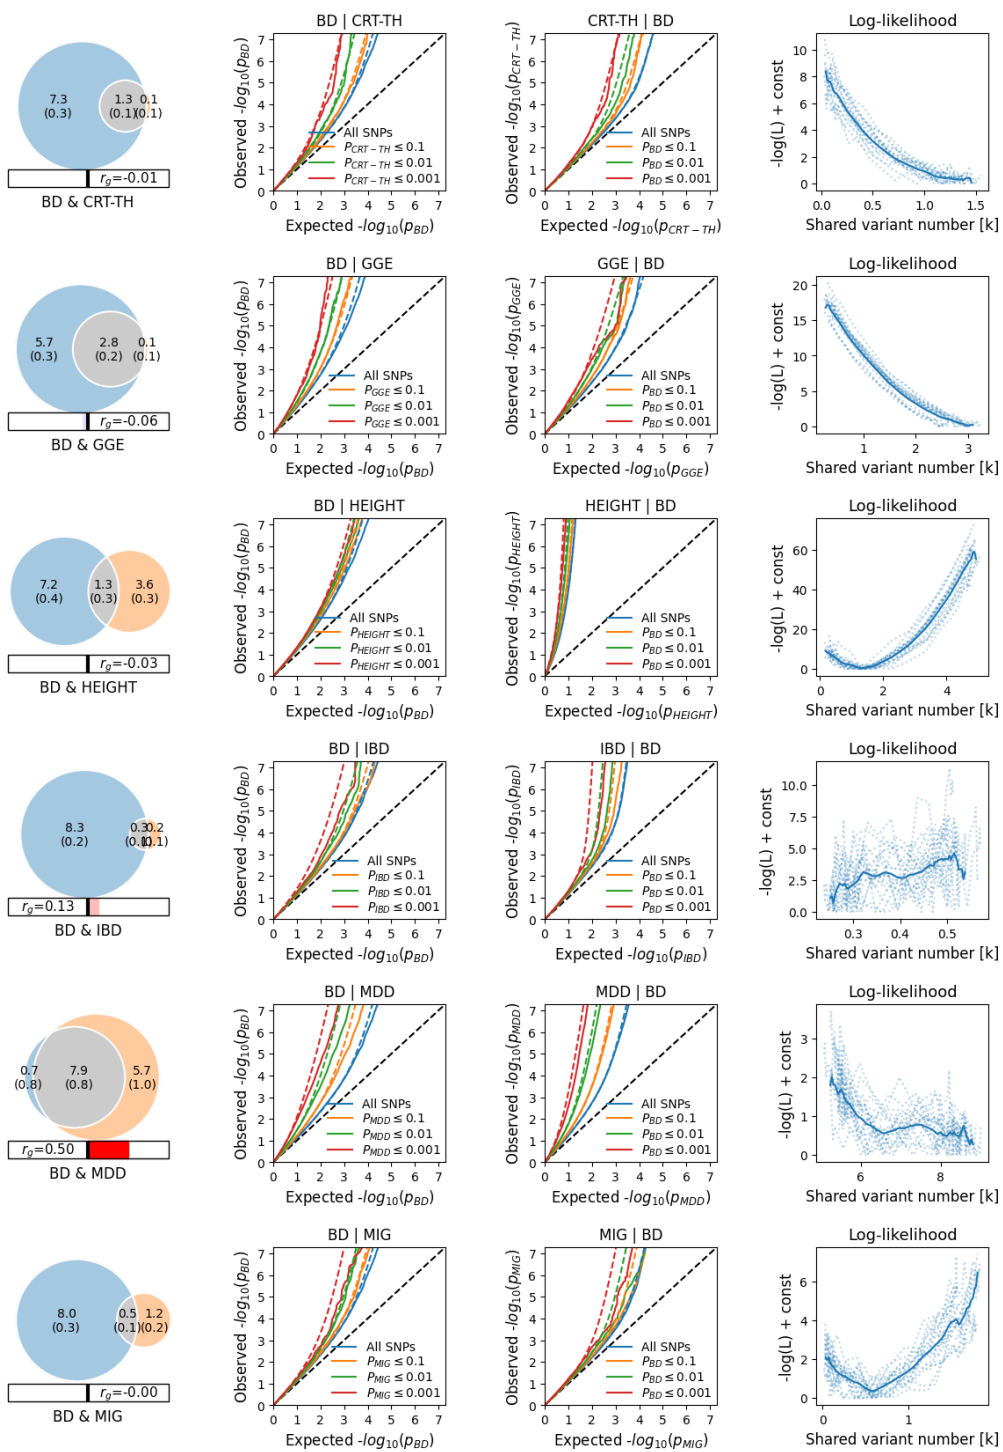

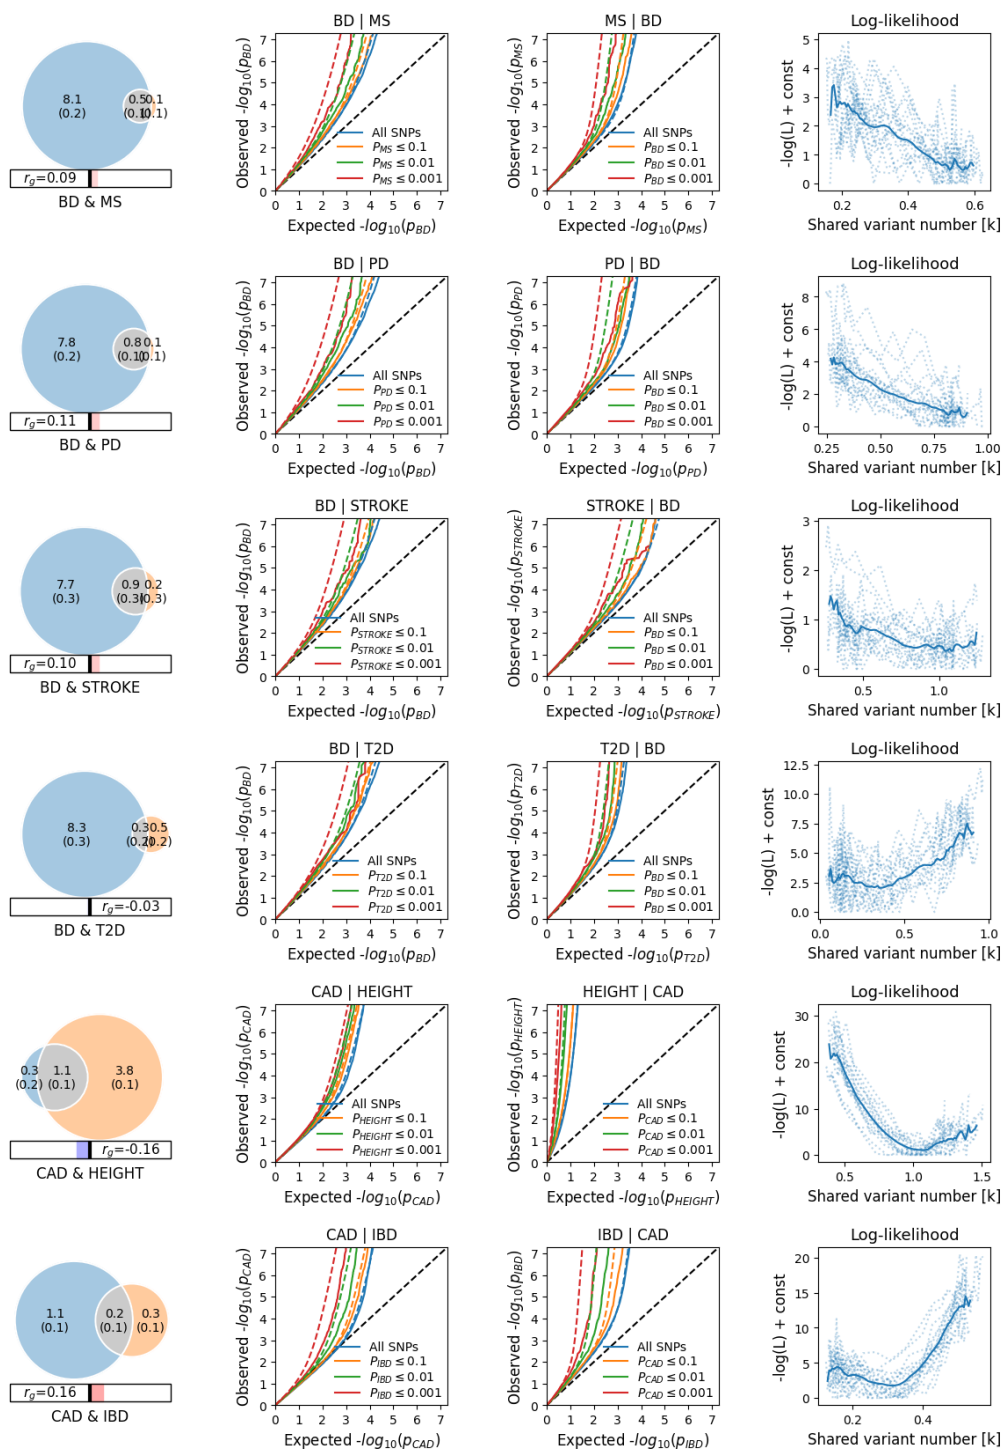



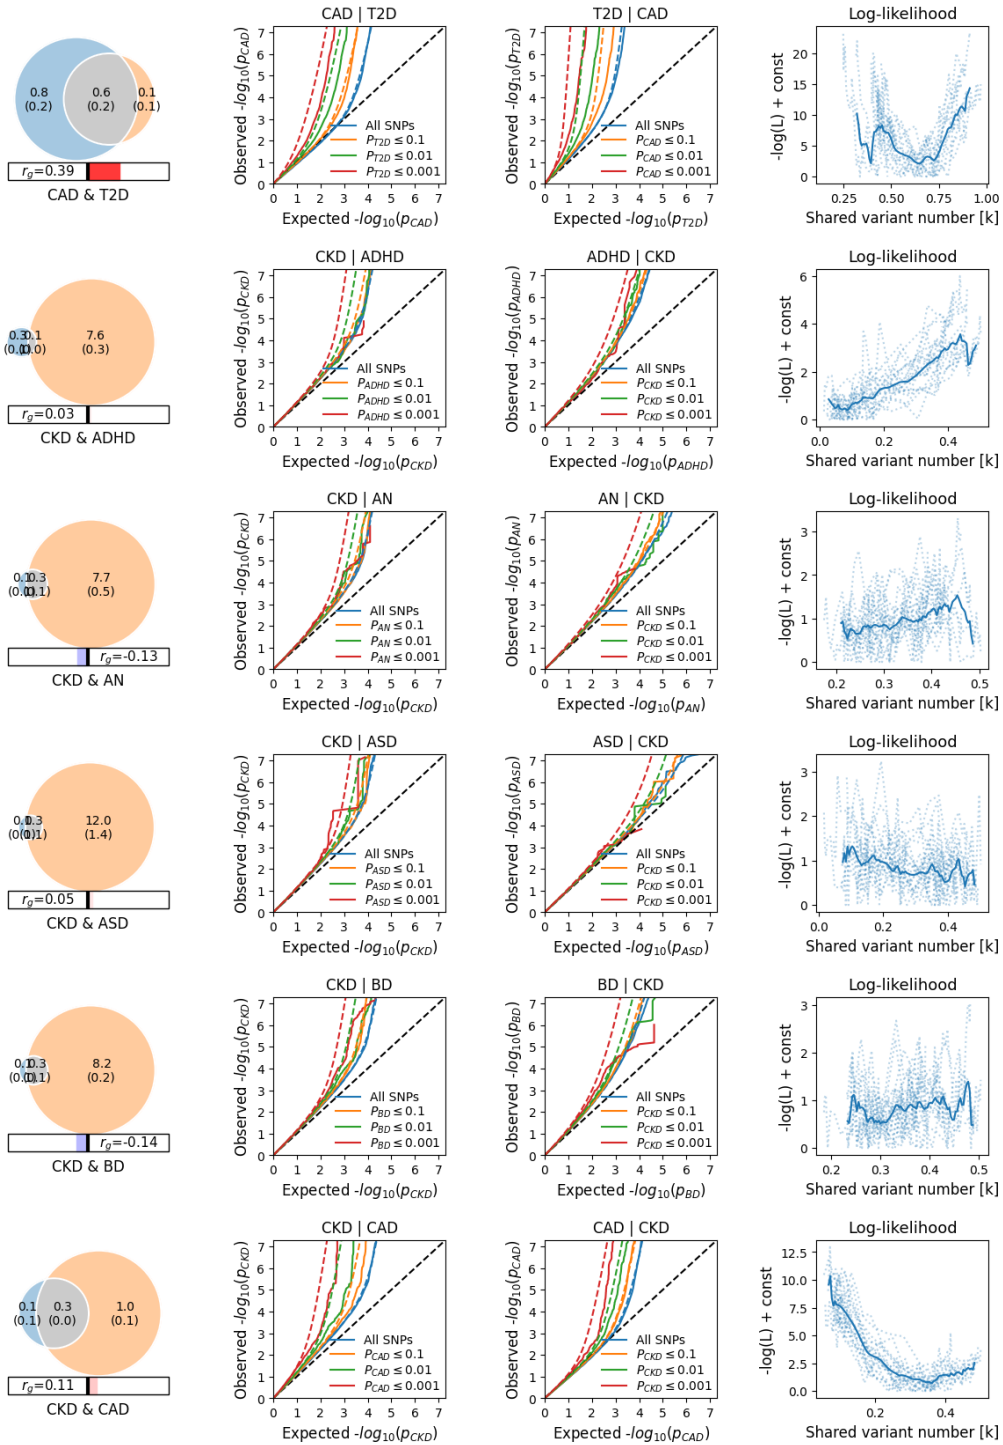

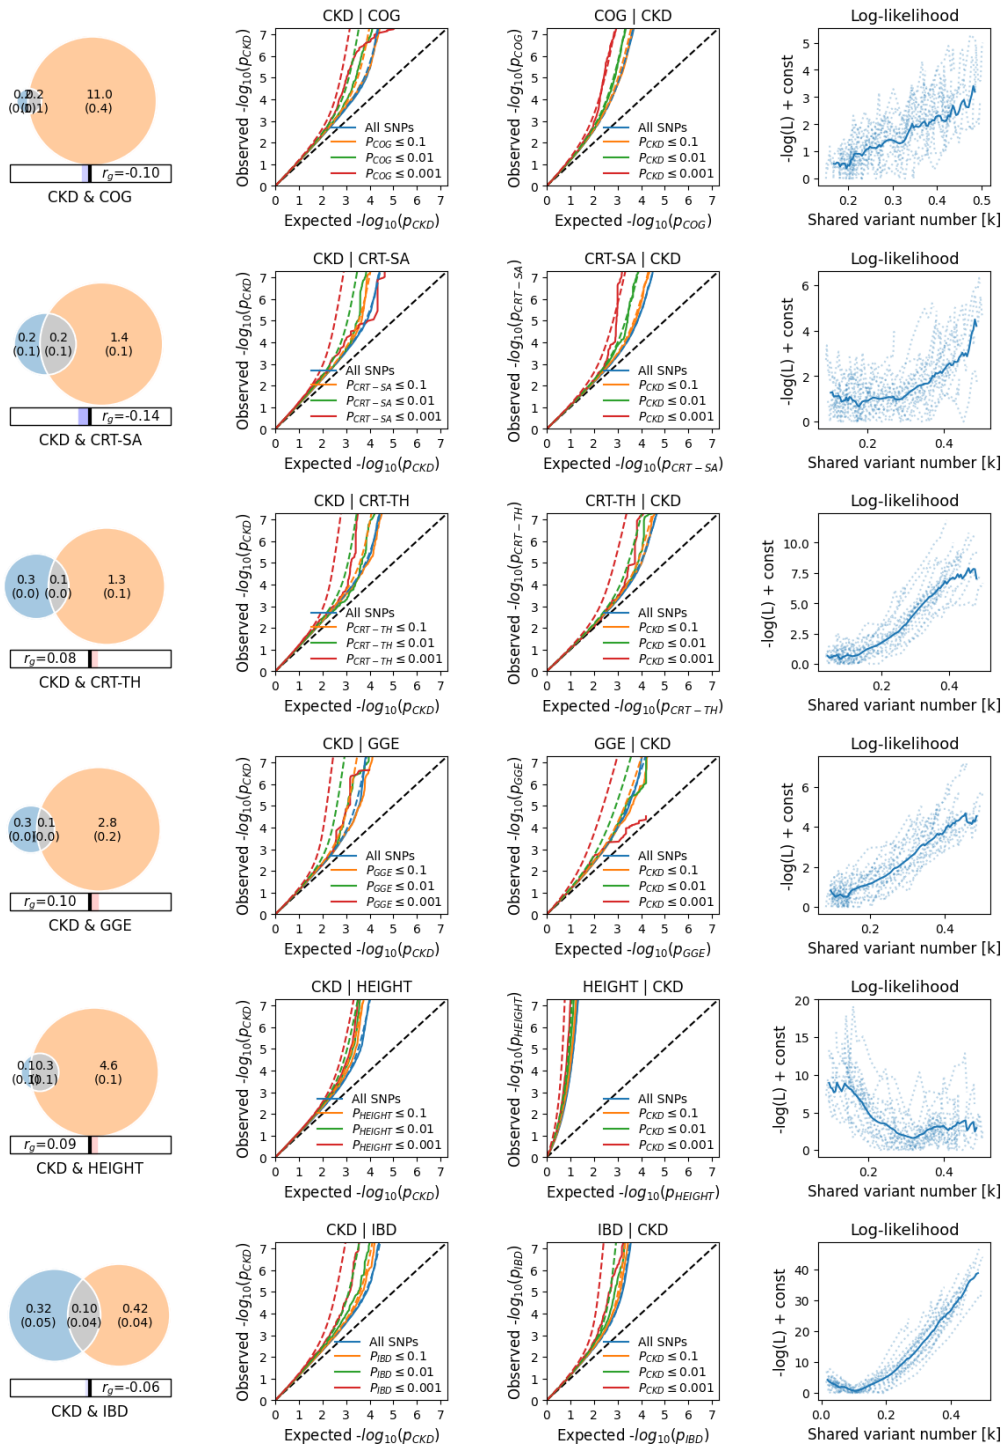

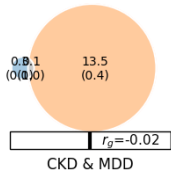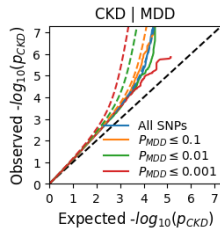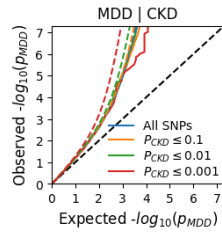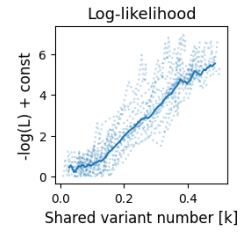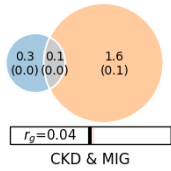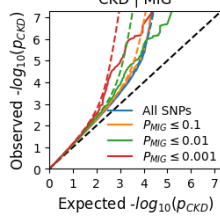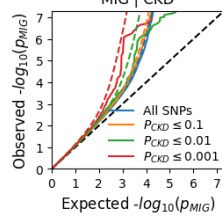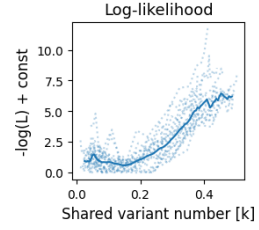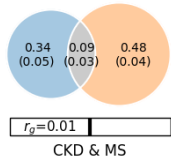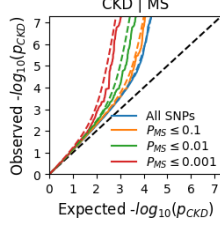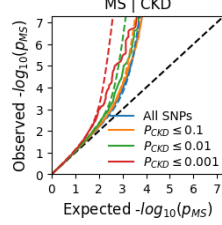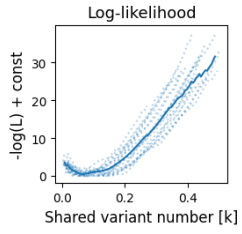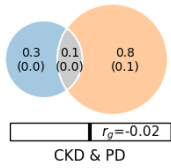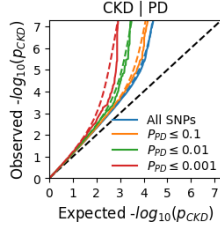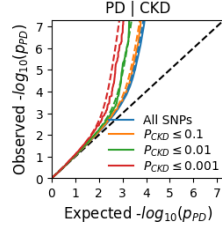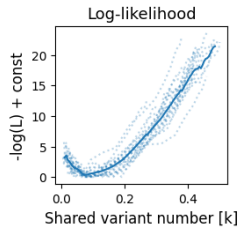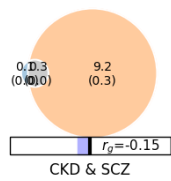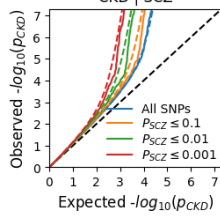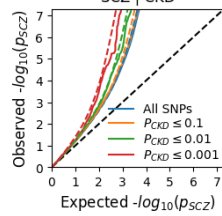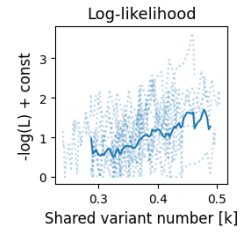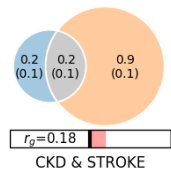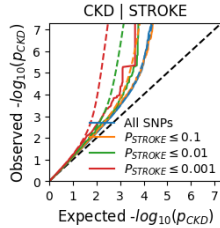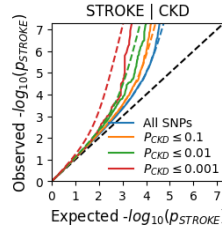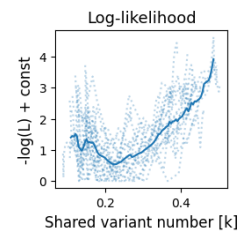

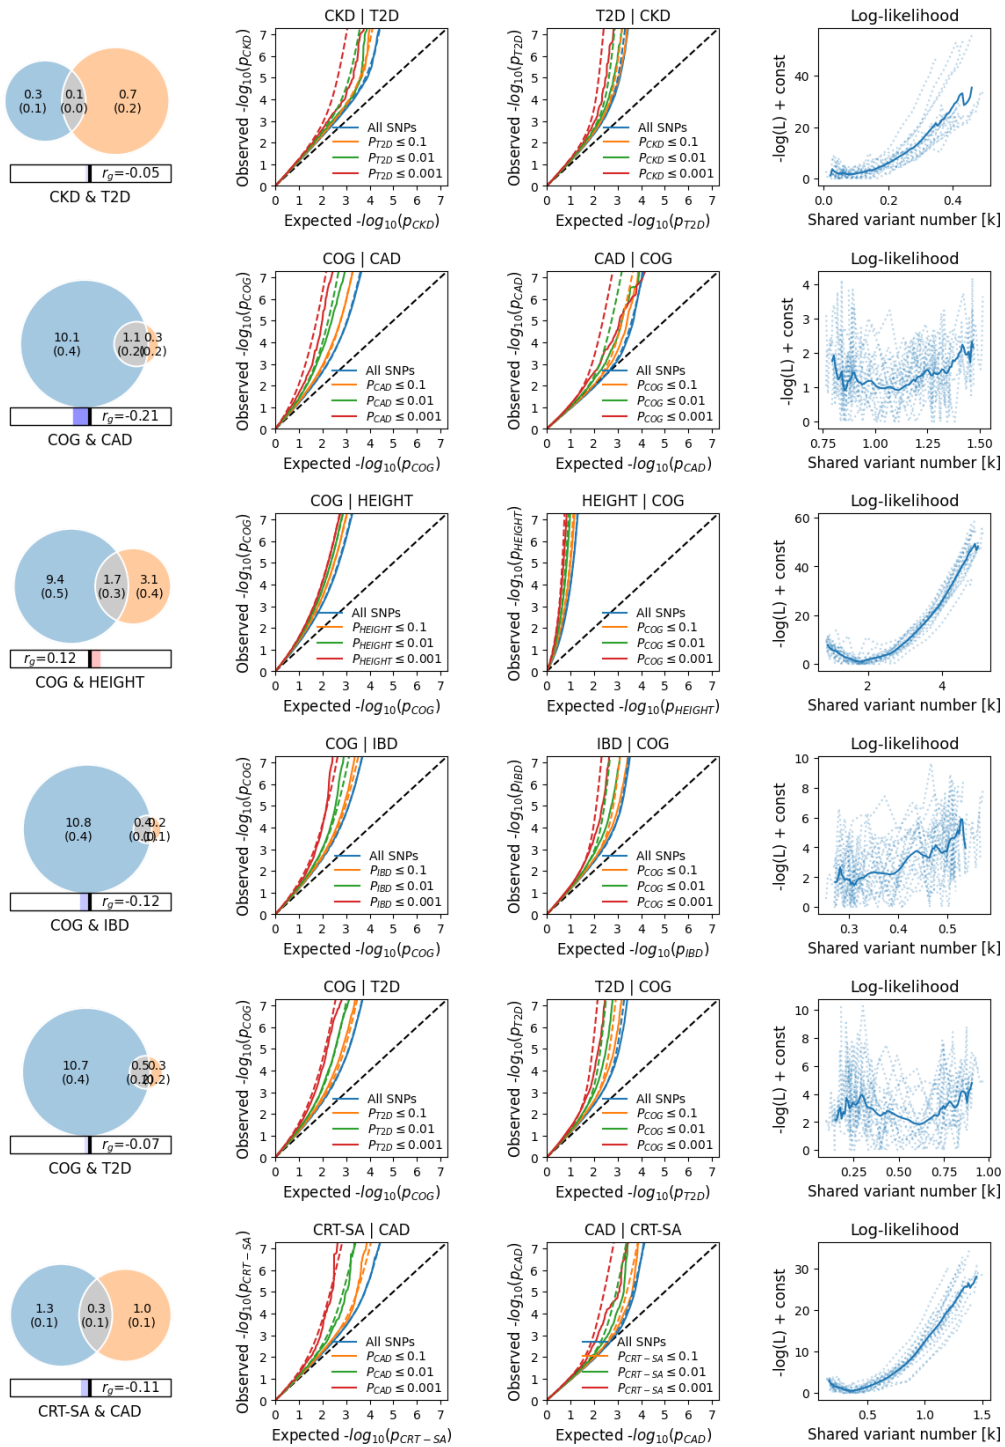

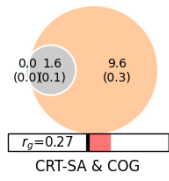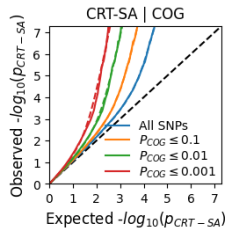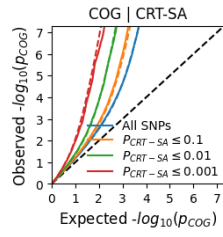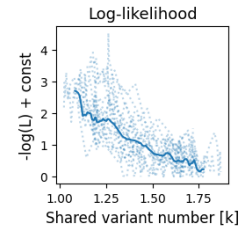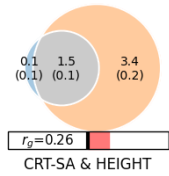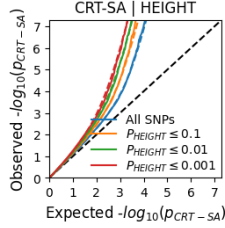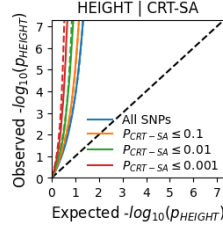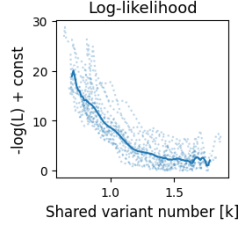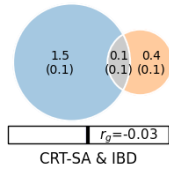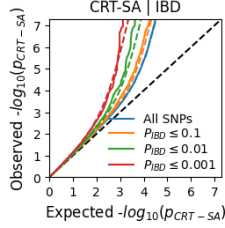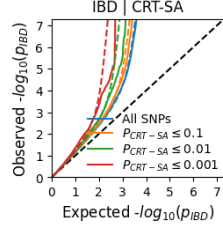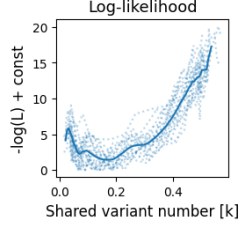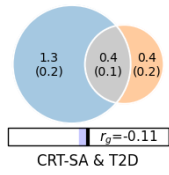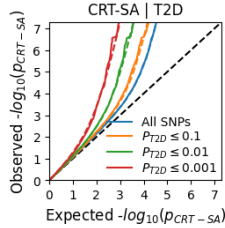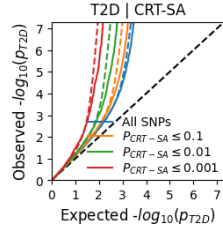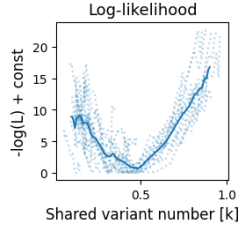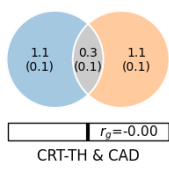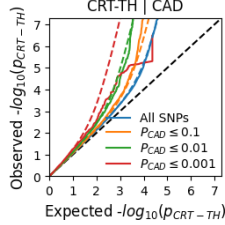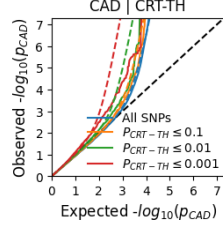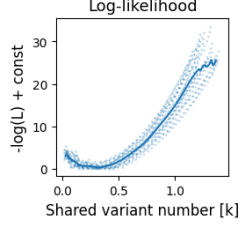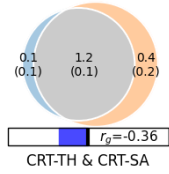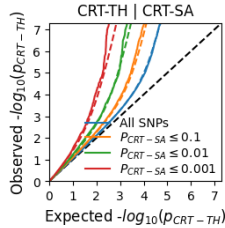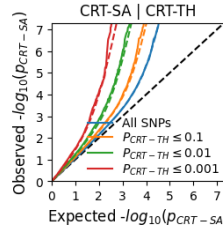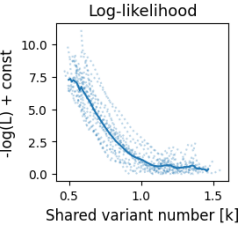

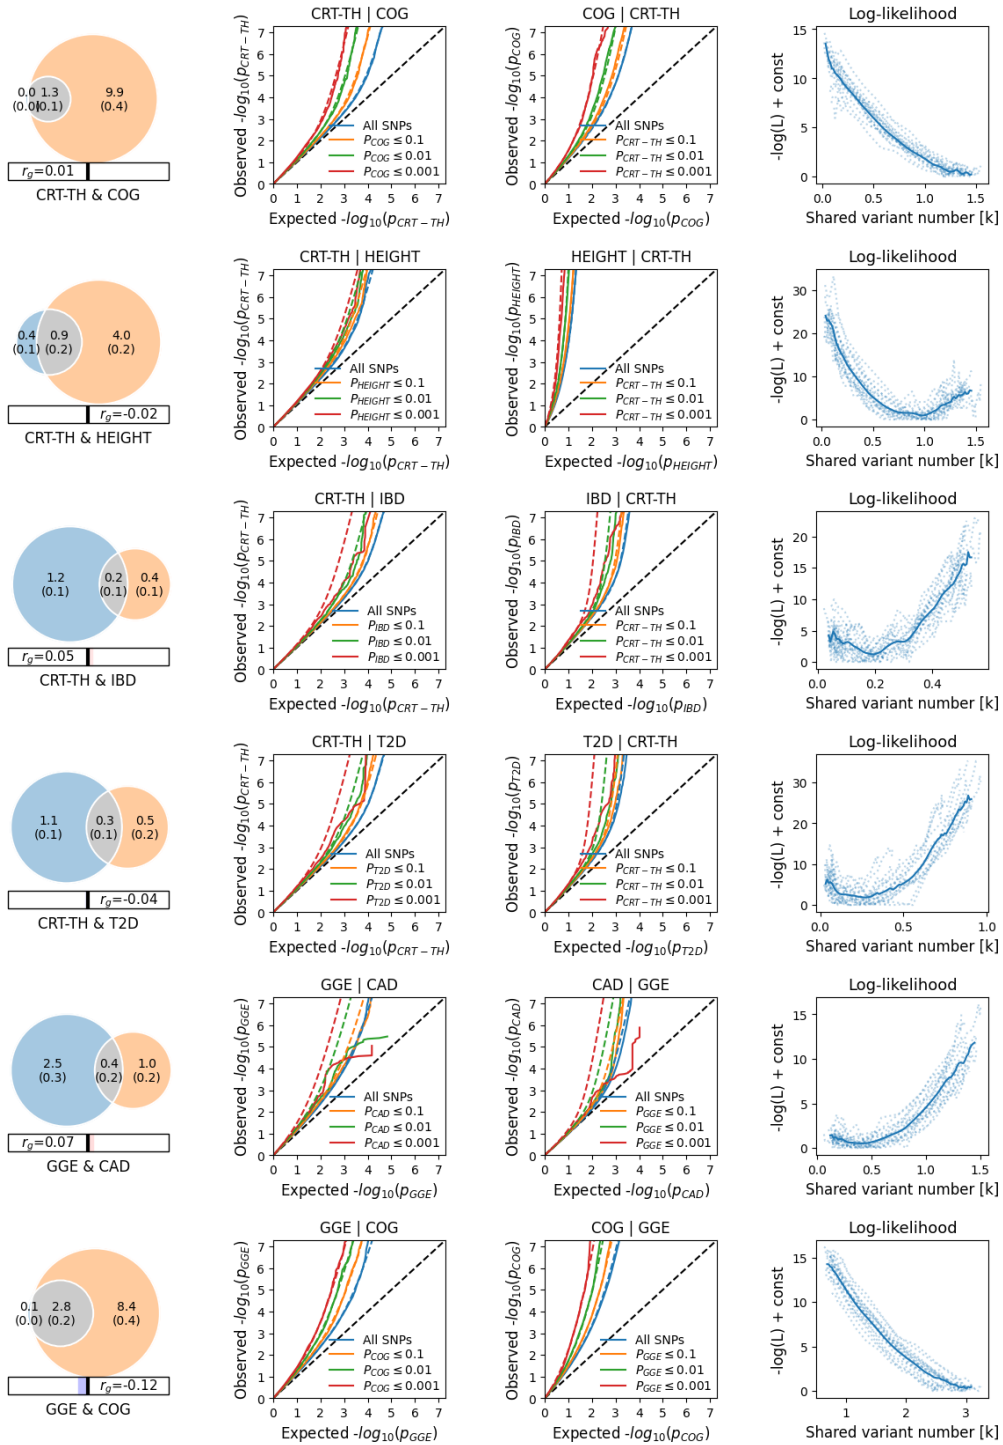

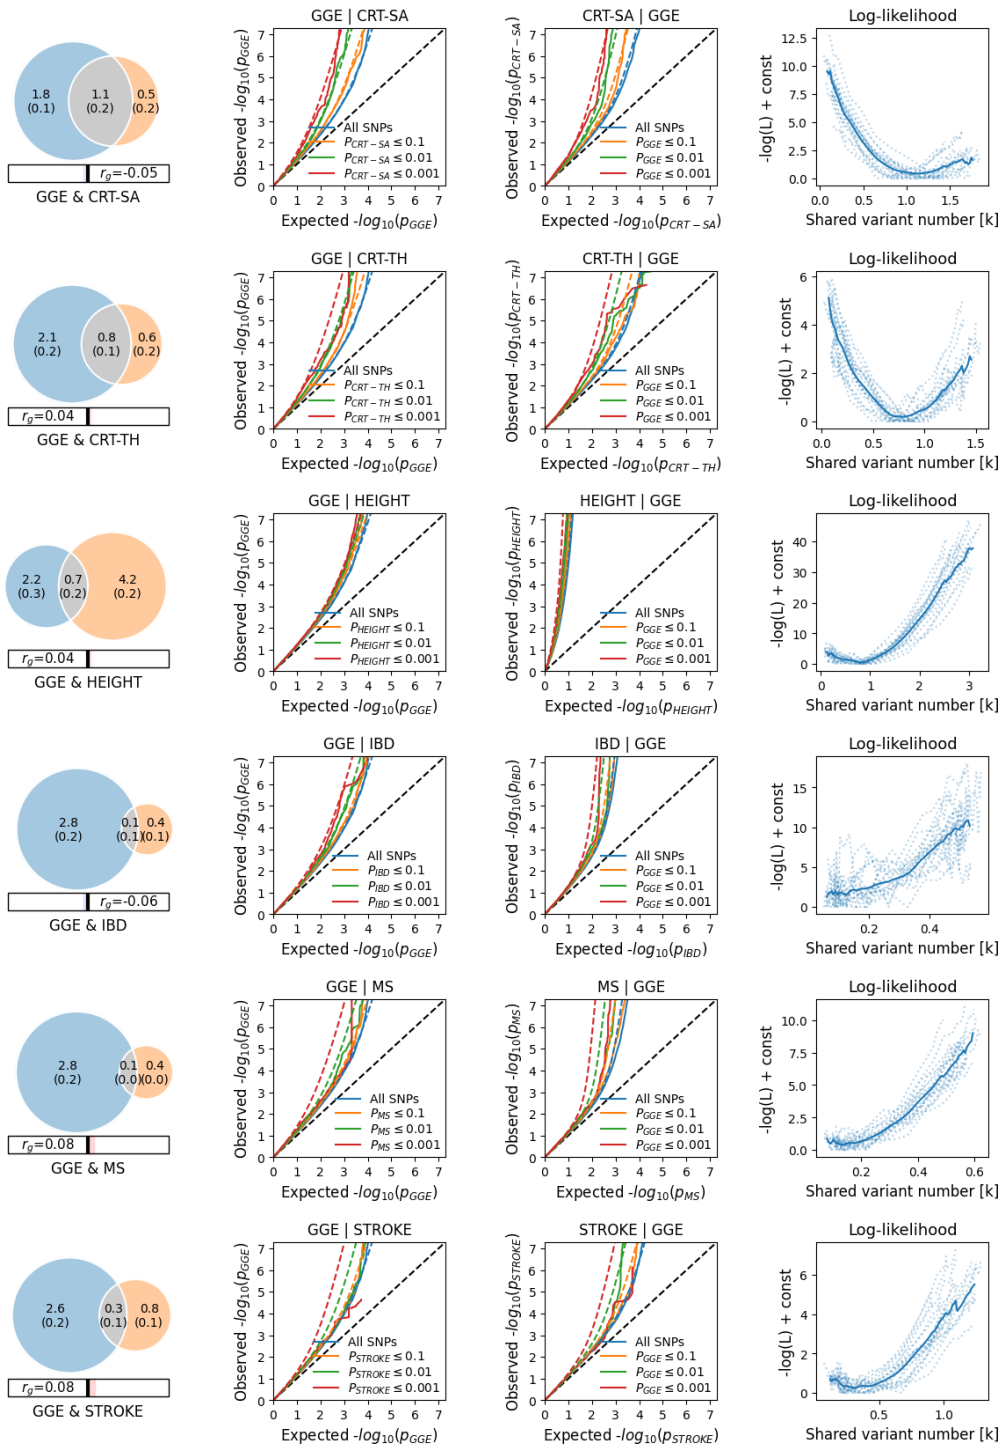

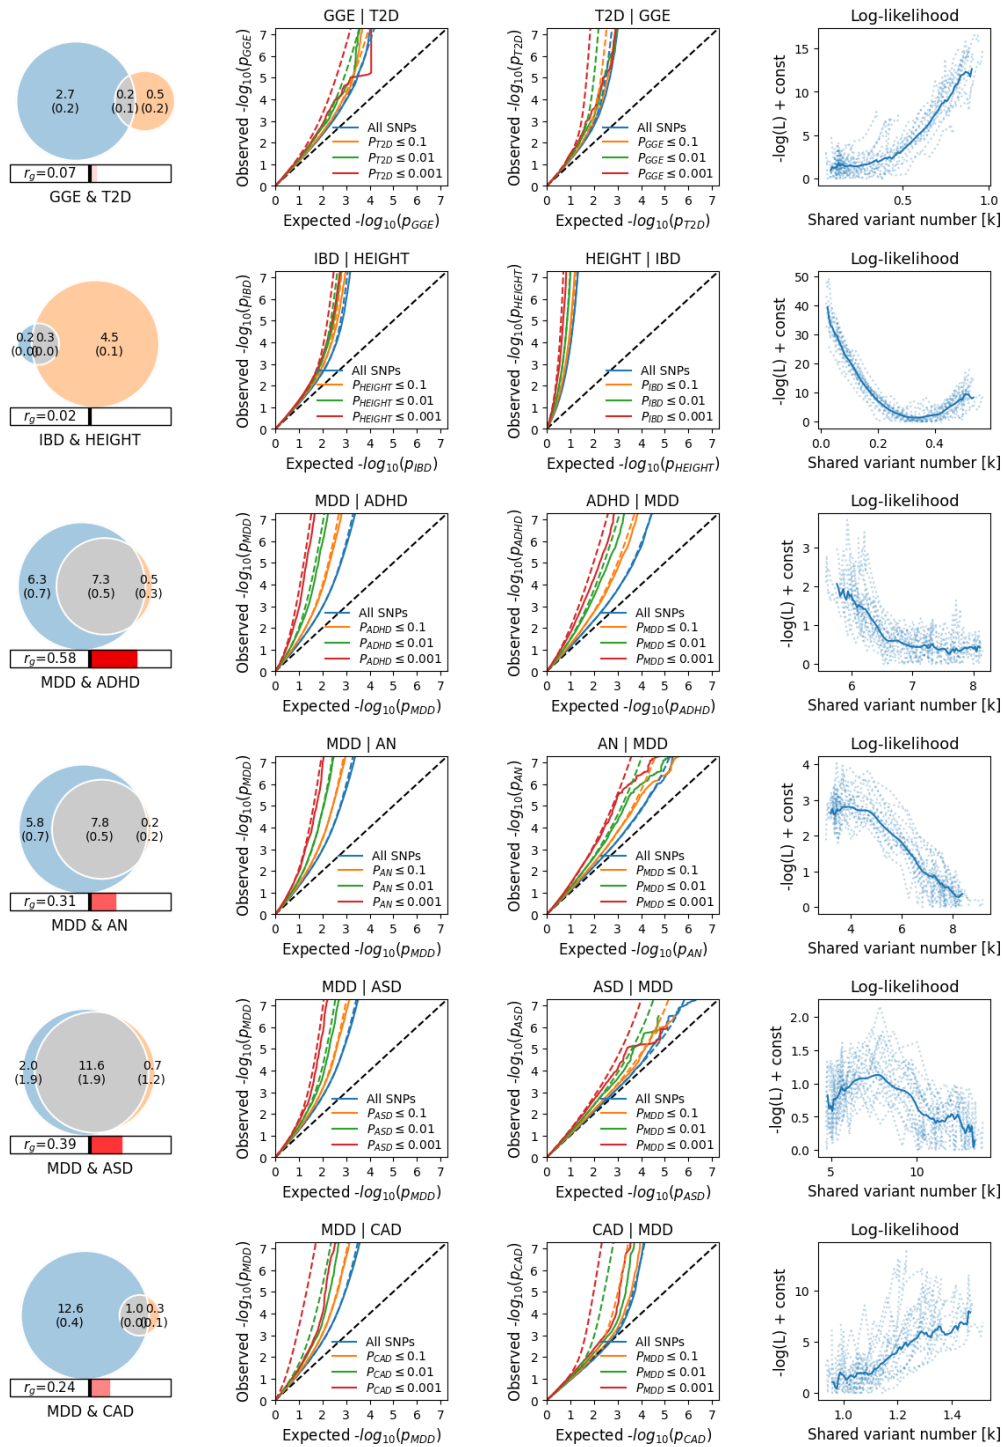



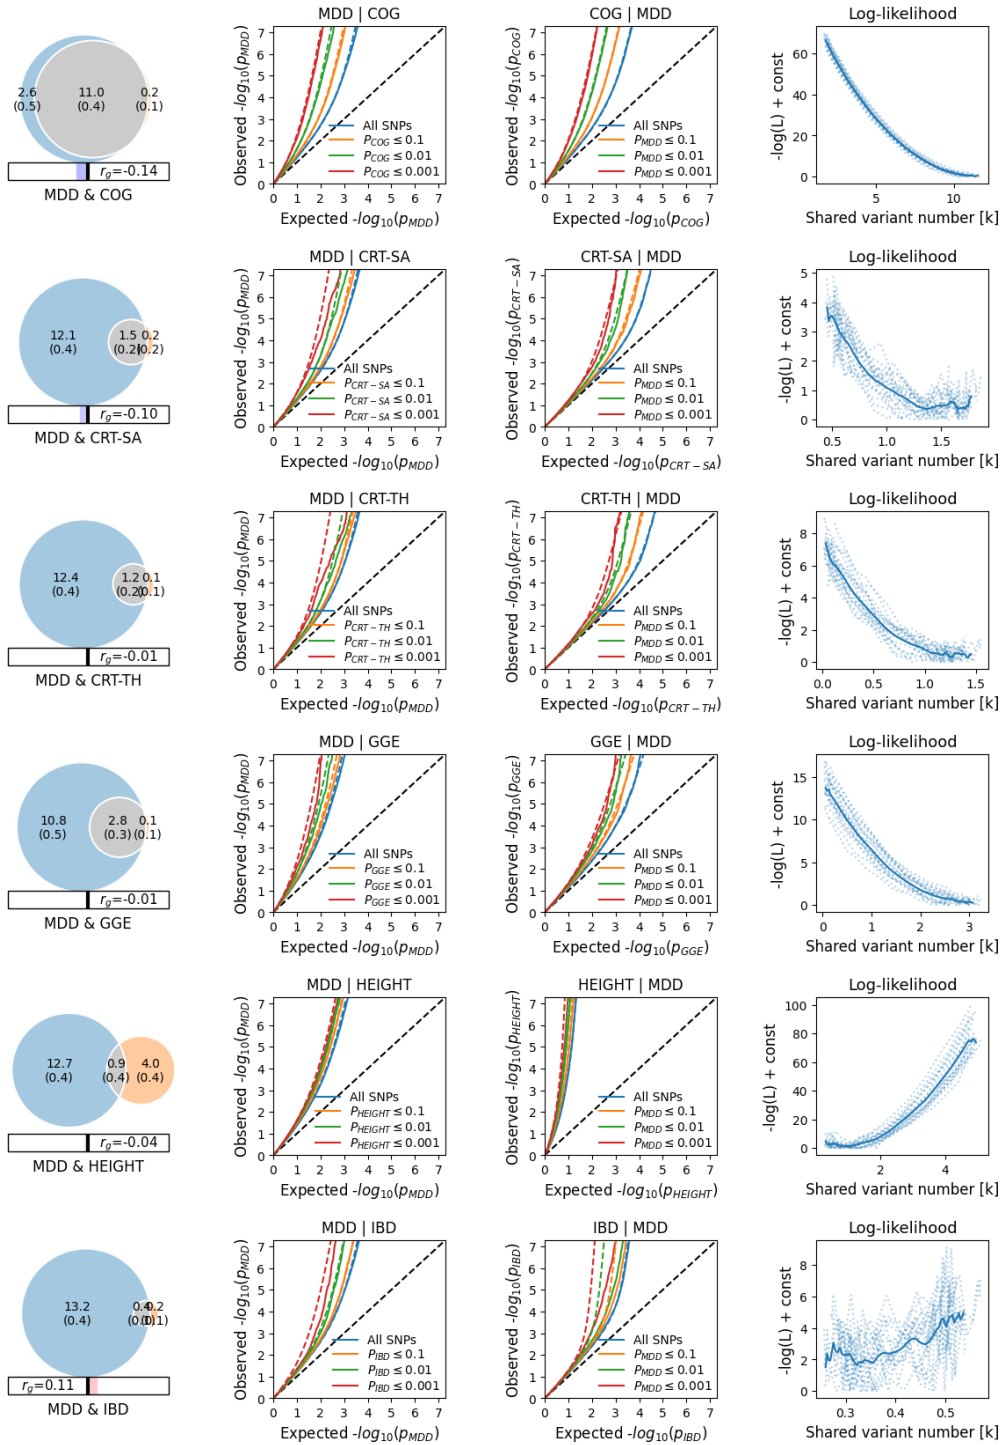

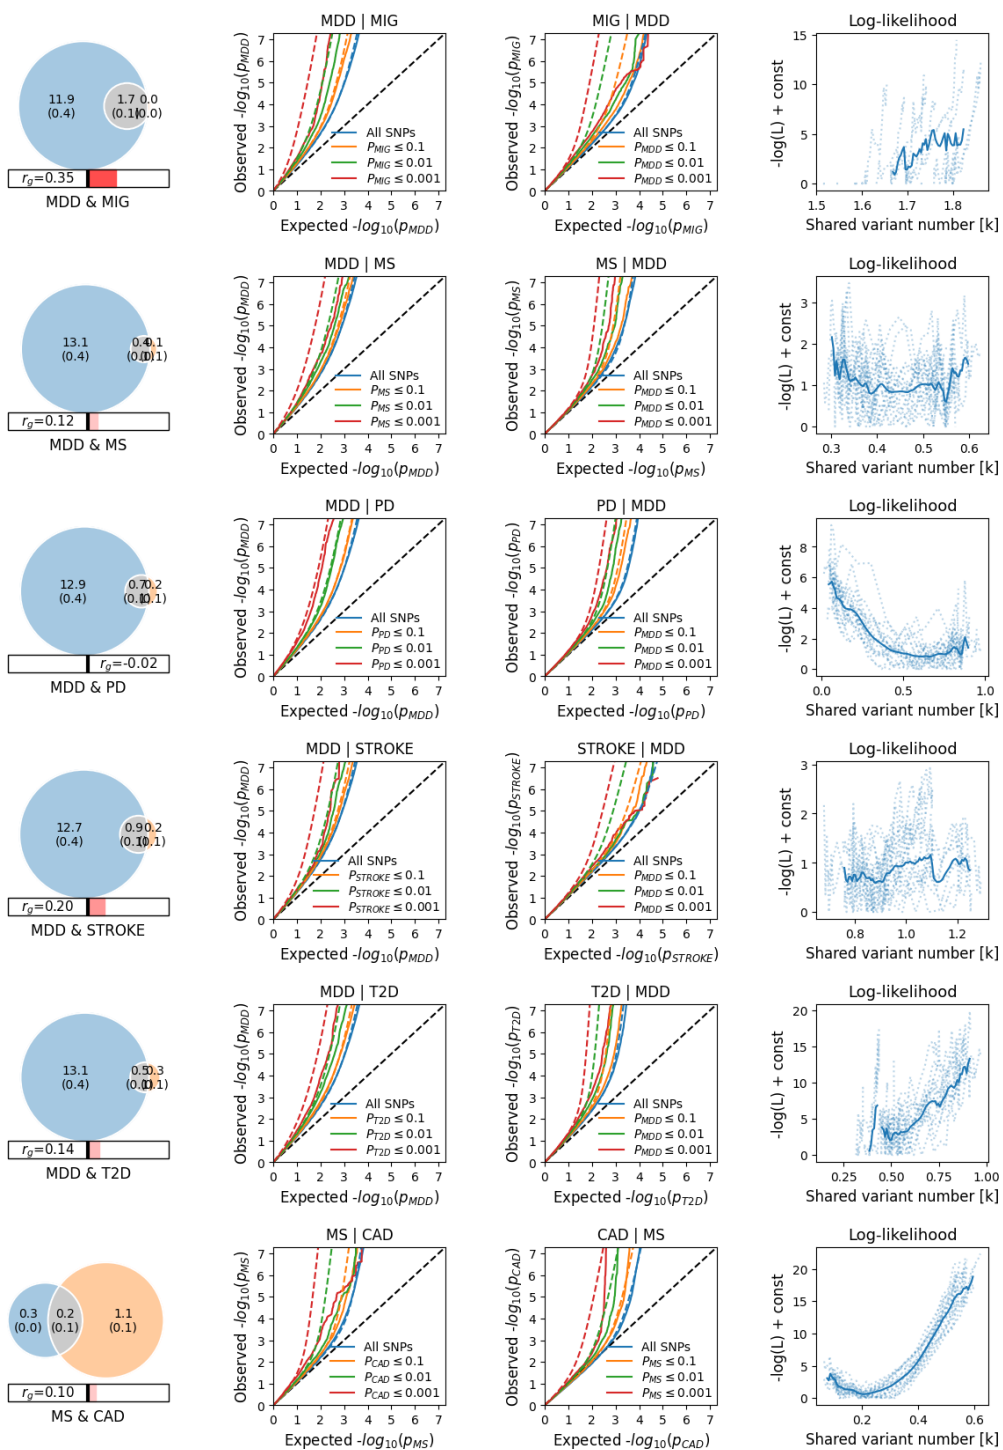

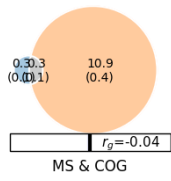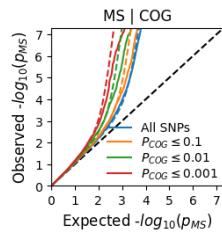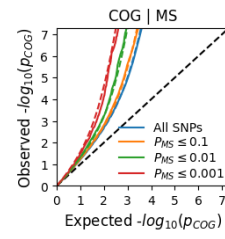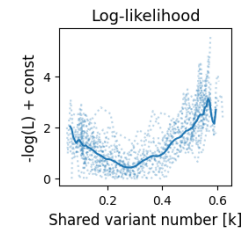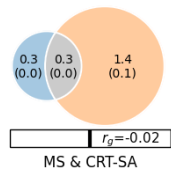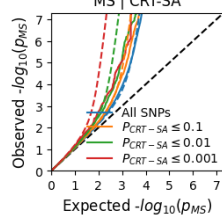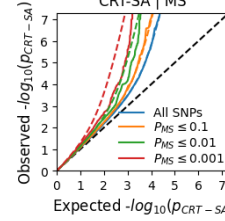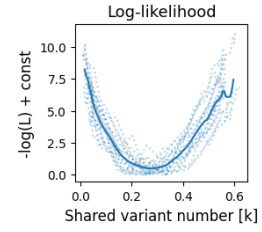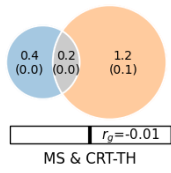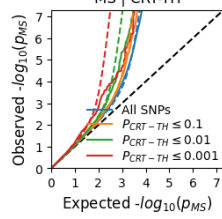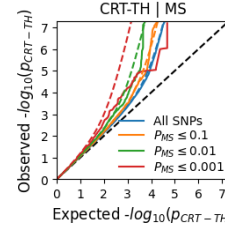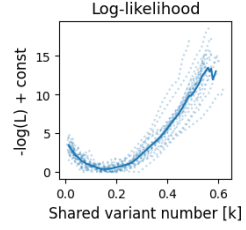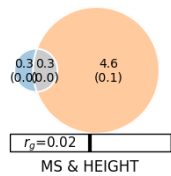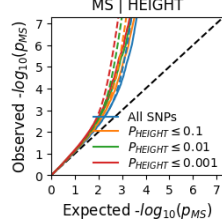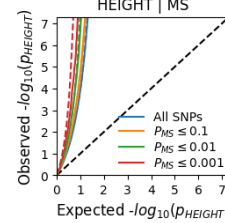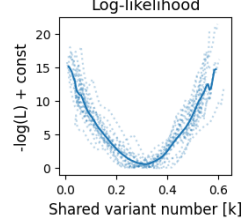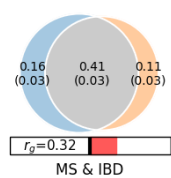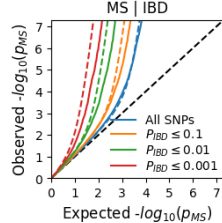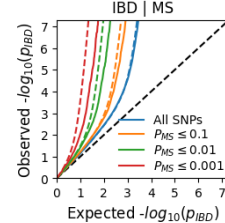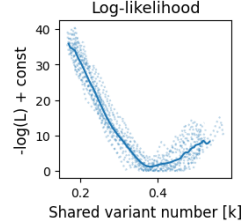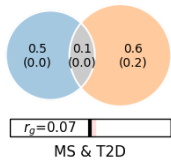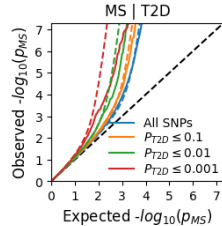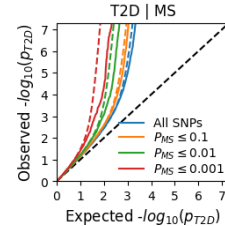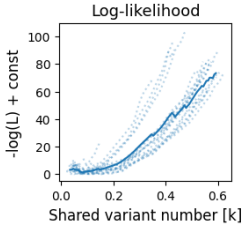

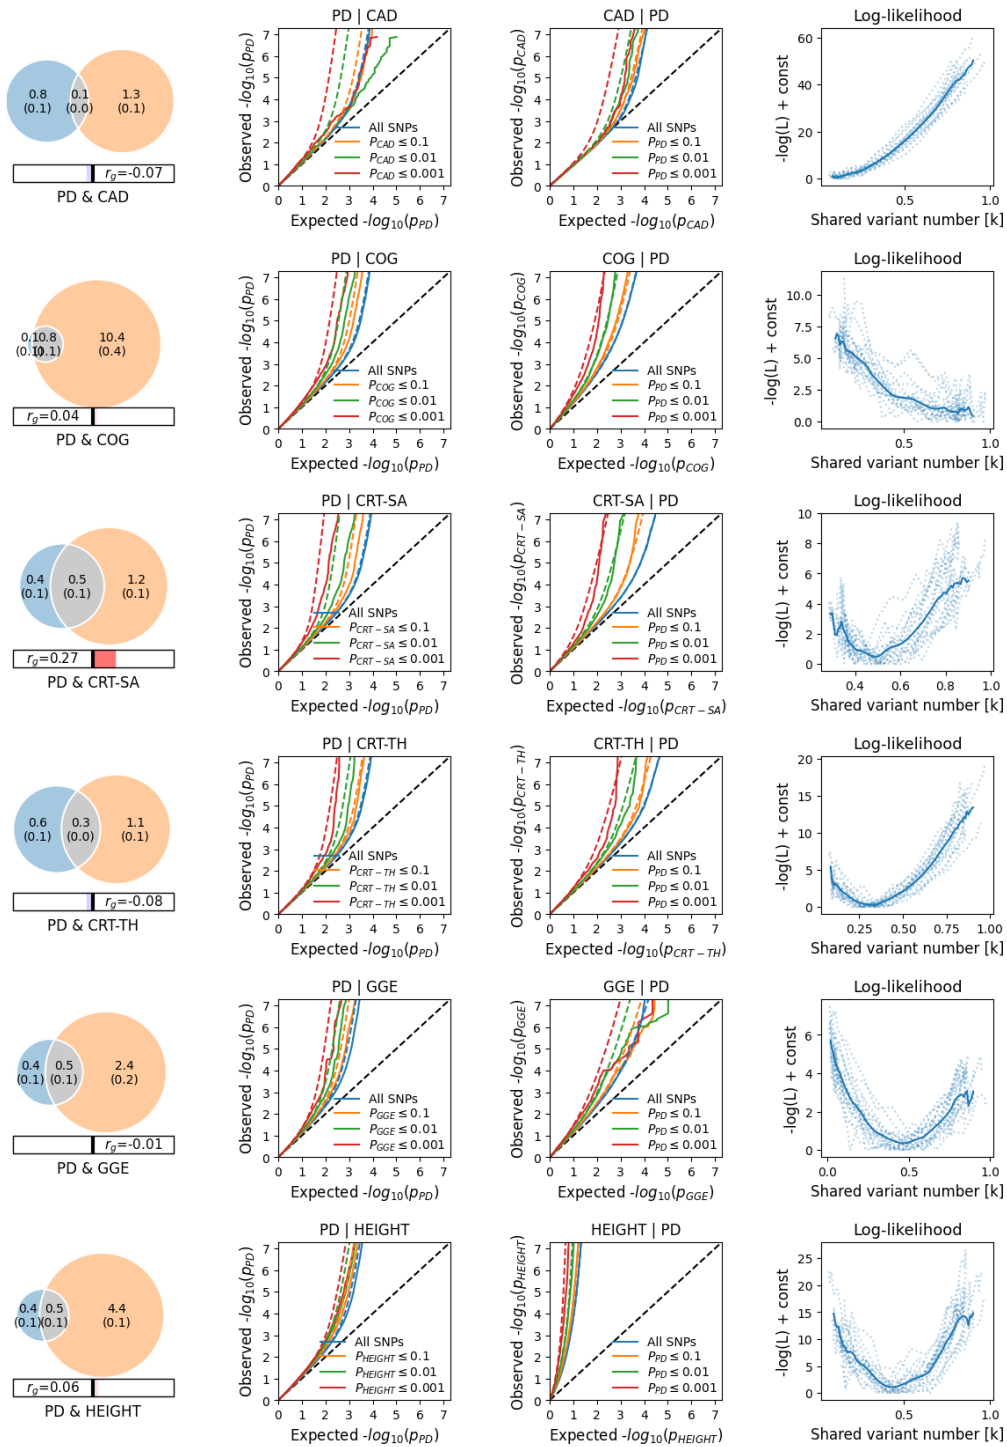

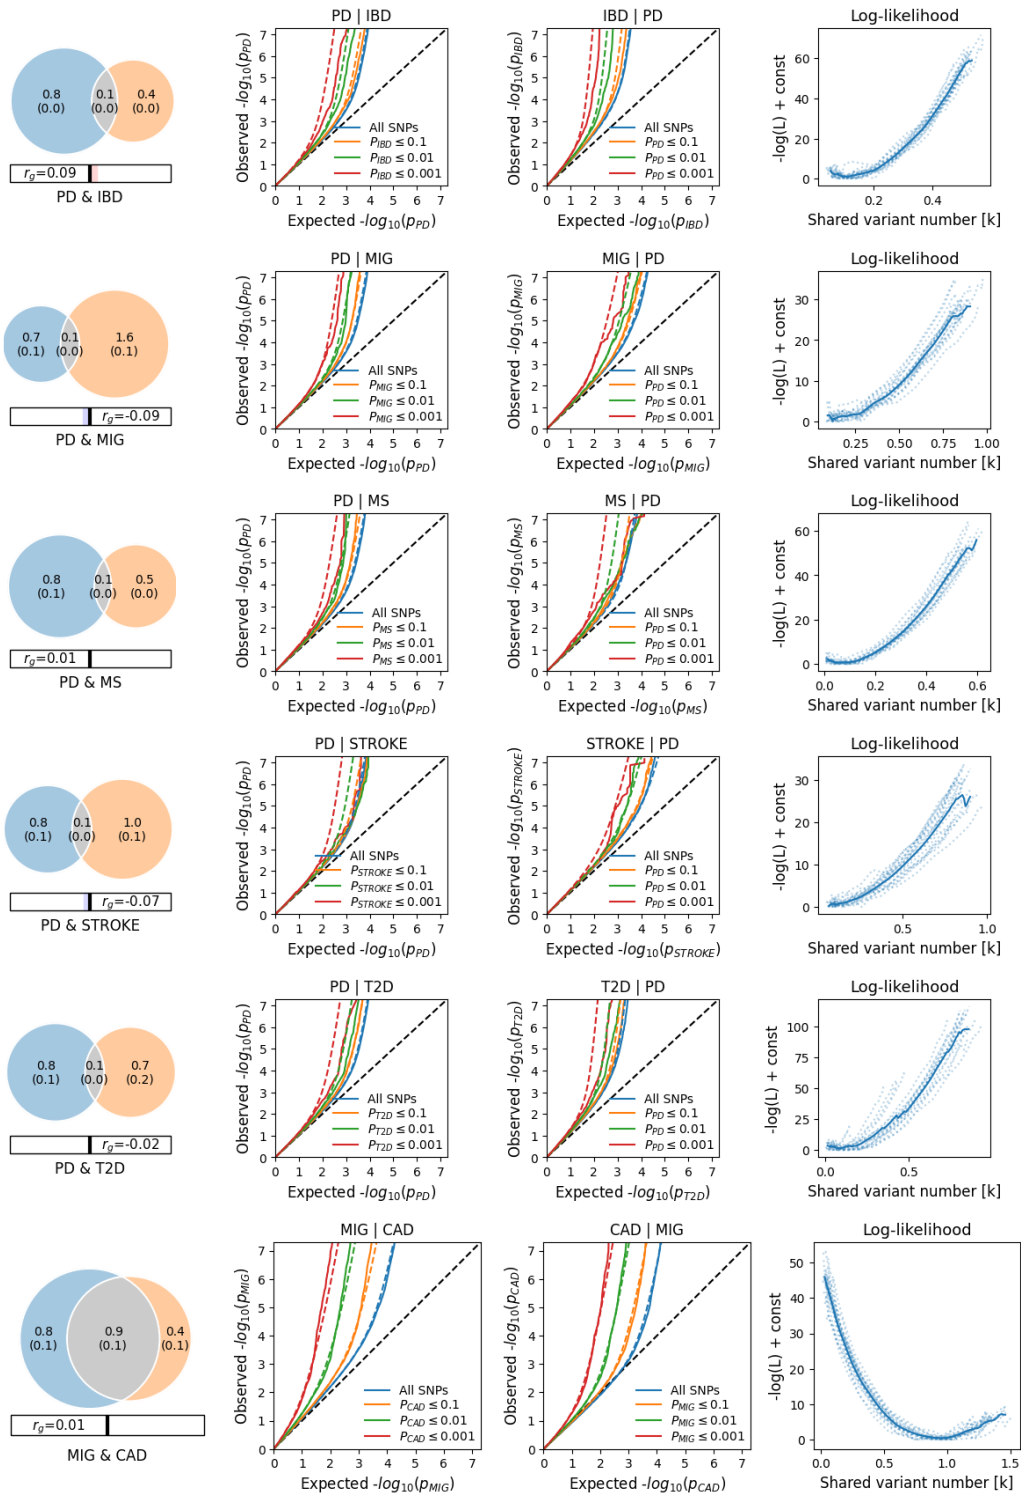

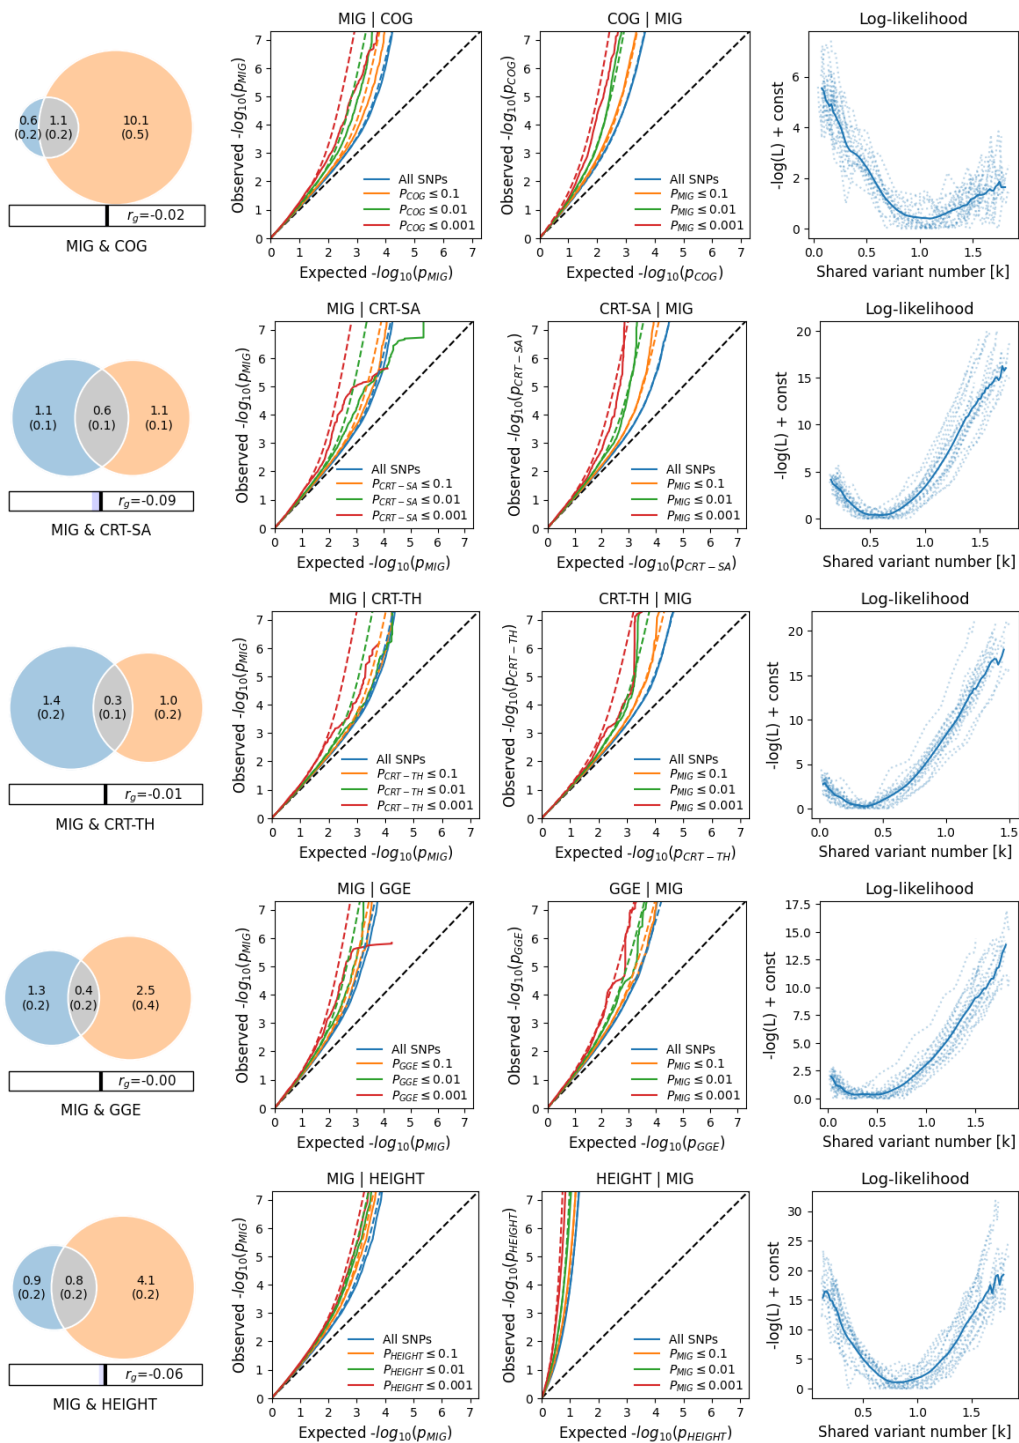

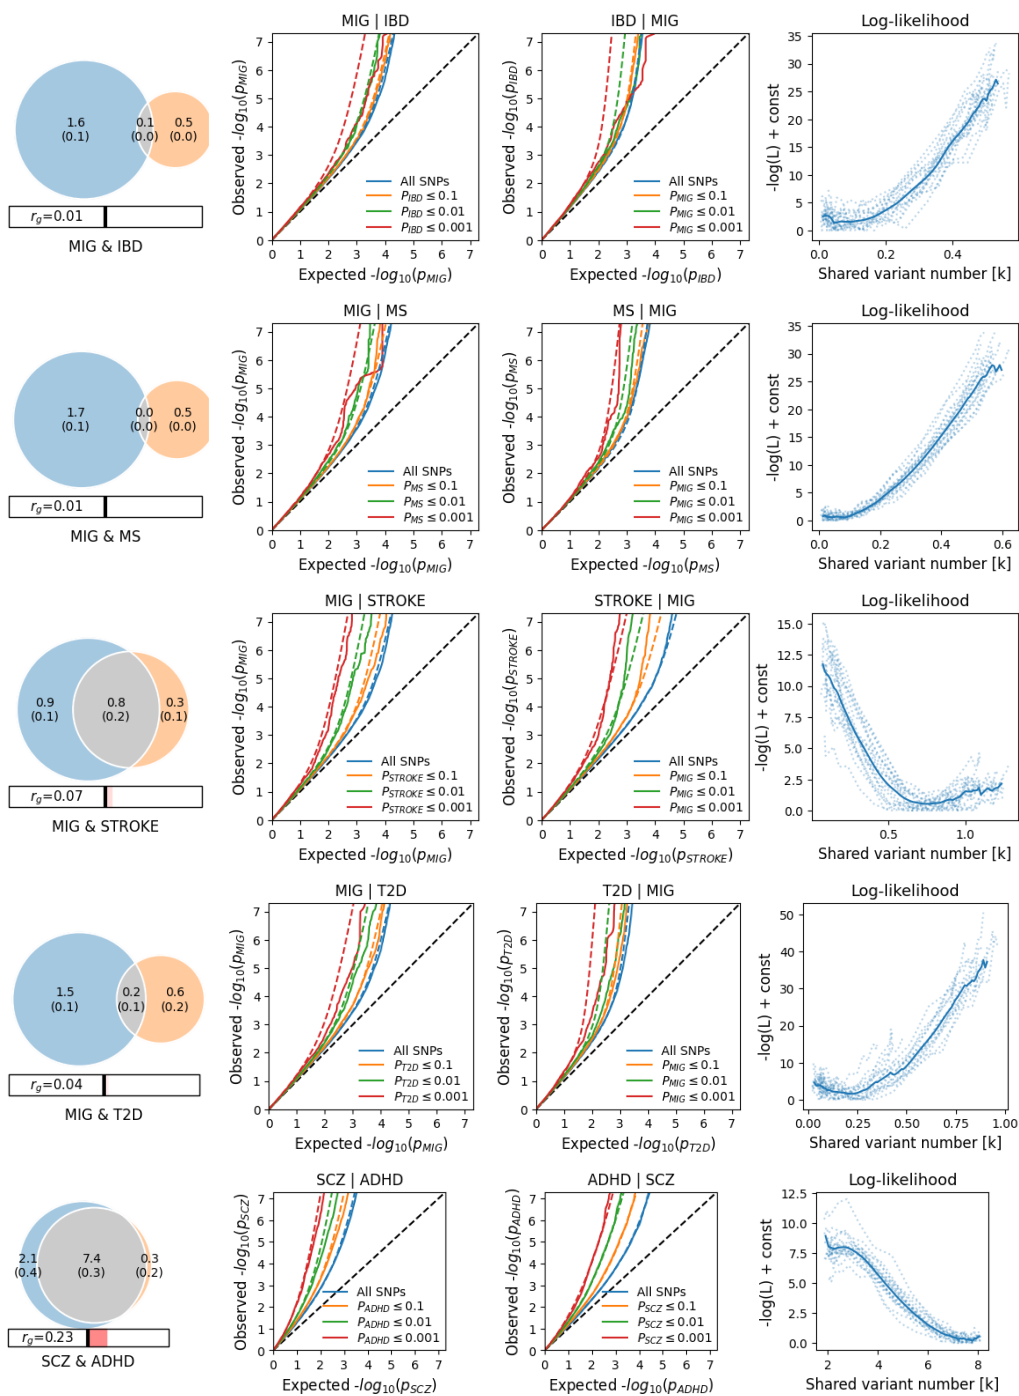

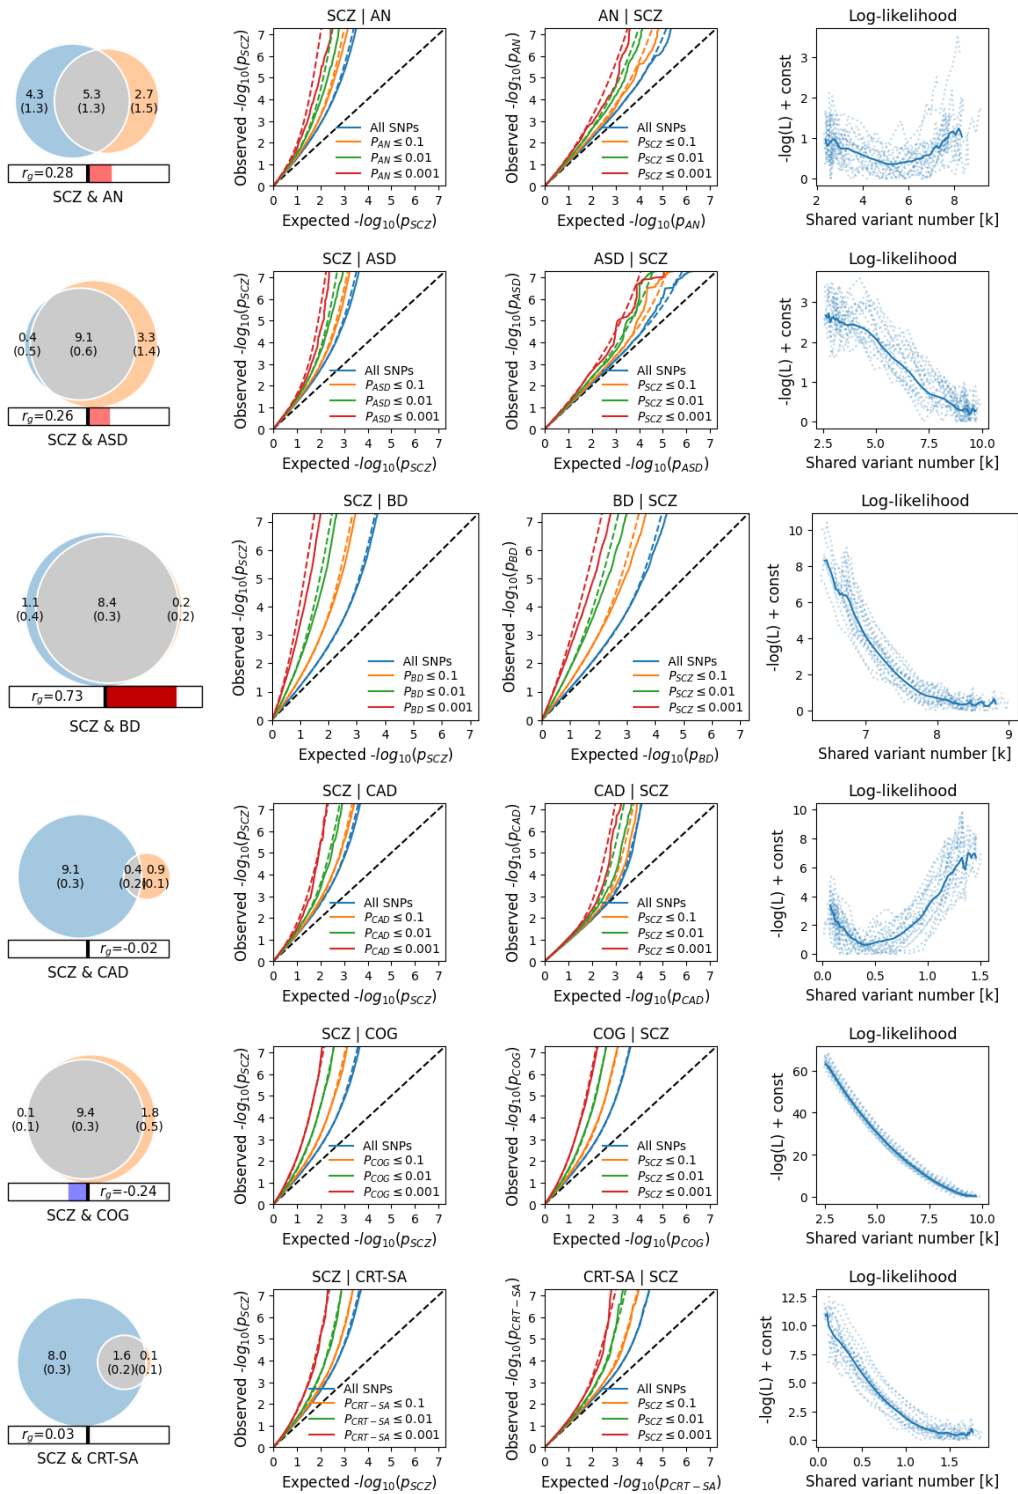



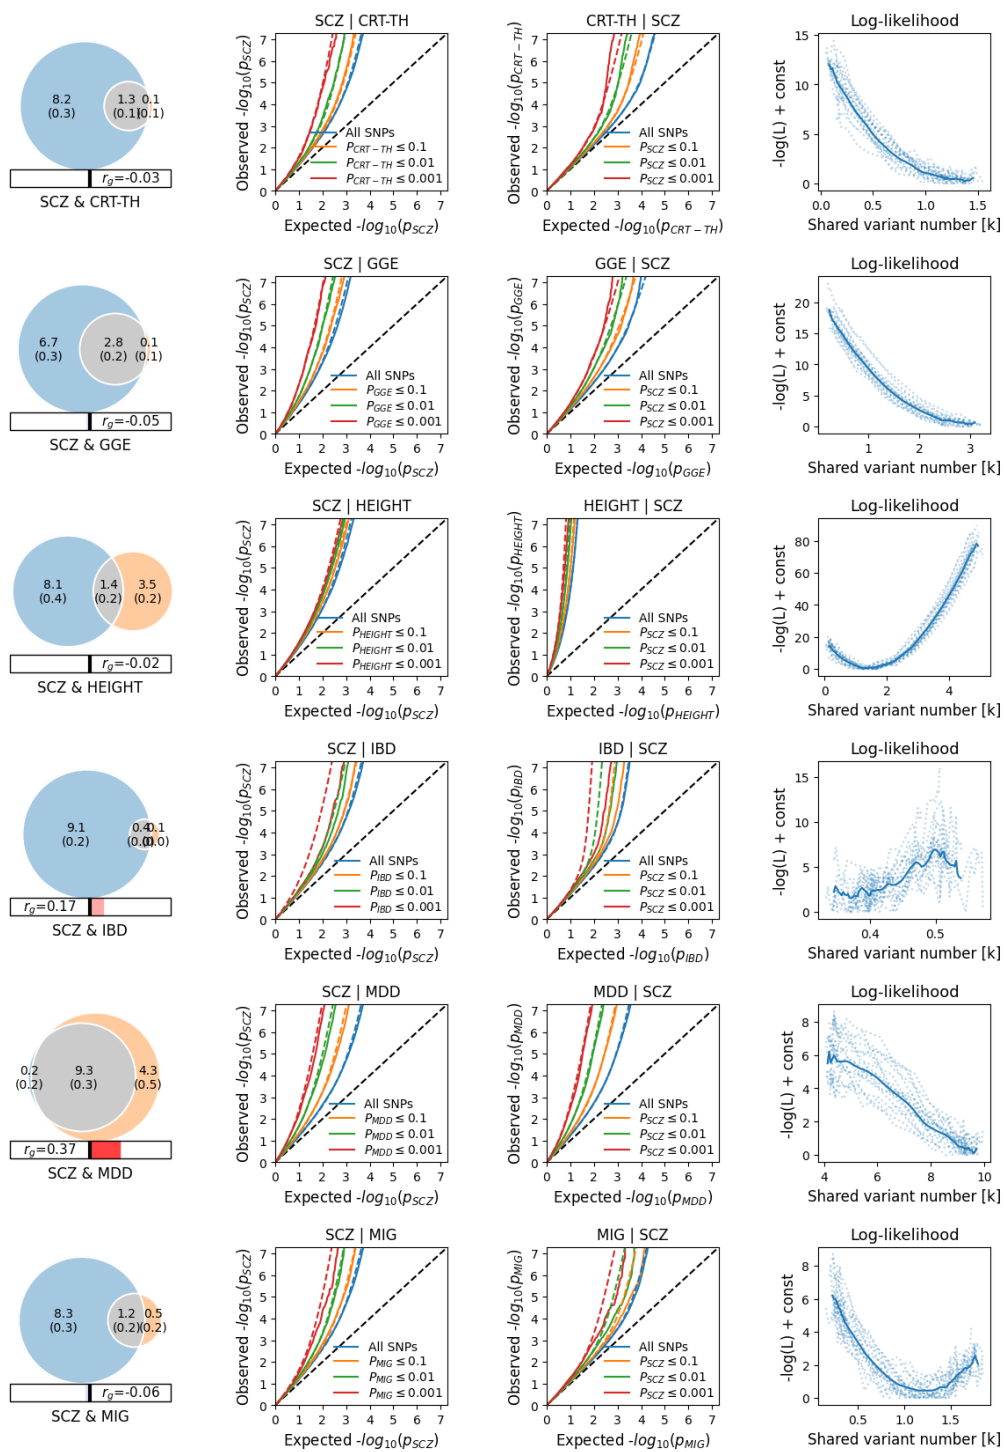

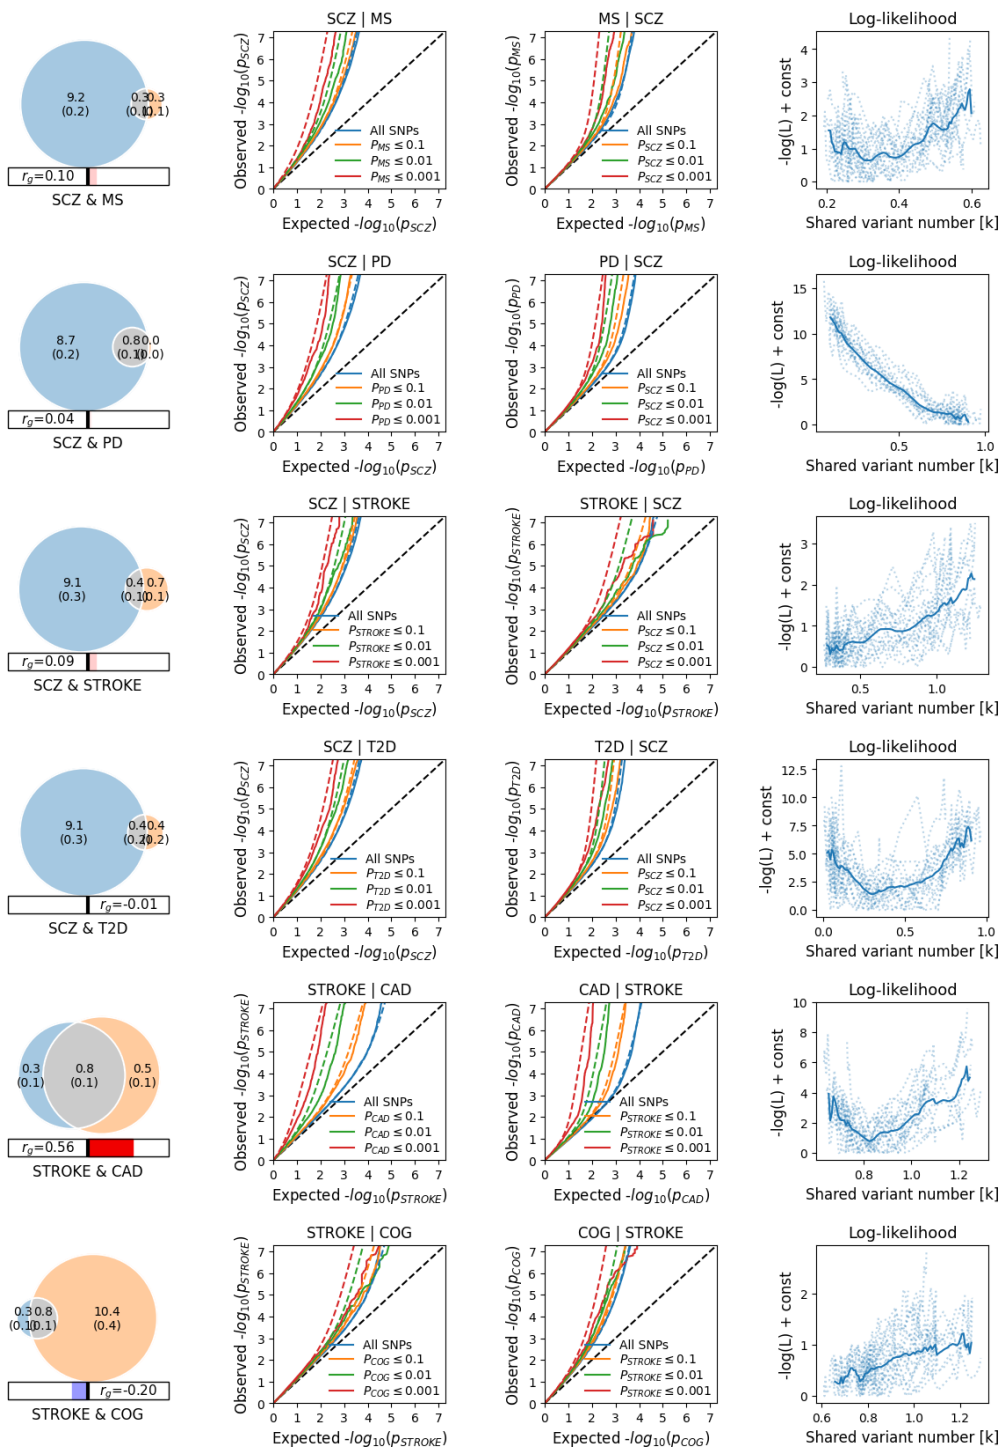

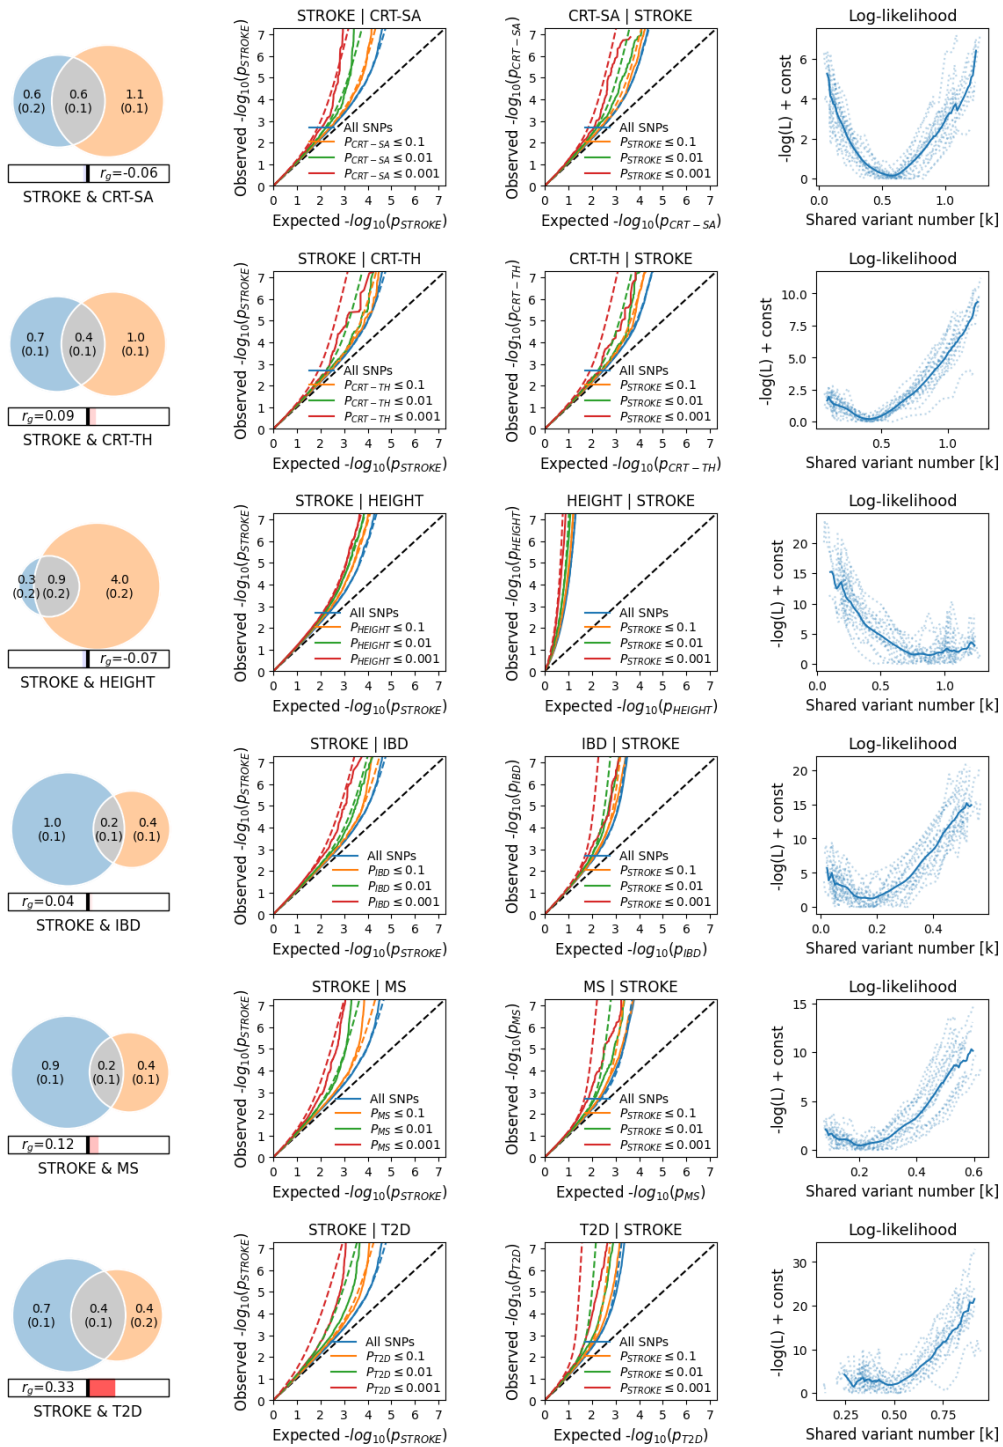

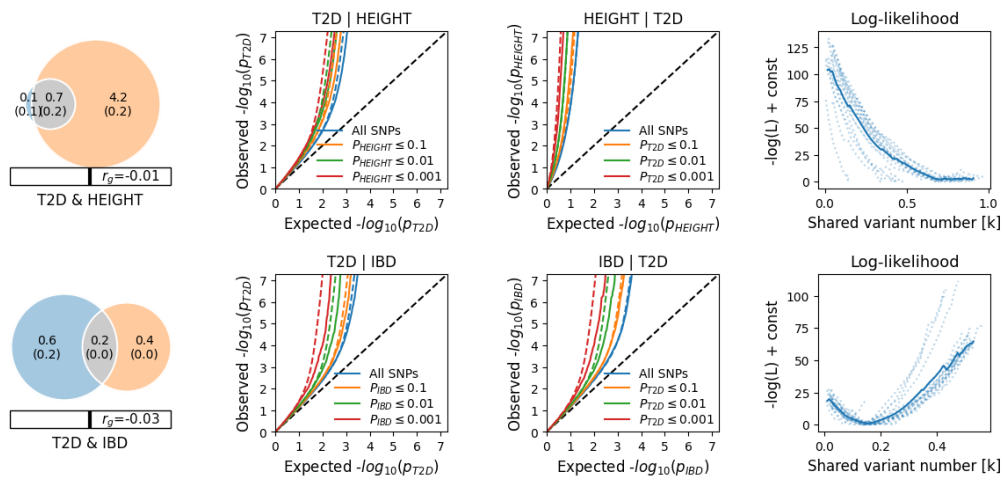

**Supplementary Fig. 3 | Bivariate MiXeR estimates of genetic overlap.** For each pair of phenotypes, the unique and overlapping genetic architectures estimated using MiXeR<sup>47</sup>, excluding phenotypes with poor model fit due to insufficient GWAS power (ANX, PTSD, TS, OCD, FE, ET and LBD). MiXeR-modeled Venn diagrams displaying the number (in thousands) of shared and phenotype-specific “causal” variants for each pair of phenotypes, conditional QQ plots showing real-life vs modelled cross trait enrichment and log-likelihood plots, plotting the adjusted negative log-likelihood function against the number of shared ‘causal’ variants, constrained to minimum and maximum possible overlap.

### 3.4 Supplementary Fig. 4 | Tissue specific expression of mapped genes

#### Alzheimer's disease

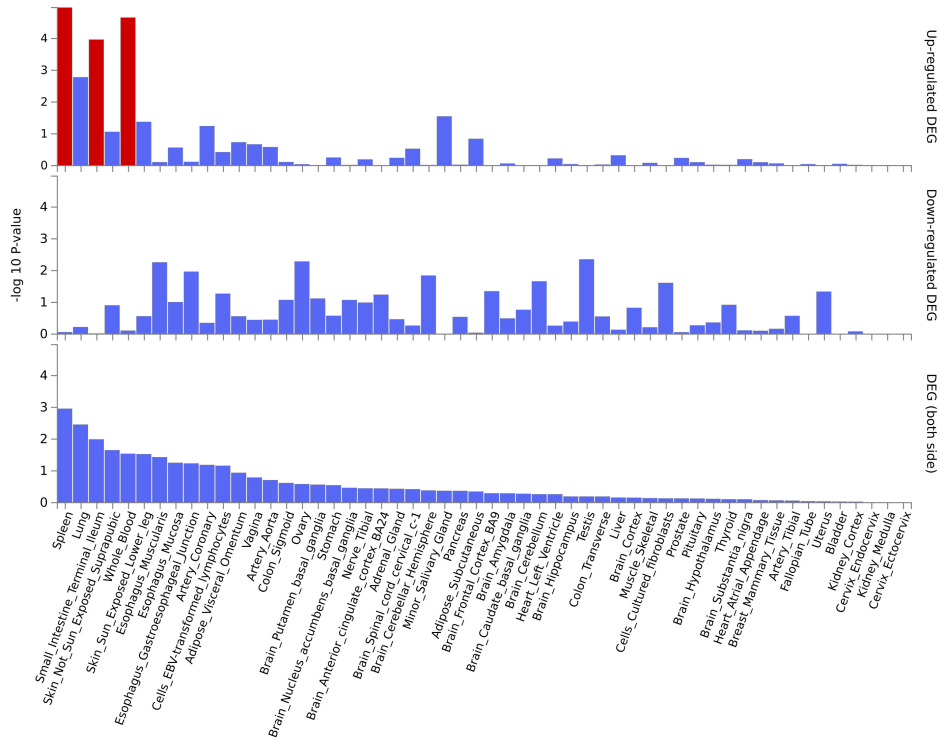

#### Attention-deficit/hyperactivity disorder

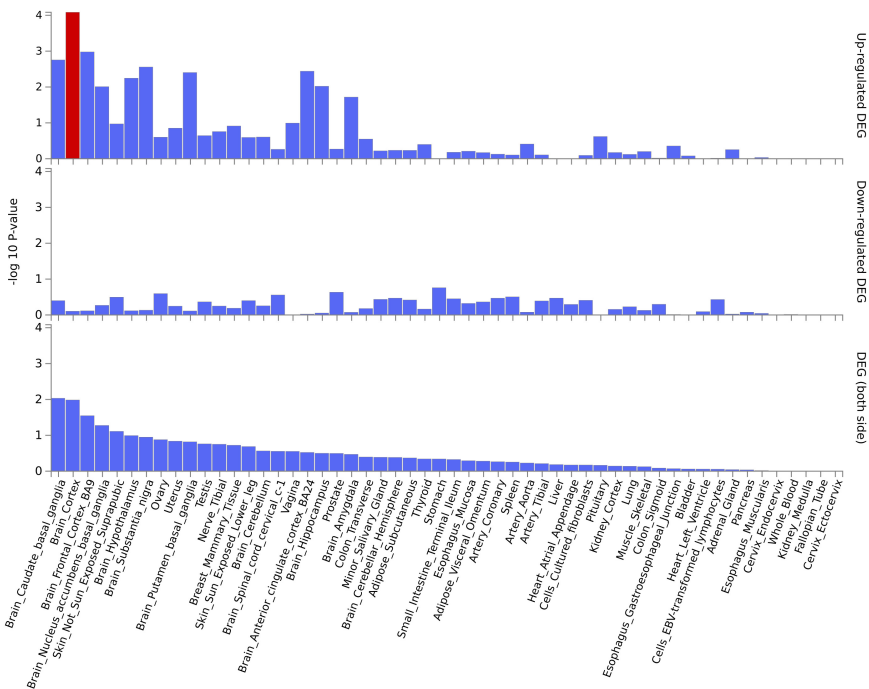

## Anorexia nervosa

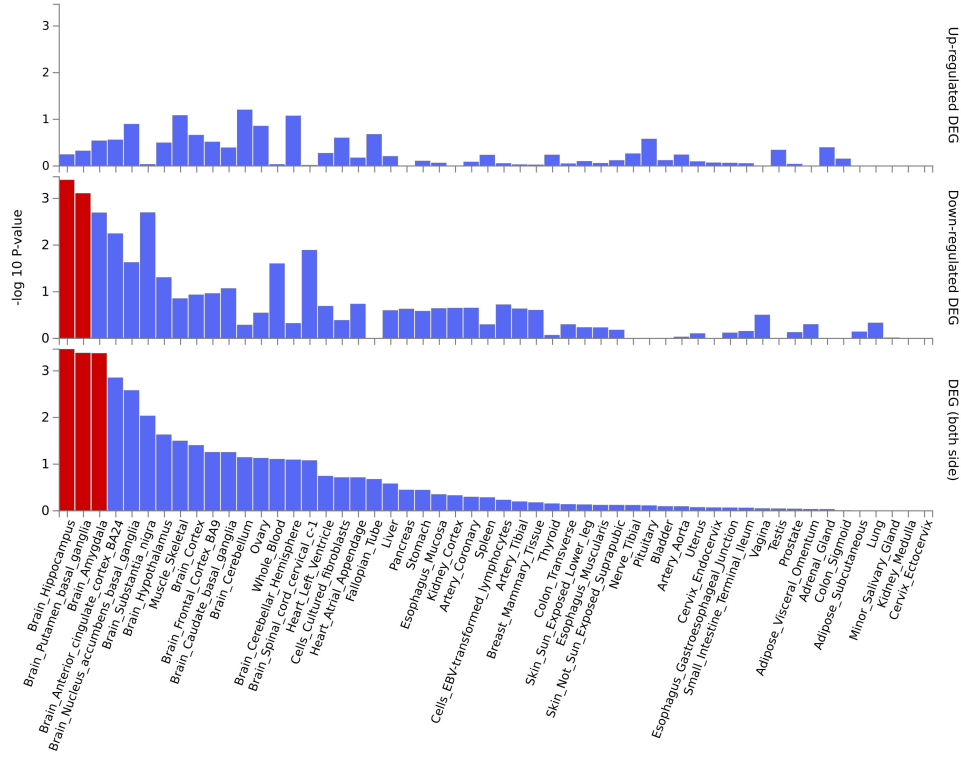

## Cortical thickness

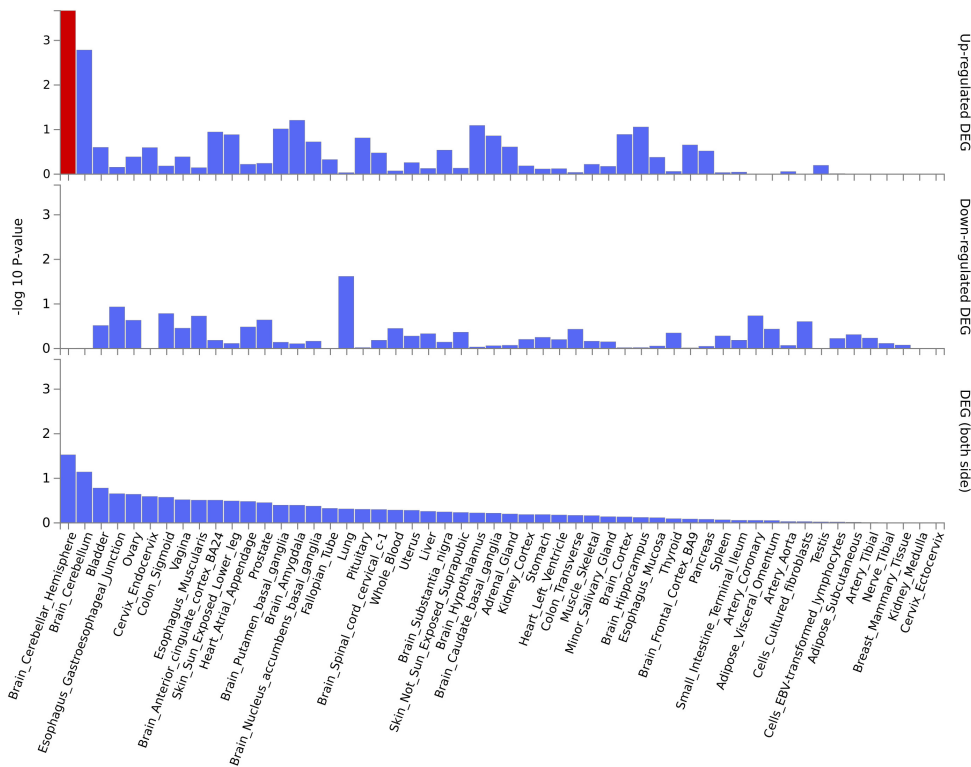

# General cognitive ability

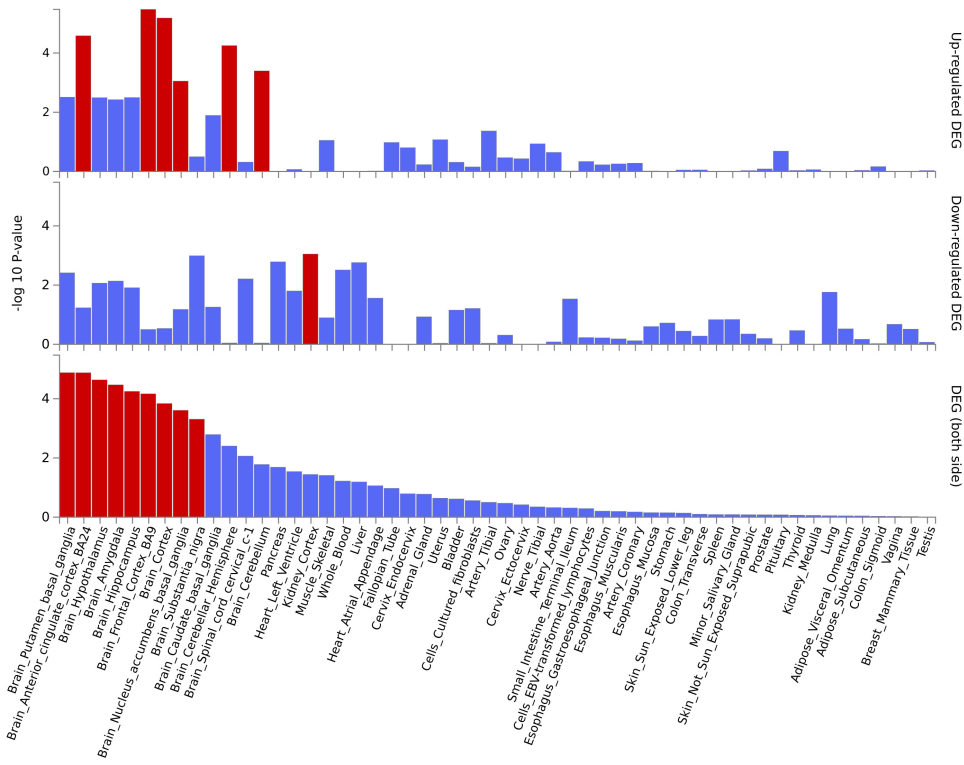

# Height

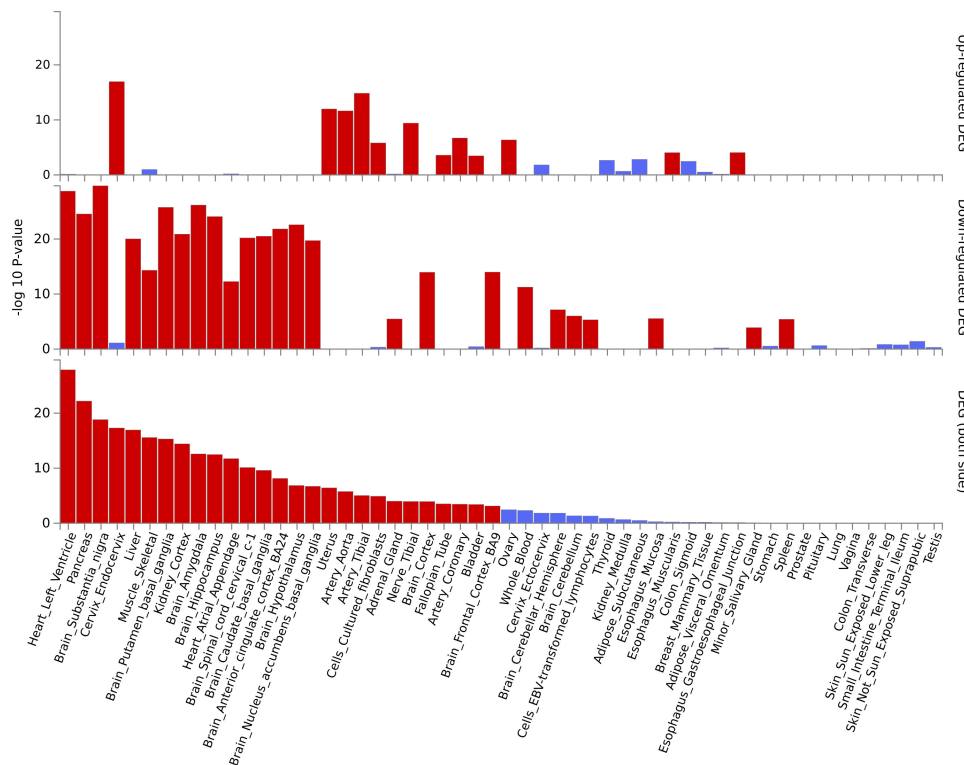

## Inflammatory bowel disease

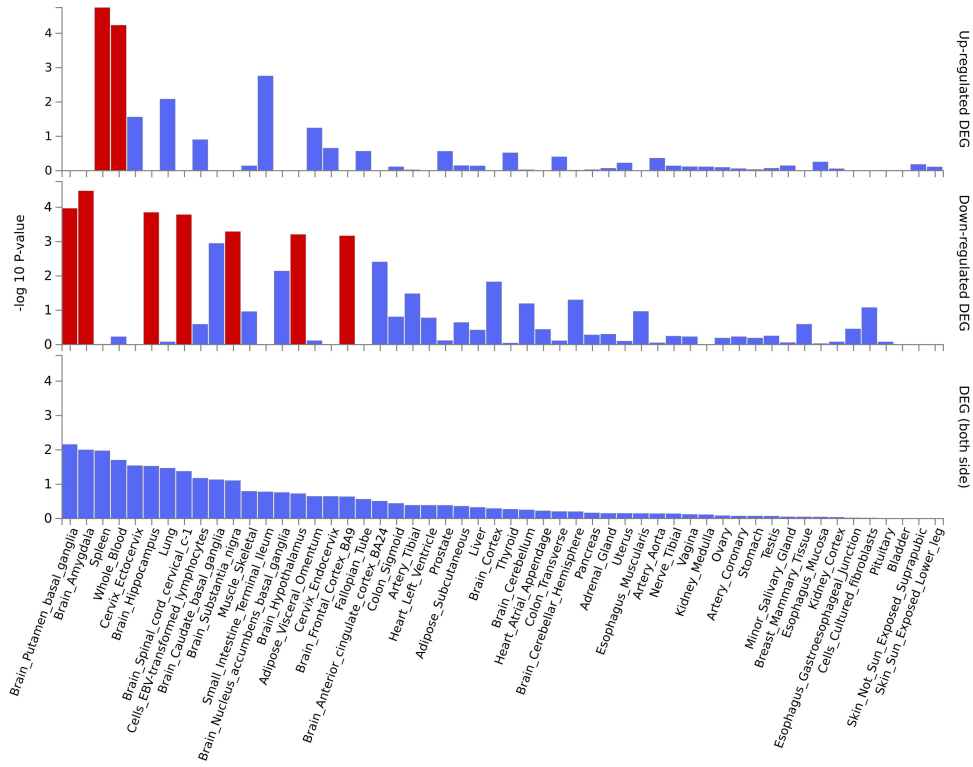

## Major depressive disorder

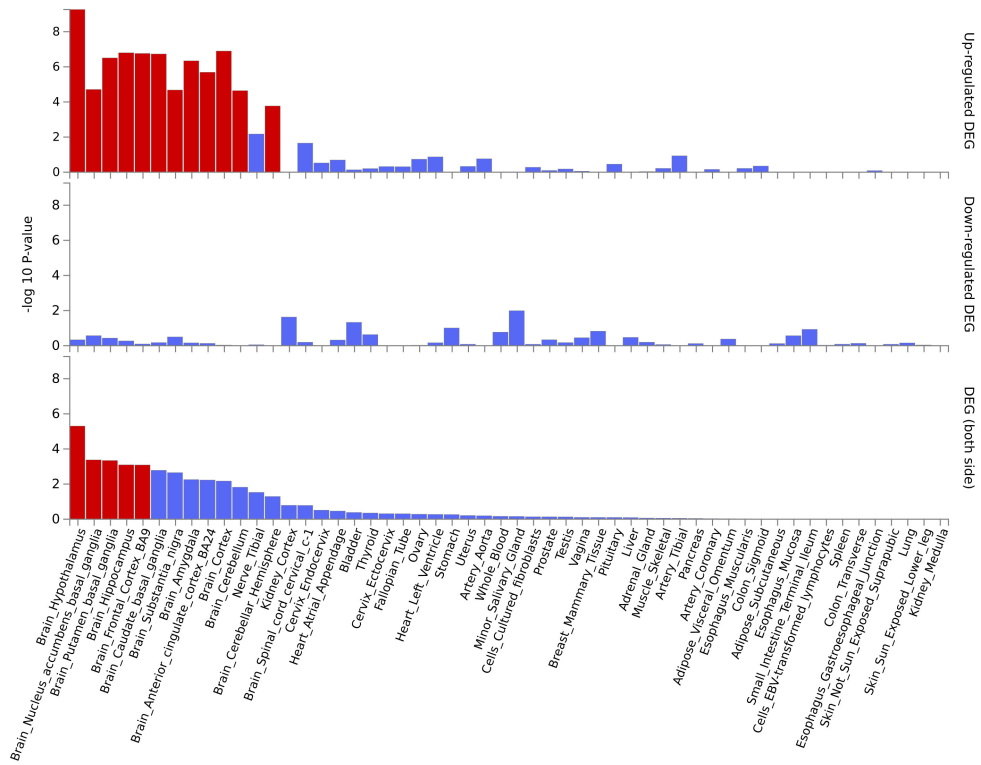



## Multiple sclerosis

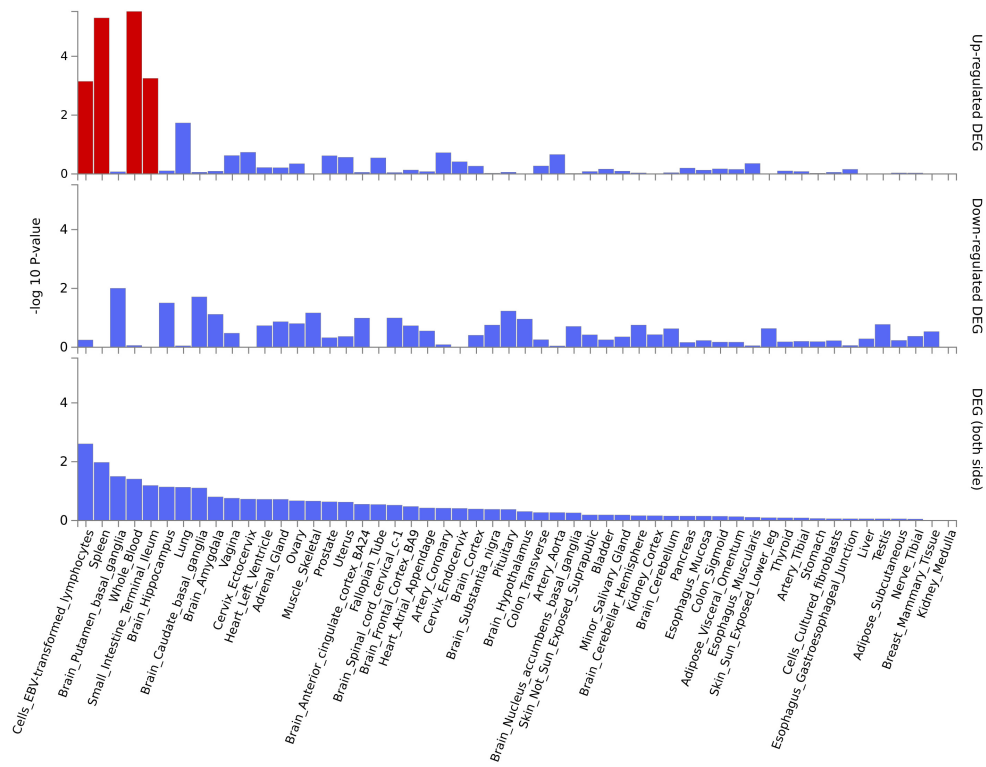

## Parkinson's disease

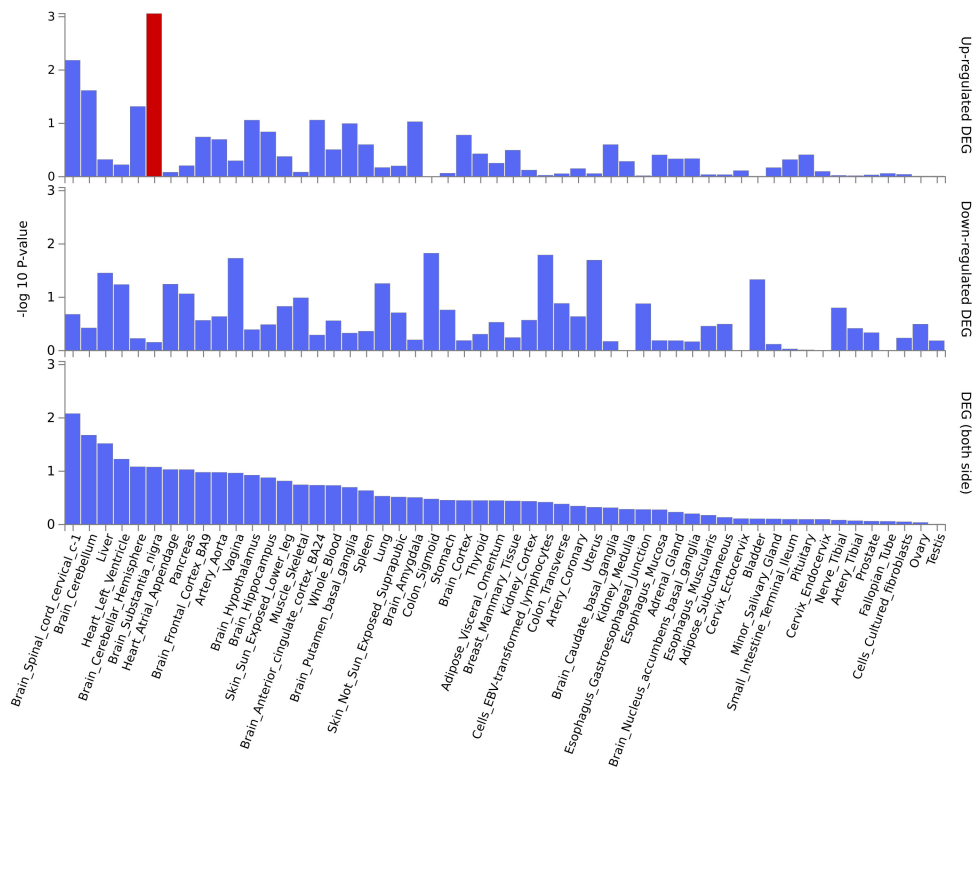

## Schizophrenia

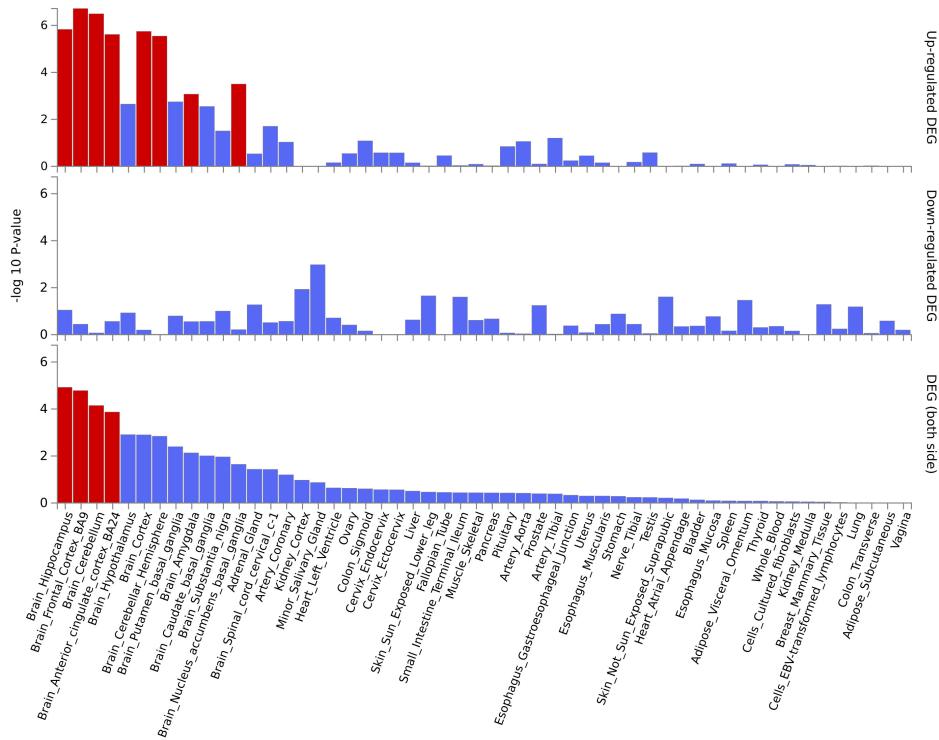

## Type 2 Diabetes

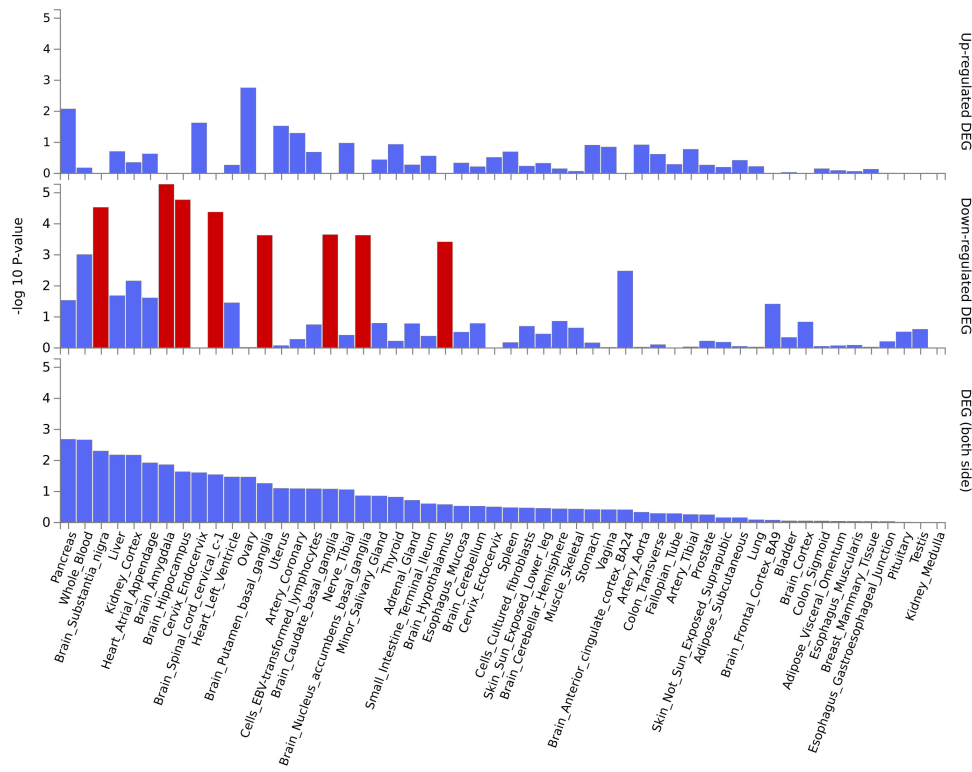

**Supplementary Fig. 4 | Tissue specific enrichment.** Results from MAGMA tissue specificity analysis across 54 different tissue types based on GTEx v.8 data<sup>44</sup>, as implemented in FUMA<sup>45</sup>. Red bars indicate significant results after Bonferroni correction..



## Multiple sclerosis

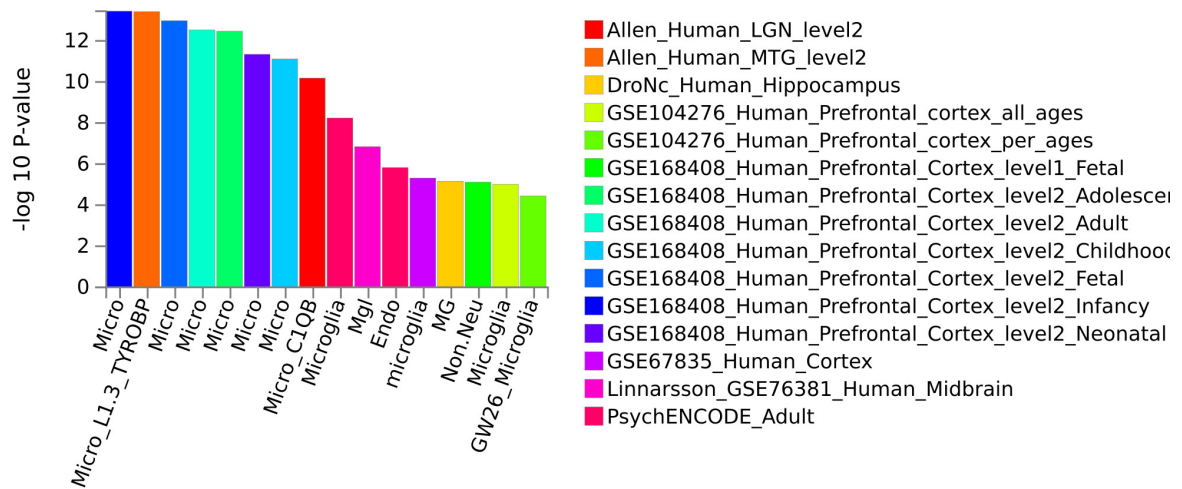

## Attention-deficit/hyperactivity disorder

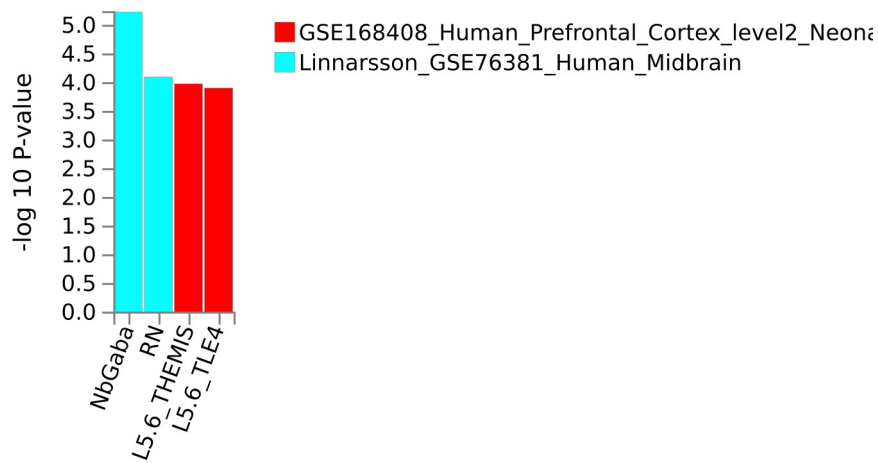

## Bipolar disorder

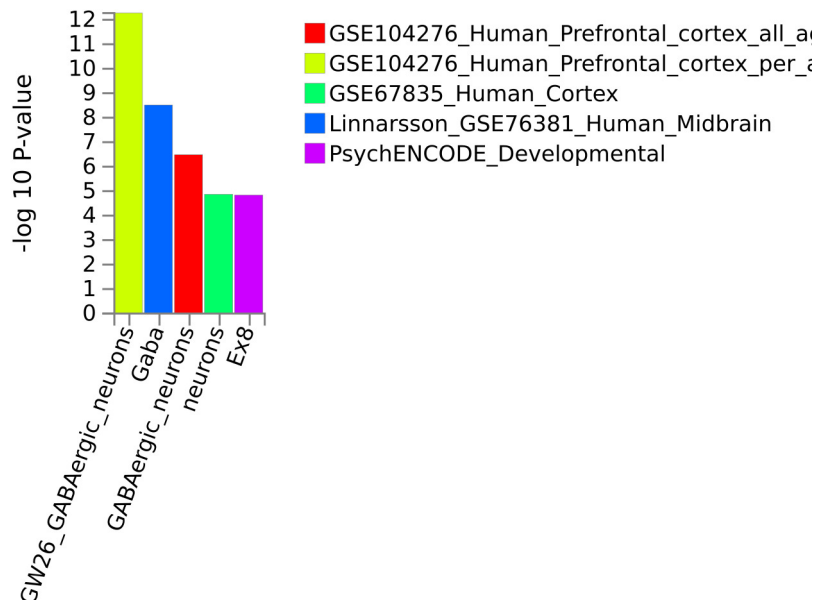

## Major depressive disorder

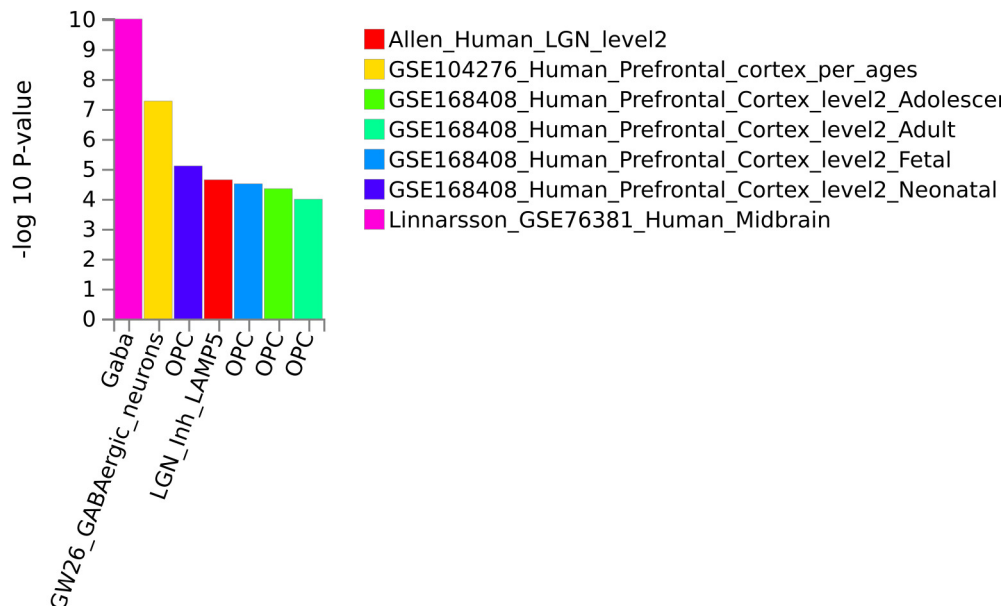

## Schizophrenia

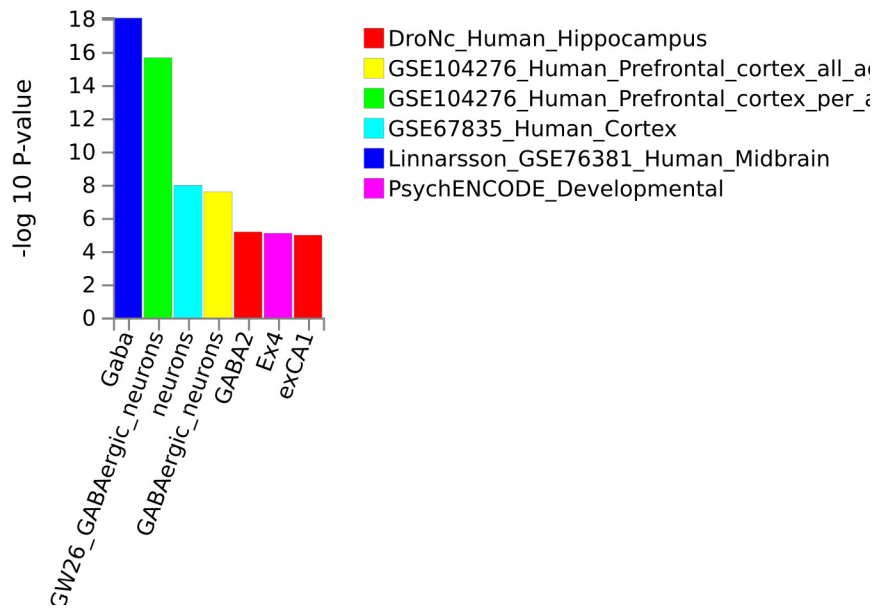

## Coronary artery disease

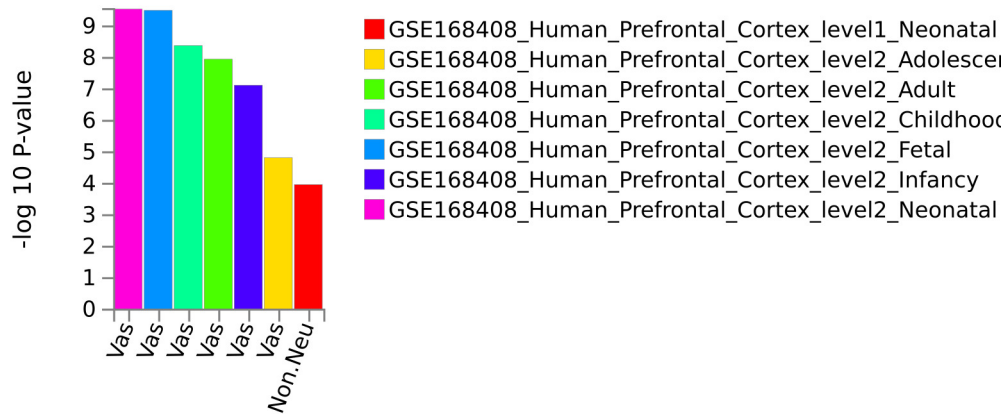

## Cortical surface area

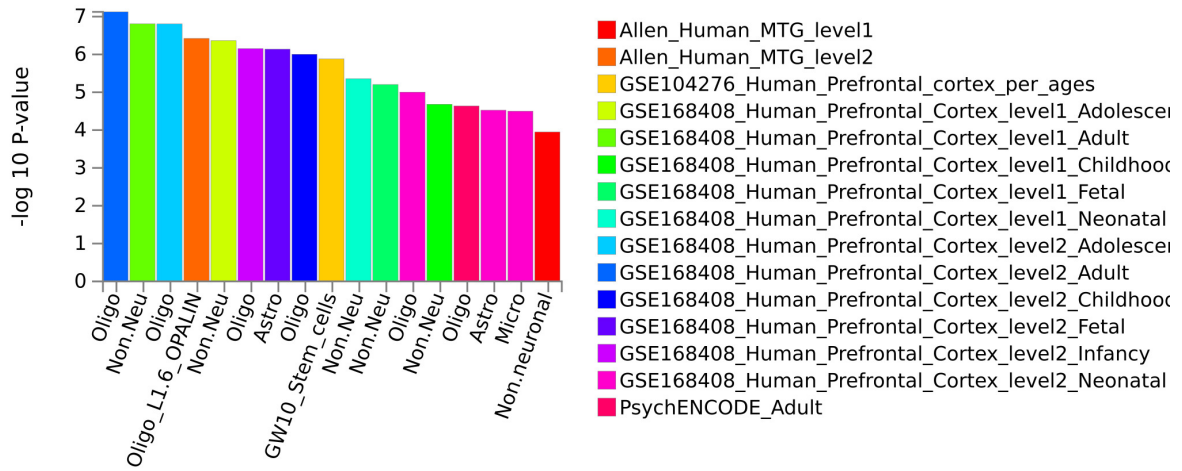

## General cognitive ability

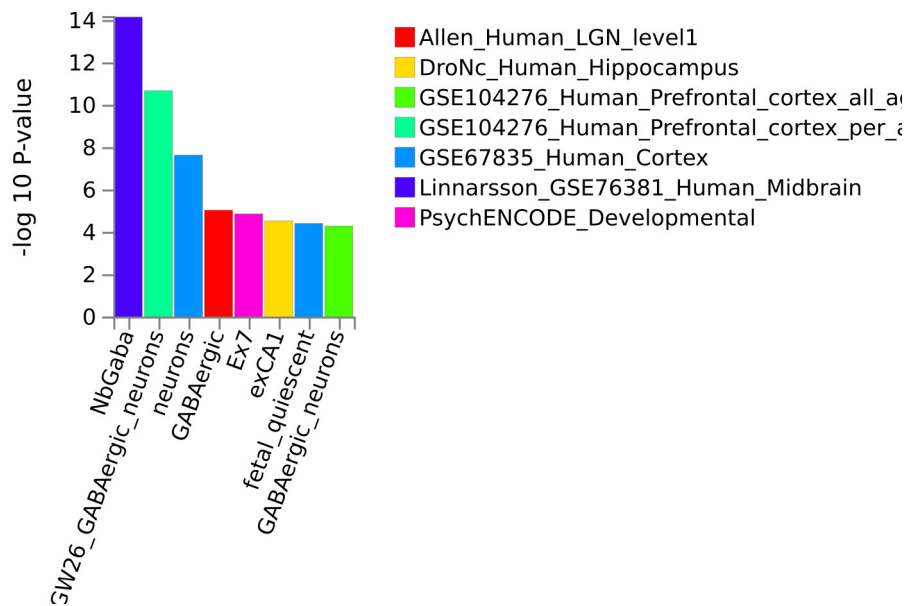



## Inflammatory bowel disease

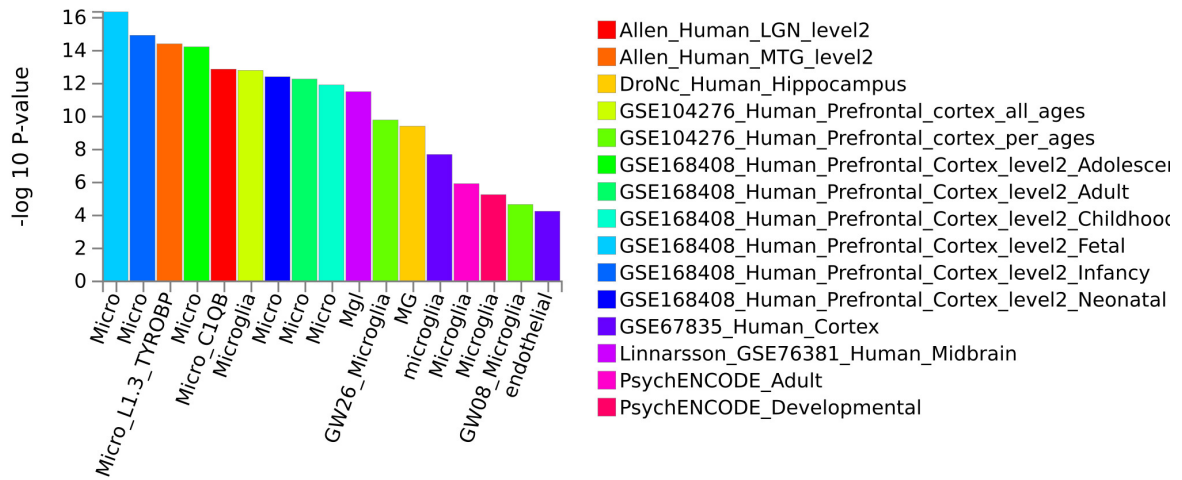

## Type 2 diabetes

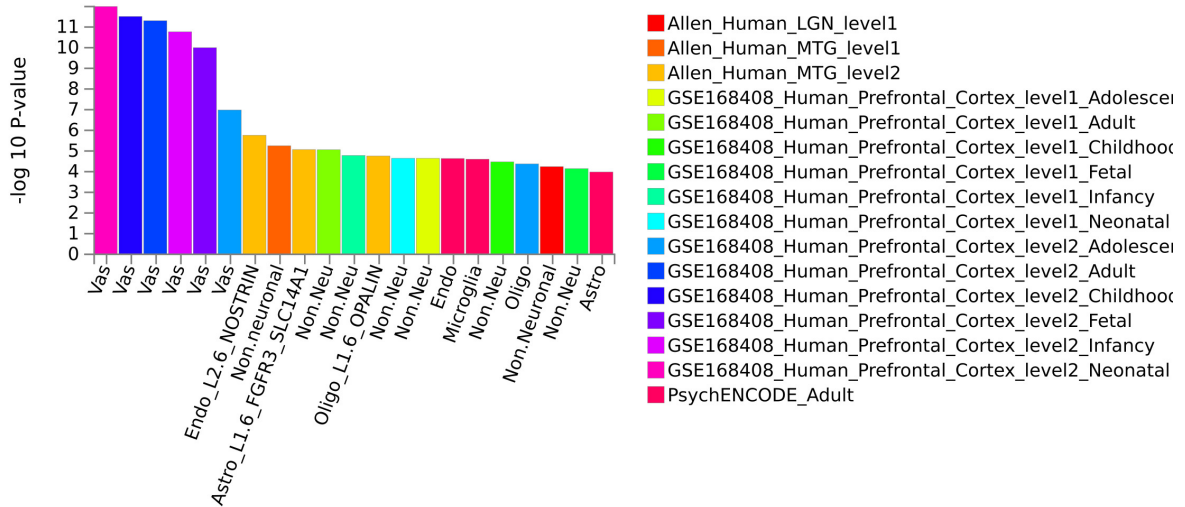



#### 4 Supplementary References

1. Wightman, D.P. *et al.* A genome-wide association study with 1,126,563 individuals identifies new risk loci for Alzheimer's disease. *Nat Genet* **53**, 1276-1282 (2021).
2. Jansen, I.E. *et al.* Genome-wide meta-analysis identifies new loci and functional pathways influencing Alzheimer's disease risk. *Nat Genet* **51**, 404-413 (2019).
3. Brooks, B.R., Miller, R.G., Swash, M., Munsat, T.L. & World Federation of Neurology Research Group on Motor Neuron, D. El Escorial revisited: revised criteria for the diagnosis of amyotrophic lateral sclerosis. *Amyotroph Lateral Scler Other Motor Neuron Disord* **1**, 293-9 (2000).
4. Liao, C. *et al.* Association of Essential Tremor With Novel Risk Loci: A Genome-Wide Association Study and Meta-analysis. *JAMA Neurol* **79**, 185-193 (2022).
5. Berkovic, S.F., Cavalleri, G.L. & Koeleman, B.P.C. Genome-wide meta-analysis of over 29,000 people with epilepsy reveals 26 loci and subtype-specific genetic architecture. *medRxiv*, 2022.06.08.22276120 (2022).
6. Chia, R. *et al.* Genome sequencing analysis identifies new loci associated with Lewy body dementia and provides insights into its genetic architecture. *Nat Genet* **53**, 294-303 (2021).
7. Hautakangas, H. *et al.* Genome-wide analysis of 102,084 migraine cases identifies 123 risk loci and subtype-specific risk alleles. *Nat Genet* **54**, 152-160 (2022).
8. International Multiple Sclerosis Genetics, C. Multiple sclerosis genomic map implicates peripheral immune cells and microglia in susceptibility. *Science* **365**(2019).
9. Nalls, M.A. *et al.* Identification of novel risk loci, causal insights, and heritable risk for Parkinson's disease: a meta-analysis of genome-wide association studies. *Lancet Neurol* **18**, 1091-1102 (2019).
10. Nalls, M.A. *et al.* Large-scale meta-analysis of genome-wide association data identifies six new risk loci for Parkinson's disease. *Nat Genet* **46**, 989-93 (2014).
11. Chang, D. *et al.* A meta-analysis of genome-wide association studies identifies 17 new Parkinson's disease risk loci. *Nat Genet* **49**, 1511-1516 (2017).
12. Mishra, A. *et al.* Stroke genetics informs drug discovery and risk prediction across ancestries. *Nature* **611**, 115-123 (2022).
13. Watson, H.J. *et al.* Genome-wide association study identifies eight risk loci and implicates metabo-psychiatric origins for anorexia nervosa. *Nat Genet* **51**, 1207-1214 (2019).
14. Purves, K.L. *et al.* A major role for common genetic variation in anxiety disorders. *Mol Psychiatry* **25**, 3292-3303 (2020).
15. Otowa, T. *et al.* Meta-analysis of genome-wide association studies of anxiety disorders. *Mol Psychiatry* **21**, 1485 (2016).
16. Meier, S.M. *et al.* Genetic Variants Associated With Anxiety and Stress-Related Disorders: A Genome-Wide Association Study and Mouse-Model Study. *JAMA Psychiatry* **76**, 924-932 (2019).
17. Demontis, D. *et al.* Genome-wide analyses of ADHD identify 27 risk loci, refine the genetic architecture and implicate several cognitive domains. *Nat Genet* (2023).
18. Grove, J. *et al.* Identification of common genetic risk variants for autism spectrum disorder. *Nat Genet* **51**, 431-444 (2019).
19. Mullins, N. *et al.* Genome-wide association study of more than 40,000 bipolar disorder cases provides new insights into the underlying biology. *Nat Genet* **53**, 817-829 (2021).
20. Wray, N.R. *et al.* Genome-wide association analyses identify 44 risk variants and refine the genetic architecture of major depression. *Nat Genet* **50**, 668-681 (2018).

21. Hyde, C.L. *et al.* Identification of 15 genetic loci associated with risk of major depression in individuals of European descent. *Nat Genet* **48**, 1031-6 (2016).
22. Howard, D.M. *et al.* Genome-wide meta-analysis of depression identifies 102 independent variants and highlights the importance of the prefrontal brain regions. *Nat Neurosci* **22**, 343-352 (2019).
23. Levey, D.F. *et al.* Bi-ancestral depression GWAS in the Million Veteran Program and meta-analysis in >1.2 million individuals highlight new therapeutic directions. *Nat Neurosci* **24**, 954-963 (2021).
24. Kurki, M.I. *et al.* FinnGen: Unique genetic insights from combining isolated population and national health register data. *medRxiv*, 2022.03.03.22271360 (2022).
25. International Obsessive Compulsive Disorder Foundation Genetics, C. & Studies, O.C.D.C.G.A. Revealing the complex genetic architecture of obsessive-compulsive disorder using meta-analysis. *Mol Psychiatry* **23**, 1181-1188 (2018).
26. Nievergelt, C.M. *et al.* International meta-analysis of PTSD genome-wide association studies identifies sex- and ancestry-specific genetic risk loci. *Nat Commun* **10**, 4558 (2019).
27. Trubetskoy, V. *et al.* Mapping genomic loci implicates genes and synaptic biology in schizophrenia. *Nature* **604**, 502-508 (2022).
28. Yu, D. *et al.* Interrogating the Genetic Determinants of Tourette's Syndrome and Other Tic Disorders Through Genome-Wide Association Studies. *Am J Psychiatry* **176**, 217-227 (2019).
29. Fischl, B. *et al.* Whole brain segmentation: automated labeling of neuroanatomical structures in the human brain. *Neuron* **33**, 341-55 (2002).
30. Mbatchou, J. *et al.* Computationally efficient whole-genome regression for quantitative and binary traits. *Nat Genet* **53**, 1097-1103 (2021).
31. Savage, J.E. *et al.* Genome-wide association meta-analysis in 269,867 individuals identifies new genetic and functional links to intelligence. *Nat Genet* **50**, 912-919 (2018).
32. Wuttke, M. *et al.* A catalog of genetic loci associated with kidney function from analyses of a million individuals. *Nat Genet* **51**, 957-972 (2019).
33. Nelson, C.P. *et al.* Association analyses based on false discovery rate implicate new loci for coronary artery disease. *Nat Genet* **49**, 1385-1391 (2017).
34. Nikpay, M. *et al.* A comprehensive 1,000 Genomes-based genome-wide association meta-analysis of coronary artery disease. *Nat Genet* **47**, 1121-1130 (2015).
35. Myocardial Infarction Genetics and CARDIoGRAM Exome Consortia Investigators. Coding Variation in ANGPTL4, LPL, and SVEP1 and the Risk of Coronary Disease. *N Engl J Med* **374**, 1898 (2016).
36. de Lange, K.M. *et al.* Genome-wide association study implicates immune activation of multiple integrin genes in inflammatory bowel disease. *Nat Genet* **49**, 256-261 (2017).
37. Mahajan, A. *et al.* Fine-mapping type 2 diabetes loci to single-variant resolution using high-density imputation and islet-specific epigenome maps. *Nat Genet* **50**, 1505-1513 (2018).
38. Yengo, L. *et al.* A saturated map of common genetic variants associated with human height. *Nature* **610**, 704-712 (2022).
39. Bulik-Sullivan, B. *et al.* An atlas of genetic correlations across human diseases and traits. *Nat Genet* **47**, 1236-41 (2015).
40. Millan, M.J. *et al.* Cognitive dysfunction in psychiatric disorders: characteristics, causes and the quest for improved therapy. *Nat Rev Drug Discov* **11**, 141-68 (2012).
41. Aarsland, D. *et al.* Parkinson disease-associated cognitive impairment. *Nat Rev Dis Primers* **7**, 47 (2021).

42. Bell, B., Lin, J.J., Seidenberg, M. & Hermann, B. The neurobiology of cognitive disorders in temporal lobe epilepsy. *Nat Rev Neurol* **7**, 154-64 (2011).
43. World Health Organization. International Classification of Diseases for Mortality and Morbidity Statistics (Eleventh Revision). (2018).
44. The GTEx Consortium. The Genotype-Tissue Expression (GTEx) project. *Nat Genet* **45**, 580-5 (2013).
45. Watanabe, K., Taskesen, E., van Bochoven, A. & Posthuma, D. Functional mapping and annotation of genetic associations with FUMA. *Nat Commun* **8**, 1826 (2017).
46. Holland, D. *et al.* Beyond SNP heritability: Polygenicity and discoverability of phenotypes estimated with a univariate Gaussian mixture model. *PLoS Genet* **16**, e1008612 (2020).
47. Frei, O. *et al.* Bivariate causal mixture model quantifies polygenic overlap between complex traits beyond genetic correlation. *Nat Commun* **10**, 2417 (2019).
48. Watanabe, K., Umicevic Mirkov, M., de Leeuw, C.A., van den Heuvel, M.P. & Posthuma, D. Genetic mapping of cell type specificity for complex traits. *Nat Commun* **10**, 3222 (2019).
